# Supplementary material for: GPCR Genes Are Preferentially Retained after Whole Genome Duplication
Source: PubMed Central journal article supplement (PMC2270905; doi:10.1371/journal.pone.0001903), 2008-04-02

**Fig. S1. Localization of WGD-derived adrenomedullin (ADM) and calcitonin/CGRP (CALCA) gene duplicates on syntenic regions of chromosomes 5 and 13 of *T. nigroviridis*.**

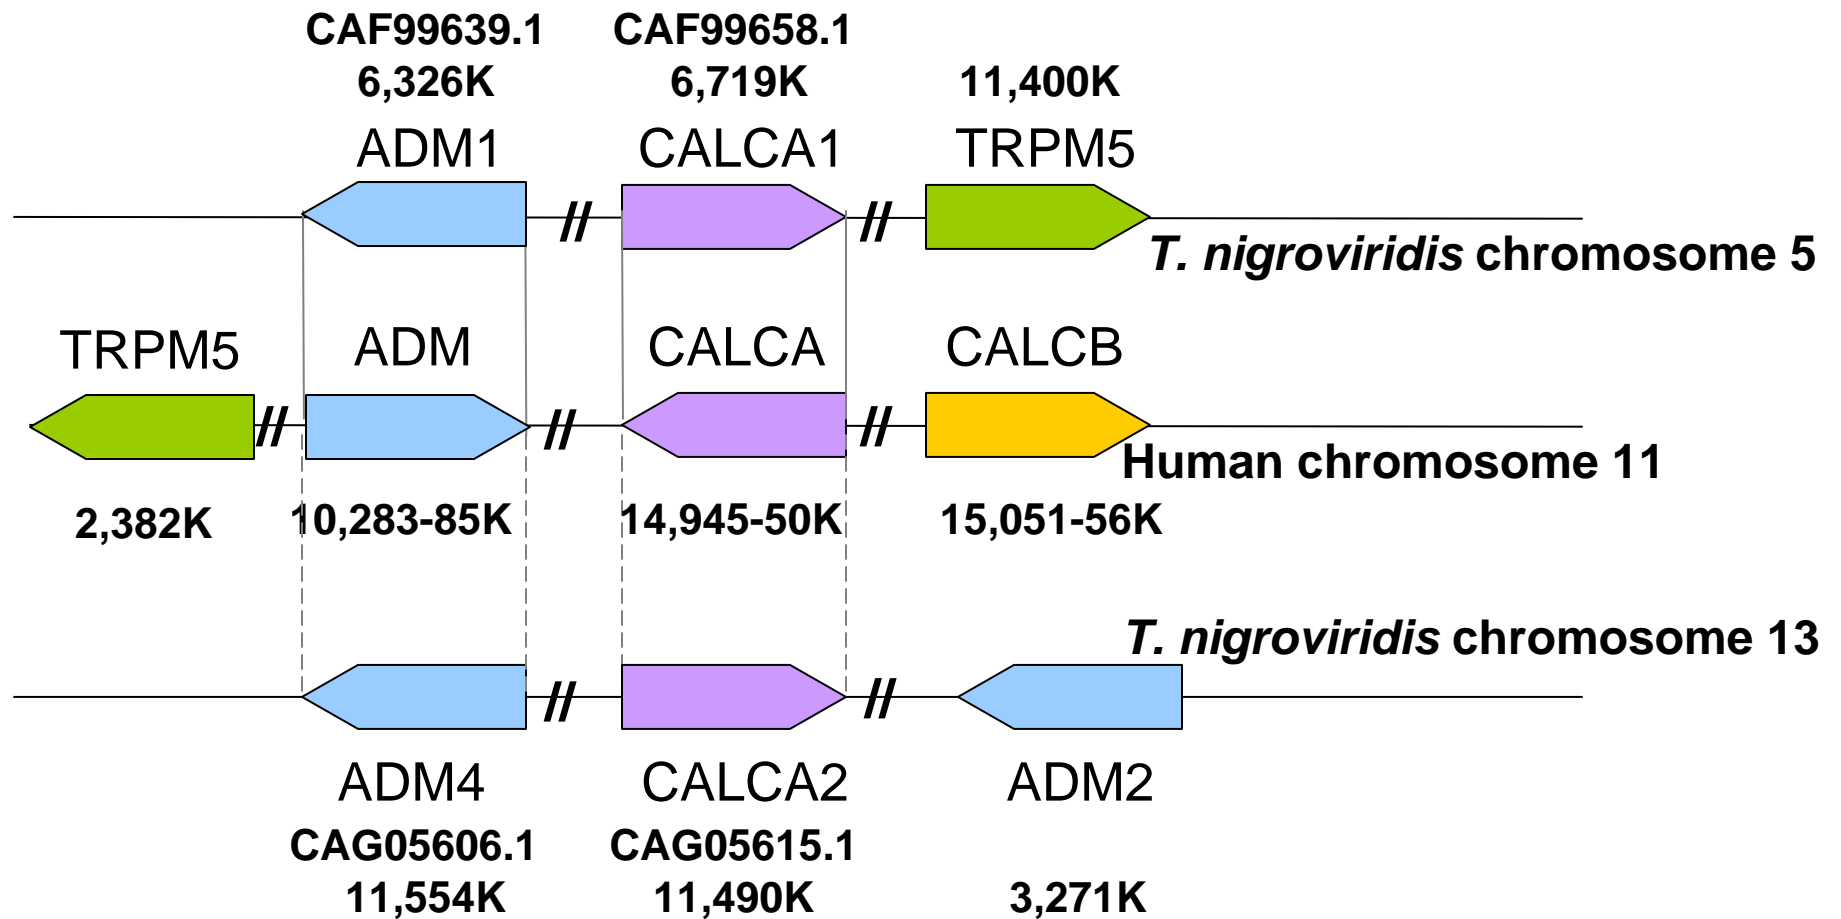

Supplement: pone.0001903.s001.pdf [file pone.0001903.s001.pdf]
