# Supplementary material for: GPCR Genes Are Preferentially Retained after Whole Genome Duplication
Source: PubMed Central journal article supplement (PMC2270905; doi:10.1371/journal.pone.0001903), 2008-04-02
Supplement: pone.0001903.s002.pdf [file pone.0001903.s002.pdf]

**Fig. S2. Comparison of sequence similarity between human nGPCRs and orthologs or co-orthologs from rat, mouse, chicken, *T. nigroviridis*, and *T. rubripes*.**

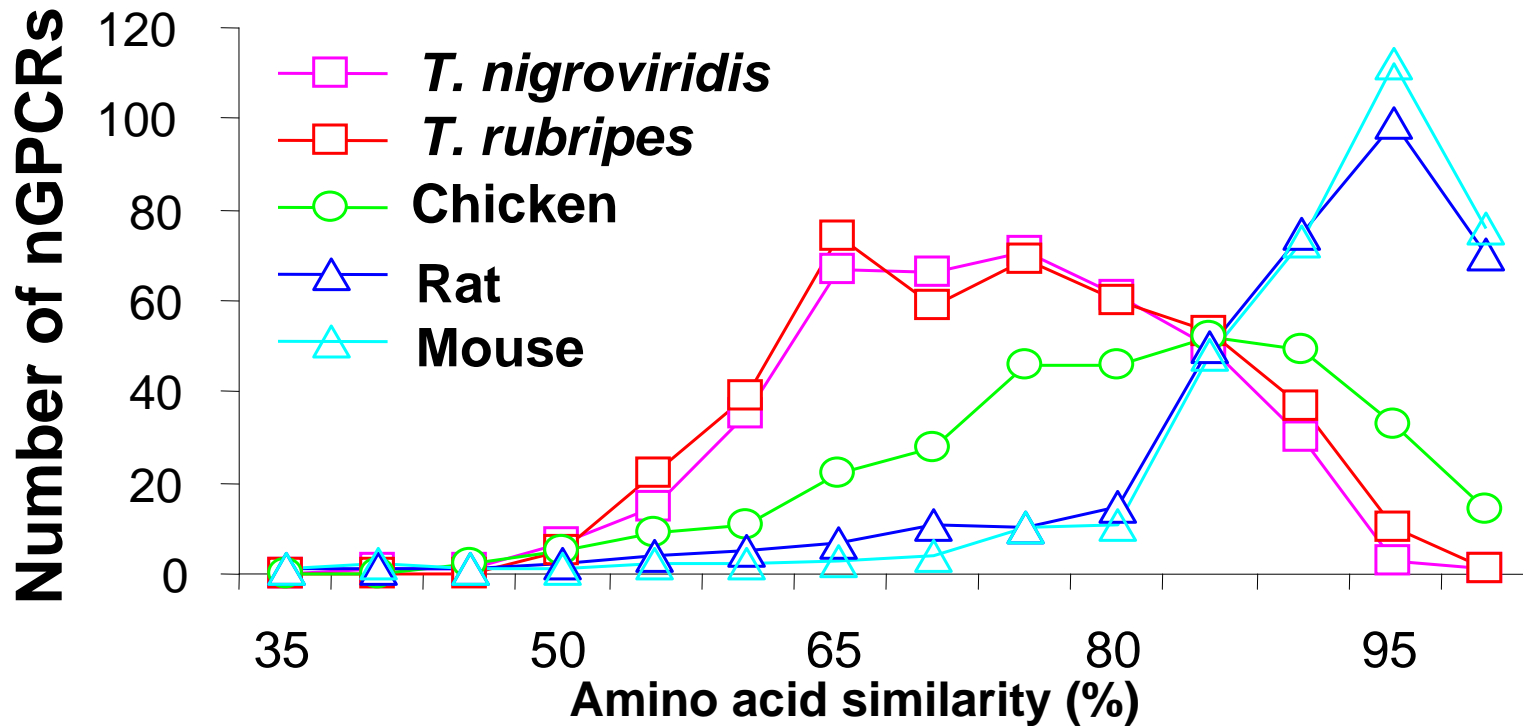

|                                  | Similarity, mean±SEM | Identity, mean±SEM |
|----------------------------------|----------------------|--------------------|
| Human vs. rat                    | 87.30±0.59           | 80.76±0.80         |
| Human vs. mouse                  | 88.77±0.55           | 82.99±0.70         |
| Human vs. chicken                | 78.06±0.66           | 66.55±0.87         |
| Human vs. <i>T. nigroviridis</i> | 71.13±0.50           | 56.73±0.66         |
| Human vs. <i>T. rubripes</i>     | 71.84±0.52           | 57.21±0.66         |
