# Supplementary material for: GPCR Genes Are Preferentially Retained after Whole Genome Duplication
Source: PubMed Central journal article supplement (PMC2270905; doi:10.1371/journal.pone.0001903), 2008-04-02
Supplement: pone.0001903.s003.pdf [file pone.0001903.s003.pdf]

**Table S1 A. Inventory of nGPCR genes in human, rat, mouse, chicken, *T. nigroviridis*, and *T. rubripes*.**

| <b>Class</b>    | <b>Human</b> | <b>Rat</b> | <b>Mouse</b> | <b>Chicken</b> | <b><i>T. nigroviridis</i></b> | <b><i>T. rubripes</i></b> |
|-----------------|--------------|------------|--------------|----------------|-------------------------------|---------------------------|
| <b>A1</b>       | 20           | 17         | 19           | 21             | 43                            | 44                        |
| <b>A2</b>       | 53           | 63         | 62           | 52             | 84                            | 81                        |
| <b>A3</b>       | 26           | 26         | 26           | 19             | 30                            | 30                        |
| <b>A4</b>       | 49           | 40         | 44           | 40             | 46                            | 46                        |
| <b>A5</b>       | 49           | 47         | 48           | 48             | 63                            | 72                        |
| <b>A6</b>       | 8            | 8          | 8            | 8              | 10                            | 10                        |
| <b>A7</b>       | 69           | 67         | 71           | 51             | 70                            | 68                        |
| <b>A8</b>       | 10           | 20         | 31           | 4              | 0                             | 0                         |
| <b>Subtotal</b> | <b>284</b>   | <b>288</b> | <b>309</b>   | <b>243</b>     | <b>346</b>                    | <b>351</b>                |
| <b>B</b>        | 48           | 44         | 46           | 42             | 53                            | 50                        |
| <b>C</b>        | 16           | 16         | 16           | 14             | 19                            | 23                        |
| <b>F</b>        | 11           | 11         | 11           | 11             | 13                            | 14                        |
| <b>Subtotal</b> | <b>75</b>    | <b>71</b>  | <b>73</b>    | <b>67</b>      | <b>85</b>                     | <b>87</b>                 |
| <b>Total</b>    | <b>359</b>   | <b>359</b> | <b>382</b>   | <b>310</b>     | <b>431</b>                    | <b>438</b>                |

**Table S1 B. List of nGPCR gene inventory in human, rat, mouse, chicken, *T. nigroviridis*, and *T. rubripes*.**

**Class A  
Subclass A1**

| Gene Name       | Human Gene ID | Rat           | Mouse        | Chicken                             | <i>T. nigroviridis</i>                                               | <i>T. rubripes</i>                                                                                                                                   |
|-----------------|---------------|---------------|--------------|-------------------------------------|----------------------------------------------------------------------|------------------------------------------------------------------------------------------------------------------------------------------------------|
| GPR26           | 2849          | NP_620196     | NP_775586    | XP_421809                           | CAG00716<br>CAG03282                                                 | FRUP00000148603<br>FRUP00000160817                                                                                                                   |
| GPR50           | 9248          | XP_346375     | NP_034470    | NP_990692                           | CAF99125                                                             | FRUP00000153084                                                                                                                                      |
| GPR61           | 83873         | XP_227581     | NP_780679    | NW_060850                           | CAG06826<br>CAG07504                                                 |                                                                                                                                                      |
| GPR62           | 118442        | XP_576464     | XP_488192    |                                     | CAG06806<br>CAG06960                                                 | FRUP00000149305                                                                                                                                      |
| GPR78           | 27201         |               |              | XP_426354                           | GSTENT00035915001<br>CAG05074                                        | FRUP00000132645<br>FRUP00000158903                                                                                                                   |
| GPR84           | 53831         | GeneID_367000 | NP_109645    |                                     | CAG06758                                                             | FRUP00000162610                                                                                                                                      |
| GPR101          | 83550         | XP_229186     | XP_141764    |                                     | CAG09823<br>SCAF13862                                                | FRUP00000144472                                                                                                                                      |
| GPR135          | 64582         | NP_861436     | NP_861417    | XP_426475                           | CAF98168                                                             | FRUP00000151143                                                                                                                                      |
| MTNR1A          | 4543          | XP_341442     | NP_032665    | NP_990693                           | CAF96594<br>CAG04524                                                 | FRUP00000158716<br>FRUP00000160445                                                                                                                   |
| MTNR1B          | 4544          | XP_345900     | NP_663758    | XP_417201                           | SCAF14601                                                            | FRUP00000141583                                                                                                                                      |
| OPN1LW          | 5956          |               | GeneID_20164 | NP_990771<br>NP_990740              | CAF96877                                                             | FRUP00000164823                                                                                                                                      |
| OPN1MW-fish     |               |               |              |                                     | CAG06878<br>CAG08706<br>CAG10163                                     | FRUP00000141947<br>FRUP00000144085<br>FRUP00000151874                                                                                                |
| OPN1MW          | 2652          | NP_446000     | NP_032132    |                                     |                                                                      |                                                                                                                                                      |
| OPN1SW          | 611           | NP_112277     | NP_031564    |                                     | CAF96876                                                             | FRUP00000164822                                                                                                                                      |
| OPN3            | 23596         |               | NP_034228    | XP_426139<br>XP_425584              | CAF89728<br>CAF97626<br>CAG08854<br>CAG09827                         | FRUP00000131360<br>FRUP00000140941<br>FRUP00000143705<br>FRUP00000155686                                                                             |
| OPN4            | 94233         | NP_620215     | NP_038915    | XP_421494<br>NP_989956              | CAF90276<br>CAF96662<br>CAF99228<br>CAG08413                         | FRUP00000141781<br>FRUP00000141782<br>FRUP00000145811<br>FRUP00000145812<br>FRUP00000149714<br>FRUP00000163792                                       |
| OPN5/GPR136     | 221391        | NP_861437     | NP_861418    | XP_426228<br>XP_420056<br>XP_419178 | CAF91597<br>CAG09534<br>CAG03922<br>CAG11258<br>CAG13006<br>CAG00077 | FRUP00000133622<br>FRUP00000139290<br>FRUP00000145353<br>FRUP00000149081<br>FRUP00000154669<br>FRUP00000162507<br>FRUP00000164504<br>FRUP00000165286 |
| RE2/GPR161      | 23432         | XP_222837     | XP_136361    | XP_416594                           | CAG05829<br>CAG09451                                                 | FRUP00000138055<br>FRUP00000148240                                                                                                                   |
| RGR             | 5995          | XP_224673     | NP_067315    | XP_421504                           | CAF98663<br>CAG13313                                                 | FRUP00000142438<br>FRUP00000148015                                                                                                                   |
| RHO             | 6010          | NP_254276     | NP_663358    | XP_414454<br>NP_990821              | CAG06941<br>CAG11315<br>CAG11334                                     | FRUP00000136321<br>FRUP00000136323<br>FRUP00000156773<br>scaffold_200                                                                                |
| RRH             | 10692         | XP_227718     | NP_033128    | XP_420649                           | CAF94915                                                             | FRUP00000130657                                                                                                                                      |
| <b>Subtotal</b> | <b>20</b>     | <b>17</b>     | <b>19</b>    | <b>21</b>                           | <b>43</b>                                                            | <b>44</b>                                                                                                                                            |

| Gene Name          | Human Gene ID | Rat       | Mouse        | Chicken                | <i>T. nigroviridis</i>           | <i>T. rubripes</i>                                    |
|--------------------|---------------|-----------|--------------|------------------------|----------------------------------|-------------------------------------------------------|
| <b>Subclass A2</b> |               |           |              |                        |                                  |                                                       |
| ADORA1             | 134           | NP_058851 | NP_001008533 | NP_989647              | CAF96797<br>CAG11815<br>CAG07486 | FRUP00000128561<br>FRUP00000143490                    |
| ADORA2A            | 135           | NP_445746 | NP_033760    | XP_425280              | CAF93754<br>CAG02468             | FRUP00000141222<br>FRUP00000142941<br>FRUP00000144716 |
| ADORA2B            | 136           | NP_058857 | NP_031439    | NP_990418              | CAF98510<br>CAG09178             | FRUP00000154463                                       |
| ADORA3             | 140           | NP_037028 | NP_033761    | NP_989482              | CAG11816                         | FRUP00000149785                                       |
| ADRA1A             | 148           | NP_058887 | NP_038489    | XP_425762              | CAG11192                         | FRUP00000141240                                       |
| ADRA1B             | 147           | NP_058687 | NP_031442    | XP_414483              | CAF92745<br>CAF97256             | FRUP00000152462<br>FRUP00000164690                    |
| ADRA1D             | 146           | NP_077809 | NP_038488    | XP_420871              | CAF91280                         | FRUP00000140656                                       |
| ADRA2A             | 150           | NP_036871 | NP_031443    | XP_426537              | CAG01293<br>CAG05052<br>CAG05356 | FRUP00000127209<br>FRUP00000145339<br>FRUP00000154128 |
| ADRA2B             | 151           | NP_612514 | NP_033763    |                        | CAG07800                         | FRUP00000129228                                       |
| ADRA2C             | 152           | NP_612515 | NP_031444    | XP_426355<br>XP_425203 | CAG00720<br>CAG03287             | FRUP00000136842<br>FRUP00000158905                    |
| ADRA2D-fish        |               |           |              |                        | CAF91577                         | CAC87886<br>CAC87887                                  |
| ADRB1              | 153           | NP_036833 | NP_031445    | XP_426540              | CAG08867<br>CAG12607             | FRUP00000128218<br>FRUP00000147601                    |
| ADRB2              | 154           | NP_036624 | NP_031446    | XP_425195              | CAG10129                         | FRUP00000128843<br>FRUP00000157526                    |
| ADRB3              | 155           | NP_037240 | NP_038490    | XP_428541              |                                  |                                                       |
| CHRM1              | 1128          | NP_542951 | NP_031724    |                        | CAG10670                         | FRUP00000131048                                       |
| CHRM2              | 1129          | NP_112278 | NP_987076    | XP_416359              | CAG02408<br>CAG03403             | FRUP00000127975<br>FRUP00000129486                    |
| CHRM3              | 1131          | NP_036659 | NP_150372    | NP_990730              | CAF92462<br>CAG10073             | FRUP00000160548<br>scaffold_143                       |
| CHRM4              | 1132          | XP_345404 | NP_031725    | XP_421119              | CAG05625<br>CAG06610             | FRUP00000147533<br>FRUP00000155473                    |
| CHRM5              | 1133          | NP_059058 | NP_991352    | XP_426437              | CAG03529                         | FRUP00000130167                                       |
| DRD1               | 1812          | NP_037269 | NP_031610    | XP_425206              | CAF93510<br>CAF95884<br>CAG11724 | FRUP00000154522<br>FRUP00000164051<br>FRUP00000164859 |
| DRD2               | 1813          | NP_036679 | NP_034207    | XP_425811              | CAF92229<br>CAF97490<br>CAG13001 | FRUP00000129665<br>FRUP00000143523<br>FRUP00000153968 |
| DRD3               | 1814          | NP_058836 | NP_031903    | XP_416570              | CAG04235                         | scaffold_146                                          |
| DRD4               | 1815          | NP_037076 | NP_031904    | XP_420947              | CAF95731<br>CAF98376             | FRUP00000142755<br>FRUP00000149812                    |
| DRD5               | 1816          | NP_036900 | NP_038531    | XP_426518<br>XP_426351 | CAF90994<br>CAG02007             | FRUP00000131890<br>FRUP00000138676                    |
| GPR21              | 2844          | XP_231251 | NP_796357    | XP_415391              | CAF93159<br>CAG09652             | FRUP00000163990                                       |

| Gene Name           | Human Gene ID | Rat                    | Mouse                     | Chicken                | <i>T. nigroviridis</i>                                                                       | <i>T. rubripes</i>                                                                                                              |
|---------------------|---------------|------------------------|---------------------------|------------------------|----------------------------------------------------------------------------------------------|---------------------------------------------------------------------------------------------------------------------------------|
| GPR22               | 2845          | XP_234041              | NP_780400                 | XP_001231969           | CAF89181<br>CAF96769<br>CAG02014<br>CAG08711                                                 | FRUP00000133859<br>FRUP00000162183<br>FRUP00000163060<br>scaffold_374                                                           |
| GPR52               | 9293          | NW_047398              | XP_890263                 | NP_001012941           | CAG00742                                                                                     | FRUP00000163527                                                                                                                 |
| GPR57g/GPR57/ TAAR3 | 9288          | NP_001009532           | NP_001008429              |                        |                                                                                              |                                                                                                                                 |
| GPR58/TAAR2         | 9287          | NP_001008512           | NP_001007267              | XP_427716              | CAF94065                                                                                     | FRUP00000131967                                                                                                                 |
| GPR75               | 10936         | XP_573685              | NP_780699                 | XP_426099              | SCAF15006                                                                                    | scaffold_905                                                                                                                    |
| GPR88               | 54112         | NP_113884              | NP_071872                 | XP_001232659           |                                                                                              |                                                                                                                                 |
| GPR119              | 139760        | NP_861435              | NP_861416                 | XP_426720<br>XP_426248 | CAF97243                                                                                     | FRUP00000143792                                                                                                                 |
| GPR160              | 26996         | NP_001020318           | XP_130823                 | XP_422799              |                                                                                              |                                                                                                                                 |
| HRH1                | 3269          | NP_058714              | NP_032311                 | XP_425153              | CAG07054                                                                                     | FRUP00000164084                                                                                                                 |
| HRH2                | 3274          | NP_037097              | NP_001010973              | XP_425208              | CAG01551<br>CAG04750                                                                         | FRUP00000131597<br>FRUP00000138905                                                                                              |
| HRH3                | 11255         | NP_445958              | NP_598610                 | XP_425705<br>XP_425117 |                                                                                              | FRUP00000146131<br>FRUP00000165198                                                                                              |
| HRH4                | 59340         | NP_571984              | NP_694727                 | XP_426079<br>XP_414481 | CAG07613<br>CAG10949                                                                         |                                                                                                                                 |
| HTR1A               | 3350          | NP_036717              | NP_032334                 | XP_429136              | CAF91711<br>CAF93441                                                                         | FRUP00000136865<br>FRUP00000154633                                                                                              |
| HTR1B               | 3351          | NP_071561              | NP_034612                 | XP_419875              | CAF89927                                                                                     | FRUP00000161510                                                                                                                 |
| HTR1D               | 3352          | NP_036984              | NP_032335                 | XP_001232312           | CAG10464                                                                                     | FRUP00000127520                                                                                                                 |
| HTR1E               | 3354          |                        |                           | XP_001235179           |                                                                                              |                                                                                                                                 |
| HTR1F               | 3355          | NP_068629              | NP_032336                 | XP_425535              | CAG09227                                                                                     | FRUP00000155421                                                                                                                 |
| HTR2A               | 3356          | NP_058950              | NP_766400                 | XP_425628              |                                                                                              |                                                                                                                                 |
| HTR2B               | 3357          | NP_058946              | NP_032337                 | AAF20211               | CAC85912<br>CAC86247                                                                         | FRUP00000147089                                                                                                                 |
| HTR2C               | 3358          | NP_036897              | NP_032338                 | XP_426265              | CAG12257                                                                                     | FRUP00000135888                                                                                                                 |
| HTR4                | 3360          | NP_036985              | NP_032339                 |                        | CAF93600<br>CAF95370<br>CAG04907                                                             | FRUP00000138443<br>FRUP00000140658<br>FRUP00000164424                                                                           |
| HTR5A               | 3361          | NP_037280              | NP_032340                 | XP_426604<br>XP_425970 | CAG04298                                                                                     | scaffold_934                                                                                                                    |
| HTR5B               |               | XP_341112              | NP_034613                 |                        |                                                                                              |                                                                                                                                 |
| HTR6                | 3362          | NP_077341              | NP_067333                 | XP_427576              | CAG01704                                                                                     | FRUP00000139170<br>FRUP00000139171                                                                                              |
| HTR7                | 3363          | NP_075227              | NP_032341                 | XP_421666<br>XP_420880 | CAG05134<br>CAG09680                                                                         | FRUP00000139991<br>FRUP00000144402<br>FRUP00000144993                                                                           |
| PNRe/PNR/TAAR5      | 9038          | NP_001009650           | NP_001009574<br>NP_038736 | XP_419740              |                                                                                              |                                                                                                                                 |
| TRAR1/Tar1/TAAR1    | 134864        | NP_599155<br>NP_783173 | NP_444435                 |                        | CAF91012<br>CAF92549<br>CAF92550<br>CAF92551<br>CAF93538<br>CAF93617<br>CAF93618<br>CAF94841 | FRUP00000131749<br>FRUP00000138381<br>FRUP00000150777<br>FRUP00000150779<br>FRUP00000154655<br>FRUP00000157293<br>scaffold_2245 |

| Gene Name                       | Human Gene ID | Rat                                                                                                     | Mouse                                                                                        | Chicken   | <i>T. nigroviridis</i><br>CAF95185<br>CAF95186<br>CAF95187<br>CAF96106<br>CAG13003 | <i>T. rubripes</i>                 |
|---------------------------------|---------------|---------------------------------------------------------------------------------------------------------|----------------------------------------------------------------------------------------------|-----------|------------------------------------------------------------------------------------|------------------------------------|
| TRAR3/TAR3                      | 134860        | NP_783175<br>NP_783176<br>NP_001009975<br>NP_783181<br>NP_783180<br>NP_783178<br>NP_783177<br>NP_783192 | NP_001010831<br>NP_001010827<br>NP_001010829<br>NP_001010835<br>NP_001010838<br>NP_001010839 |           |                                                                                    |                                    |
| TRAR4/TAR4/TAAR6                | 319100        | NP_783174                                                                                               | NP_001010828<br>NP_001008499                                                                 |           |                                                                                    | FRUP00000157578<br>FRUP00000135638 |
| TRAR5/GPR102/TA5/<br>TAR5/TAAR8 | 83551         | NP_783189<br>NP_783191<br>NP_783190                                                                     | NP_001010830<br>NP_001010840<br>NP_001010837                                                 |           |                                                                                    |                                    |
| <b>Subtotal</b>                 | <b>53</b>     | <b>63</b>                                                                                               | <b>62</b>                                                                                    | <b>52</b> | <b>84</b>                                                                          | <b>81</b>                          |

### Subclass A3

|           |       |              |              |              |                                  |                                                 |
|-----------|-------|--------------|--------------|--------------|----------------------------------|-------------------------------------------------|
| CNR1      | 1268  | NP_036916    | NP_031752    | XP_426191    | CAG09211<br>CAG10478             | FRUP00000157187<br>CAA64174                     |
| CNR2      | 1269  | NP_065418    | NP_034054    | XP_425791    | CAF91752                         | FRUP00000161224                                 |
| EDG1      | 1901  | NP_058997    | NP_031927    | XP_422305    | CAF90490                         | scaffold_6096                                   |
| EDG2      | 1902  | NP_446388    | NP_034466    | XP_424918    | CAF89669<br>CAF90900<br>CAF92197 | FRUP00000154449<br>scaffold_86                  |
| EDG3      | 1903  | XP_225216    | NP_034231    | XP_428818    | CAG07943<br>CAG12442             | FRUP00000154122<br>scaffold_270<br>scaffold_270 |
| EDG4      | 9170  | XP_573887    | NP_064412    | XP_423763    |                                  | scaffold_799                                    |
| EDG5      | 9294  | NP_058888    | NP_034463    |              | SCAF15050<br>chr3_11567980_8876  | scaffold_180                                    |
| EDG6      | 8698  | XP_234930    | NP_034232    | XP_428050    |                                  | scaffold_203                                    |
| EDG7      | 23566 | NP_076459    | NP_075359    | XP_422368    | CAG08072                         | FRUP00000148649                                 |
| EDG8      | 53637 | NP_068543    | NP_444420    |              | CAF92590                         | FRUP00000139298                                 |
| GPR12     | 2835  | NP_110458    | NP_001010941 | XP_425637    | CAG04221<br>CAG12255             | FRUP00000158473                                 |
| GPR3      | 2827  | NP_714949    | NP_032180    |              | CAF88618                         | FRUP00000160201                                 |
| GPR6      | 2830  | NP_113994    | NP_951013    | XP_426182    | CAG03572                         | FRUP00000134973                                 |
| MC1R/MSHR | 4157  | EDL92809     | NP_032585    | XP_425135    | AAQ55176                         | AAO65548                                        |
| MC2R      | 4158  | XP_574167    | NP_032586    | XP_426070    | CAF95601                         |                                                 |
| MC3R      | 4159  | NP_001020441 | NP_032587    | NP_001026186 |                                  |                                                 |
| MC4R      | 4160  | NP_037231    | NP_058673    | XP_426042    | AAQ55178                         | AAO65551                                        |
| MC5R      | 4161  | NP_037314    | NP_038624    | NP_001026186 | AAQ55179                         | AAO65553                                        |
| PTGDR     | 5729  | NP_071577    | NP_032988    |              |                                  |                                                 |
| PTGER1    | 5731  | NP_037232    | NP_038669    |              |                                  |                                                 |
| PTGER2    | 5732  | NP_112350    | NP_032990    | XP_426485    | CAG00989                         | scaffold_1339                                   |

| Gene Name       | Human Gene ID | Rat       | Mouse     | Chicken      | <i>T. nigroviridis</i>                       | <i>T. rubripes</i>                                                       |
|-----------------|---------------|-----------|-----------|--------------|----------------------------------------------|--------------------------------------------------------------------------|
| PTGER3          | 5733          | NP_036836 | NP_035326 | XP_426672    | CAG01184                                     | FRUP00000131256                                                          |
| PTGER4          | 5734          | NP_114465 | NP_032991 | XP_424770    | CAF95032<br>CAF96390<br>CAF97110<br>CAG09586 | FRUP00000155267<br>FRUP00000157769<br>FRUP00000161139<br>FRUP00000162687 |
| PTGFR           | 5737          | NP_037247 | NP_032992 | NP_001038122 | CAG03303                                     | FRUP00000149163<br>FRUP00000151130                                       |
| PTGIR           | 5739          | XP_218457 | NP_032993 |              | SCAF14537                                    | FRUP00000130879                                                          |
| TBXA2R          | 6915          | NP_058750 | NP_033351 |              | CAG00626                                     | FRUP00000152568                                                          |
| <b>Subtotal</b> | <b>26</b>     | <b>26</b> | <b>26</b> | <b>19</b>    | <b>30</b>                                    | <b>30</b>                                                                |

#### Subclass A4

|              |       |              |               |                        |                                  |                                                       |
|--------------|-------|--------------|---------------|------------------------|----------------------------------|-------------------------------------------------------|
| ADMR         | 11318 | NP_445754    | NP_031438     |                        | CAF90054                         | FRUP00000146637                                       |
| CMKOR1/RDC1  | 57007 | NP_445804    | NP_031748     | XP_426554              | CAG05877                         | scaffold_387                                          |
| CYSLTR1      | 10800 | NP_446093    | NP_067451     | XP_426249              | SCAF7335                         | FRUP00000150747                                       |
| CYSLTR2      | 57105 | NP_596904    | NP_598481     | XP_425629              |                                  |                                                       |
| EBI2         | 1880  |              | NP_898852     | XP_428804              | CAG07299<br>chr2_7825313-7877092 | FRUP00000150142<br>FRUP00000161432                    |
| F2R          | 2149  | NP_037082    | NP_034299     | XP_424799              | CAG07882                         | FRUP00000152221                                       |
| F2RL1        | 2150  | NP_446349    | NP_032000     | NP_001012626           | CAG05264<br>CAG05265             | FRUP00000130845<br>FRUP00000130847                    |
| F2RL2        | 2151  | NP_445765    | NP_034300     | XP_414523              | CAG05266<br>CAG07880             | FRUP00000151261<br>FRUP00000129585<br>FRUP00000130849 |
| F2RL3        | 9002  | NP_446260    | NP_032001     | XP_418256              | CAF95426                         | chrUn_311834154-530                                   |
| GPR18        | 2841  |              | NP_877958     | NW_060236              | CAG07300                         | FRUP00000150143                                       |
| GPR20        | 2843  | NP_071552    | NP_775541     | XP_425941              | CAF99361<br>CAG11945             | FRUP00000136628<br>FRUP00000165047                    |
| GPR23        | 2846  | XP_228501    | NP_780480     | XP_425741<br>XP_420150 | CAF90112<br>CAG03809             | FRUP00000150750                                       |
| GPR31        | 2853  | XP_217867    | GeneID_107431 |                        |                                  |                                                       |
| GPR34        | 2857  | NP_001020096 | NP_035953     | XP_420190              | SCAF14978                        | scaffold_1642                                         |
| GPR35        | 2859  | NP_001032436 | NP_071715     | XP_422645              |                                  |                                                       |
| GPR4         | 2828  | NP_001020851 | NP_783599     |                        | CAF97465<br>CAG12733             | FRUP00000128368<br>FRUP00000135821                    |
| GPR40        | 2864  | NP_695216    | NP_918946     |                        |                                  |                                                       |
| GPR41        | 2865  | XP_344881    | XP_145470     |                        | CAF89689                         | FRUP00000153029                                       |
| GPR42a/GPR42 | 2866  |              |               |                        |                                  |                                                       |
| GPR43        | 2867  | NP_001005877 | NP_666299     | XP_428780<br>XP_426943 | CAF93280<br>CAG03362             | FRUP00000129763<br>FRUP00000161234                    |
| GPR55        | 9290  | AAD22411     | NP_001028462  |                        |                                  |                                                       |
| GPR65        | 8477  | XP_234367    | NP_032178     | XP_421305              | SCAF15019                        | FRUP00000150188                                       |
| GPR68        | 8111  | XP_234483    | NP_780702     | XP_426459              | CAF99011                         | FRUP00000136318                                       |
| GPR81        | 27198 | XP_001072594 | NP_780729     |                        |                                  |                                                       |
| GPR82        | 27197 |              | NP_783600     | NW_060226              |                                  |                                                       |
| GPR87        | 53836 | XP_227177    | NP_115775     | XP_422840              |                                  |                                                       |

| Gene Name       | Human Gene ID | Rat          | Mouse        | Chicken                | <i>T. nigroviridis</i>           | <i>T. rubripes</i>                                                       |
|-----------------|---------------|--------------|--------------|------------------------|----------------------------------|--------------------------------------------------------------------------|
| GPR92           | 57121         | XP_575667    | XP_355812    | XP_416504              |                                  |                                                                          |
| GPR109A/HM74a   | 338442        | NP_852141    | NP_109626    |                        | CAF90987<br>CAG05298<br>CAG08446 | FRUP00000136429<br>FRUP00000146889<br>FRUP00000148806<br>FRUP00000150723 |
| GPR109B/HM74    | 8843          |              |              |                        |                                  |                                                                          |
| GPR132/G2A      | 29933         | XP_234574    | NP_064309    | XP_426469              |                                  |                                                                          |
| GPR141/PGR13    | 353345        | NP_861432    | NP_861419    | XP_418832              | SCAF14544                        | scaffold_240                                                             |
| GPR17           | 2840          | NW_047510    | AAH70439     |                        | CAG04290<br>CAG05650             | FRUP00000128875<br>FRUP00000147658                                       |
| GPR171/H963     | 29909         |              | NP_775574    | XP_422842              |                                  |                                                                          |
| GPR174/FKSG79   | 84636         | XP_228495    | NP_001028423 | NP_001008464           | CAG14148                         | scaffold_1393                                                            |
| OXER1/TG1019    | 165140        |              |              |                        |                                  |                                                                          |
| OXGR1/GPR80     | 27199         | NP_997471    | NP_001001490 | XP_425595<br>XP_425594 | CAG04953                         | FRUP00000159316                                                          |
| P2RY1           | 5028          | NP_036932    | NP_032798    | XP_427676<br>NP_990664 | CAF97378<br>CAG03842             | FRUP00000138058                                                          |
| P2RY10          | 27334         | XP_228500    | NP_766023    | XP_420149<br>XP_420148 |                                  |                                                                          |
| P2RY11          | 5032          |              |              |                        | CAG12186                         | FRUP00000147765                                                          |
| P2RY12          | 64805         | NP_073637    | NP_081847    | XP_422839              | CAF97387                         | FRUP00000138083                                                          |
| P2RY13/GPR86    | 53829         | NP_001002853 | NP_083084    |                        | CAF97388                         | scaffold_239                                                             |
| P2RY14/GPR105   | 9934          | NP_598261    | NP_573463    | XP_422841              | SCAF14677                        |                                                                          |
| P2RY2           | 5029          | NP_058951    | NP_032799    | XP_425667              | CAG00917<br>CAF97358             | FRUP00000127686<br>FRUP00000141264<br>FRUP00000165330                    |
| P2RY4           | 5030          | NP_113868    | NP_065646    | XP_420157              | CAG09809                         | FRUP00000163721                                                          |
| P2RY6           | 5031          | NP_476465    | NP_898991    | NP_990526              | CAG00913                         | FRUP00000151445                                                          |
| P2RY8           | 286530        |              |              | NP_001008679           |                                  | FRUP00000139369                                                          |
| P2Y5/P2RY5      | 10161         | NW_047454    | NP_780325    | NP_990530              | CAG02919<br>CAG12785             | FRUP00000141960                                                          |
| PTAFR           | 5724          | NP_445773    | XP_357441    | XP_425768              | CAG10424                         | FRUP00000134471                                                          |
| SUCNR1/GPR91    | 56670         | XP_579061    | NP_115776    | XP_422836              | CAF97381                         | FRUP00000138067                                                          |
| <b>Subtotal</b> | <b>49</b>     | <b>40</b>    | <b>44</b>    | <b>40</b>              | <b>46</b>                        | <b>46</b>                                                                |

#### Subclass A5

|          |     |           |           |                        |                      |                                    |
|----------|-----|-----------|-----------|------------------------|----------------------|------------------------------------|
| AVPR1A   | 552 | NP_444178 | NP_058543 | XP_425436              | CAF96006<br>CAG12390 | FRUP00000141525<br>FRUP00000161762 |
| AVPR1B   | 553 | NP_058901 | NP_036054 | XP_425822<br>XP_425434 | CAF96931             | scaffold_8423                      |
| AVPR2    | 554 | NP_062009 | NP_062277 |                        | CAG03798<br>CAG07446 | FRUP00000161883<br>scaffold_323    |
| BRS3     | 680 | NP_690058 | NP_033896 | NP_989737              |                      |                                    |
| CCKAR    | 886 | NP_036820 | NP_033957 | XP_420751              | CAG04576             | FRUP00000133099                    |
| CCKBR    | 887 | NP_037297 | NP_031653 | NP_001001742           |                      |                                    |
| CCK-fish |     |           |           |                        | CAG00996             | FRUP00000135669<br>FRUP00000162216 |

| Gene Name                    | Human Gene ID | Rat       | Mouse     | Chicken                                   | <i>T. nigroviridis</i><br>CAG05857                       | <i>T. rubripes</i><br>FRUP00000162217                                                       |
|------------------------------|---------------|-----------|-----------|-------------------------------------------|----------------------------------------------------------|---------------------------------------------------------------------------------------------|
| EDNRA                        | 1909          | NP_036682 | NP_034462 | NP_989450                                 | CAG02202<br>CAG11066                                     | FRUP00000133802<br>FRUP00000133804<br>FRUP00000133807<br>FRUP00000157593<br>FRUP00000157598 |
| EDNRB                        | 1910          | NP_059029 | NP_031930 | XP_417001<br>NP_989451                    | CAF90114<br>CAF97649<br>CAG05905                         | FRUP00000141004<br>FRUP00000141006<br>FRUP00000150746<br>FRUP00000163212                    |
| FSHR                         | 2492          | NP_954707 | NP_038551 | NP_990410                                 | CAF91019                                                 | scaffold_49                                                                                 |
| GNRHR                        | 2798          | NP_112300 | NP_034453 | NP_989984                                 |                                                          |                                                                                             |
| GNRHR2                       | 114814        |           |           | NP_001012627                              | CAF92557<br>CAF93245<br>CAG00826<br>CAG03087<br>CAG13098 | FRUP00000134302<br>FRUP00000138360<br>FRUP00000141711<br>FRUP00000156324<br>FRUP00000160897 |
| GPR <sub>e</sub> /GPR/GPR176 | 11245         | XP_342494 | NP_958755 | XP_426435                                 | CAG03525                                                 | FRUP00000131045                                                                             |
| GPR10                        | 2834          | NP_631932 | NP_963909 | XP_428805<br>NP_001019756<br>NP_001012295 | CAF97466<br>CAF99282                                     | FRUP00000135820<br>FRUP00000165587                                                          |
| GPR19                        | 2842          | NP_542146 | NP_032183 | XP_428465                                 | CAF90680                                                 | FRUP00000131864                                                                             |
| GPR27                        | 2850          | NP_075587 | NP_032184 |                                           |                                                          |                                                                                             |
| GPR37                        | 2861          | NP_476549 | NP_034468 | XP_415992                                 | CAG01068                                                 | FRUP00000137022<br>FRUP00000140117<br>scaffold_2384<br>scaffold_3299                        |
| GPR37L1/ET(B)R-LP-2          | 9283          | XP_573457 | NP_602320 | XP_419256                                 | SCAF7416                                                 | FRUP00000136126<br>FRUP00000142342                                                          |
| GPR45                        | 11250         | XP_237112 | NP_444337 |                                           | CAG05802                                                 | FRUP00000163802                                                                             |
| GPR63                        | 81491         | XP_232847 | NP_109658 | XP_426189                                 | CAF93484                                                 | FRUP00000149653                                                                             |
| GPR73/PKR1                   | 10887         | NP_620433 | NP_067356 | XP_419333                                 | CAF98618                                                 | FRUP00000139538<br>FRUP00000154172                                                          |
| GPR73L1/PKR2                 | 128674        | NP_620434 | NP_659193 | XP_419334                                 |                                                          |                                                                                             |
| GPR74/NPFF receptor 2        | 10886         | NP_076470 | NP_573455 | XP_426315                                 | CAF97104<br>CAG07773                                     | FRUP00000155275<br>FRUP00000155634                                                          |
| GPR83                        | 10888         | NP_536336 | NP_034417 | XP_426254<br>XP_425651                    | CAG06215                                                 | FRUP00000164362                                                                             |
| GPR85                        | 54329         | NP_071590 | NP_659503 | XP_416019                                 | CAG12125                                                 | FRUP00000143116                                                                             |
| GPR103/QRFP                  | 84109         | NP_937842 | NP_780733 | XP_420626                                 | CAG04805<br>SCAF14750                                    | FRUP00000142516                                                                             |
| GPR147/NPFFR1                | 64106         | NP_071627 | XP_137119 | NP_989693                                 | CAG09719                                                 | FRUP00000157824                                                                             |
| GPR150/PGR11                 | 285601        | XP_574811 | NP_780704 |                                           |                                                          |                                                                                             |
| GPR154/NPS receptor          | 387129        | XP_235968 | NP_783609 | XP_426022                                 |                                                          |                                                                                             |
| GPR173/SREB3                 | 54328         | NP_071591 | NP_081819 | XP_414427                                 | CAF93024<br>CAF96921<br>CAG03946                         | FRUP00000150812<br>FRUP00000153190<br>FRUP00000155856                                       |
| GRPR                         | 2925          | NP_036838 | NP_032203 | NP_989738                                 | CAF99824<br>CAG05835                                     | FRUP00000156510<br>FRUP00000161978                                                          |
| HCRTR1                       | 3061          | NP_037196 | NP_945197 |                                           |                                                          |                                                                                             |
| HCRTR2                       | 3062          | NP_037206 | NP_945200 | NP_001019755                              | CAG09420                                                 | FRUP00000163192                                                                             |



| Gene Name             | Human Gene ID | Rat          | Mouse     | Chicken                | <i>T. nigroviridis</i>           | <i>T. rubripes</i>                                    |
|-----------------------|---------------|--------------|-----------|------------------------|----------------------------------|-------------------------------------------------------|
| LGR4                  | 55366         | NP_775450    | XP_355385 | XP_426162              | CAF99699                         | scaffold_826                                          |
| LGR5                  | 8549          | XP_235149    | NP_034325 | XP_425441              | CAG14806                         | FRUP00000149831                                       |
| LGR6                  | 59352         | XP_573455    | XP_283647 | XP_419253              | CAG07358                         | FRUP00000148236<br>FRUP00000148237                    |
| LGR7                  | 59350         | NP_958820    | NP_997617 | XP_426253              | CAG04641                         | scaffold_1619                                         |
| LGR8                  | 122042        | XP_344074    | NP_569720 |                        | CAG00416                         | FRUP00000159568                                       |
| LHCGR                 | 3973          | NP_037110    | NP_038610 | NP_990267              | CAF91017<br>CAG09466             |                                                       |
| NMBR                  | 4829          | NP_036931    | NP_032729 | XP_426167              | CAF94959<br>CAG14163             | FRUP00000150118<br>GSTENT00011415001                  |
| NPY1R                 | 4886          | NP_001013050 | NP_035064 | XP_426285              |                                  |                                                       |
| NPY2R                 | 4887          | NP_076458    | NP_032757 | XP_420373<br>XP_414599 | CAF96589<br>SCAF14573            | FRUP00000138240<br>DAA05226                           |
| NPY5R                 | 4889          | NP_037001    | NP_057917 | XP_420388              | CAG02528<br>CAG05410             | FRUP00000160782<br>FRUP00000160783                    |
| NPY6R/NPY1RL/PP2/ Y2B | 4888          |              | NP_035065 |                        |                                  |                                                       |
| OXTR                  | 5021          | NP_037003    | XP_144956 | XP_426768              | CAG06809<br>CAG06958             | FRUP00000127611<br>FRUP00000149294                    |
| PPYR1                 | 5540          | NP_113769    | NP_032945 | XP_426511              | CAG09405                         | FRUP00000164394                                       |
| TACR1                 | 6869          | NP_036799    | NP_033339 | NP_990199              | CAG05392<br>CAG12579             | FRUP00000138587<br>FRUP00000148382<br>FRUP00000160726 |
| TACR2                 | 6865          | NP_542946    | NP_033340 | XP_426496              |                                  |                                                       |
| TACR3                 | 6870          | NP_058749    | NP_067357 | XP_001232174           | CAG01274<br>CAG11520<br>CAG05682 | FRUP00000132595<br>FRUP00000135143<br>FRUP00000147917 |
| TSHR                  | 7253          | NP_037020    | NP_035778 | XP_426455              | CAG00111                         | FRUP00000145651                                       |
| <b>Subtotal</b>       | <b>49</b>     | <b>47</b>    | <b>48</b> | <b>48</b>              | <b>63</b>                        | <b>72</b>                                             |

#### Subclass A6

|                 |          |                        |                        |                        |                                  |                                                       |
|-----------------|----------|------------------------|------------------------|------------------------|----------------------------------|-------------------------------------------------------|
| GHSR            | 2693     | NP_114464              | NP_796304              | NP_989725              | CAF95899                         | FRUP00000131849                                       |
| GPR39           | 2863     | DAA06056               | AAH85285               | XP_422128              | CAG11238                         | FRUP00000135301                                       |
| MLNR/GPR38      | 2862     |                        |                        | XP_425630              | CAG12790                         | FRUP00000138615                                       |
| NMUR1           | 10316    | NP_075588              | NP_034471              | XP_426705              | CAF97543<br>CAG03466             | FRUP00000153653<br>FRUP00000156953                    |
| NMUR2/NMU2R     | 56923    | NP_071611              | NP_694719              | XP_425209              | CAG03508                         | FRUP00000147487                                       |
| NTSR1           | 4923     | XP_345485              | NP_061236              | XP_425707              | CAF89857                         | FRUP00000128303                                       |
| NTSR2           | 23620    | NP_073186              | NP_032773              |                        |                                  |                                                       |
| TRHR            | 7201     | NP_037179<br>NP_852029 | NP_038724<br>NP_573465 | XP_425702<br>NP_990261 | CAF92799<br>CAF96270<br>CAG03888 | FRUP00000134073<br>FRUP00000146669<br>FRUP00000153993 |
| <b>Subtotal</b> | <b>8</b> | <b>8</b>               | <b>8</b>               | <b>8</b>               | <b>10</b>                        | <b>10</b>                                             |

#### Subclass A7

|        |     |           |                        |           |                      |                                    |
|--------|-----|-----------|------------------------|-----------|----------------------|------------------------------------|
| AGTR1  | 185 | NP_112271 | NP_796296<br>NP_780295 | NP_990488 | CAG04270             | FRUP00000150672                    |
| AGTR2  | 186 | NP_036626 | NP_031455              | XP_426266 | CAG08373             | scaffold_1395                      |
| AGTRL1 | 187 | NP_112639 | NP_035914              | XP_425289 | CAF90289<br>CAF99292 | FRUP00000134029<br>FRUP00000134030 |

| Gene Name  | Human Gene ID | Rat                                    | Mouse                                                     | Chicken                | <i>T. nigroviridis</i><br>SCAF12244 | <i>T. rubripes</i><br>FRUP00000146396<br>FRUP00000165603 |
|------------|---------------|----------------------------------------|-----------------------------------------------------------|------------------------|-------------------------------------|----------------------------------------------------------|
| BDKRB1     | 623           | NP_110478                              | NP_031565                                                 | NP_001074189           | CAG10408                            | FRUP00000150183<br>FRUP00000150187                       |
| BDKRB2     | 624           | NP_775123                              | NP_033877                                                 | XP_426461              |                                     |                                                          |
| BLR1/CXCR5 | 643           | NP_445755                              | NP_031577                                                 | NP_001026083           | CAG09055                            | FRUP00000156705                                          |
| C3AR1      | 719           | NP_114449                              | NP_033909                                                 | XP_416428              |                                     |                                                          |
| C5R1       | 728           | NP_446071                              | NP_031603                                                 |                        | CAG02859                            | FRUP00000134135                                          |
| CCBP2      | 1238          | NP_511176                              | NP_067622                                                 | XP_418499              |                                     |                                                          |
| CCR1       | 1230          | NP_065417<br>XP_236742                 | NP_034042                                                 |                        |                                     |                                                          |
| CCR2       | 1231          | NP_068638                              | NP_034045                                                 |                        |                                     |                                                          |
| CCR3       | 1232          | NP_446410                              | NP_034044                                                 |                        |                                     |                                                          |
| CCR4       | 1233          | NP_598216                              | NP_034046                                                 | XP_426017              | chr8_3997729_8596                   | FRUP00000127130                                          |
| CCR5       | 1234          | NP_446412                              | NP_034047                                                 | XP_418796<br>XP_418795 |                                     |                                                          |
| CCR6/GPR29 | 1235          | NP_001013163                           | NP_033965                                                 | XP_419608              | CAF92962                            | FRUP00000146532                                          |
| CCR7       | 1236          | NP_955783                              | NP_031745                                                 | XP_425875              | CAG06152                            | FRUP00000154746                                          |
| CCR8       | 1237          | XP_236704                              | NP_031746                                                 | XP_418819              |                                     |                                                          |
| CCR9/GPR28 | 10803         | NP_758832                              | NP_034043                                                 | XP_426014              | CAF90274<br>CAG05508                | FRUP00000142615                                          |
| CCR10/GPR2 | 2826          | XP_343969                              | NP_031747                                                 |                        | chr2_1817756-1818529                | FRUP00000140298                                          |
| CCR11      | 51554         | Q9ESK1                                 | NP_663746                                                 |                        | CAF88488                            | FRUP00000138457                                          |
| CCRL2      | 9034          | XP_236658                              | NP_059494                                                 |                        |                                     |                                                          |
| CMKLR1     | 1240          | NP_071554                              | NP_032179                                                 | XP_425239<br>XP_423260 | CAF94854<br>CAF94856<br>CAG08499    | FRUP00000145765<br>FRUP00000149103<br>FRUP00000155117    |
| CX3CR1     | 1524          | NP_598218                              | NP_034117                                                 | XP_418820              | chr8_854312-855332                  | chrUn:212102004-3119                                     |
| CXCR3/GPR9 | 2833          | NP_445867                              | NP_034040                                                 |                        | CAF98051<br>CAF98053                | FRUP00000138635<br>FRUP00000138636                       |
| CXCR4      | 7852          | NP_071541                              | NP_034041                                                 | NP_989948              | CAF97662<br>CAG01848                | FRUP00000134232<br>FRUP00000137823                       |
| CXCR6      | 10663         |                                        | NP_109637                                                 | AAC23950               |                                     |                                                          |
| FPR1       | 2357          | XP_218012                              | NP_038549                                                 |                        | CAG11673                            | scaffold_3925                                            |
| FPRL1      | 2358          | XP_001057995                           | NP_032068                                                 |                        |                                     |                                                          |
| FPRL2      | 2359          | XP_218016<br>XP_218022<br>XP_001073753 | XP_622087<br>EDL38017<br>AAC34587<br>AAN63620<br>AAN63621 |                        |                                     |                                                          |
| FY         | 2532          | NW_047399                              | NP_034175                                                 |                        |                                     |                                                          |
| GALR1      | 2587          | NP_037090                              | NP_032108                                                 | XP_426066<br>XP_414080 | CAG00818<br>CAG12842                | FRUP00000149875<br>FRUP00000153302                       |
| GALR2      | 8811          | NP_062045                              | NP_034384                                                 | XP_428968              | CAG12230                            | FRUP00000158738                                          |
| GALR3      | 8484          | NP_062046                              | NP_056553                                                 |                        |                                     |                                                          |

| Gene Name              | Human Gene ID | Rat          | Mouse        | Chicken                | <i>T. nigroviridis</i>                                   | <i>T. rubripes</i>                                    |
|------------------------|---------------|--------------|--------------|------------------------|----------------------------------------------------------|-------------------------------------------------------|
| GPR1                   | 2825          | NP_037093    | NP_666362    | XP_421955              |                                                          | FRUP00000131794                                       |
| GPR15                  | 2838          | XP_221546    | XP_156321    | XP_425528              |                                                          |                                                       |
| GPR24/MCH receptor 1   | 2847          | NP_113946    | NP_660114    | XP_420129              | CAF94024                                                 | FRUP00000130394                                       |
| GPR25                  | 2848          | XP_344147    | XP_357126    |                        | CAG11769                                                 |                                                       |
| GPR30                  | 2852          | NP_598257    | NP_084047    | XP_414765              | CAG12216                                                 | FRUP00000146157                                       |
| GPR32                  | 2854          |              |              |                        |                                                          |                                                       |
| GPR33                  | 2856          | NP_001026993 | NP_032185    |                        |                                                          |                                                       |
| GPR44                  | 11251         | NP_001012070 | NP_034092    |                        | CAG03720                                                 | FRUP00000149198                                       |
| GPR54/Kiss receptor    | 84634         | NP_076482    | NP_444474    |                        | CAG06231                                                 | FRUP00000131919                                       |
| GPR7                   | 2831          | NP_001014784 | XP_136404    | XP_419201              |                                                          |                                                       |
| GPR77                  | 27202         | NP_001003710 | NP_795886    | XP_428039              |                                                          |                                                       |
| GPR8                   | 2832          |              |              | XP_425710              | SCAF14682                                                |                                                       |
| GPR120                 | 338557        | XP_215281    | NP_861413    | XP_426520              |                                                          |                                                       |
| GPR139/PGR3            | 124274        | NP_001019412 | XP_146103    | XP_428970              | CAG11412                                                 | AAP72123                                              |
| GPR142                 | 350383        | XP_577136    | NP_861414    | XP_428957              | CAG03049                                                 | AAP72122                                              |
| GPR145/MCH receptor 2  | 84539         |              |              |                        | CAF99158                                                 | FRUP00000144995                                       |
| GPR146                 | 115330        | XP_573364    | NP_084534    | XP_414764              | CAG12217                                                 | scaffold_710                                          |
| GPR151                 | 134391        | Q7TSN5       | NP_853521    |                        | CAG01252<br>CAG10137                                     | FRUP00000127188<br>scaffold_544                       |
| GPR152                 | 390212        | XP_001068404 | NP_996856    |                        |                                                          |                                                       |
| IL8RA                  | 3577          | NP_062183    | NP_839972    |                        | CAF98991                                                 | FRUP00000127720                                       |
| IL8RB                  | 3579          | NP_058879    | NP_034039    | XP_428206              | CAF98209<br>chr2_16451193_2269                           | FRUP00000131991<br>FRUP00000127485                    |
| LTB4R                  | 1241          | NP_067688    | NP_032545    | XP_425304<br>XP_413985 | CAF97025<br>CAF97026<br>SCAF14685                        | FRUP00000157228<br>FRUP00000159672<br>FRUP00000164123 |
| LTB4R2                 | 56413         | NP_446092    | NP_065236    |                        |                                                          |                                                       |
| OPRD1                  | 4985          | NP_036749    | NP_038650    |                        | CAG00040                                                 | FRUP00000153740                                       |
| OPRK1                  | 4986          | NP_058863    | NP_035141    | XP_426087              | CAG10221<br>CAG12280                                     | FRUP00000142489                                       |
| OPRL1                  | 4987          | NP_113757    | NP_035142    | XP_417424              | CAG02324                                                 | FRUP00000132165                                       |
| OPRM1                  | 4988          | NP_037203    | NP_001034741 | XP_419683              | CAG10056                                                 | FRUP00000162543                                       |
| RLN3R1/GPCR135/SALPR   | 51289         | NP_001008311 | NP_848832    | XP_429217              | CAF97176<br>CAG01356<br>CAG07748                         | FRUP00000153586<br>FRUP00000155748                    |
| RLN3R2/GPCR142/ GPR100 | 339403        |              | NP_861538    |                        | CAF89883<br>CAF99357<br>CAF99875<br>CAF99890<br>CAF91545 | FRUP00000127644<br>FRUP00000129142<br>FRUP00000136065 |
| SSTR1                  | 6751          | EDM03458     | NP_033242    | XP_001234905           |                                                          | scaffold_707                                          |
| SSTR2                  | 6752          | NP_062221    | NP_033243    | XP_425384              | CAF96985<br>CAF96986                                     | AAL32173<br>GSCT00010055001_prot<br>scaffold_1772     |

| Gene Name       | Human Gene ID | Rat       | Mouse     | Chicken                                          | <i>T. nigroviridis</i>                       | <i>T. rubripes</i>                                              |
|-----------------|---------------|-----------|-----------|--------------------------------------------------|----------------------------------------------|-----------------------------------------------------------------|
| SSTR3           | 6753          | NP_598206 | NP_033244 | NP_001019754                                     | CAF90874<br>CAG12520                         | scaffold_958<br>scaffold_927<br>scaffold_958                    |
| SSTR4           | 6754          | NP_037168 | NP_033245 | XP_426102                                        |                                              |                                                                 |
| SSTR5           | 6755          | NP_037014 | XP_139909 | XP_425241                                        | CAG06053                                     |                                                                 |
| UTS2R/GPR14     | 2837          | NP_065412 | NP_663415 | XP_425371<br>XP_425370<br>XP_425234<br>XP_416275 | CAF97882<br>CAG02581<br>CAG02582<br>CAG12512 | FRUP00000129229<br>FRUP00000164718<br>scaffold_2802             |
| XCR1/GPR5       | 2829          | XP_236740 | NP_035928 | XP_426012                                        | CAG11634<br>chrUn_120676885_7499             | FRUP00000159812<br>chrUn:277232531_5721<br>chrUn:164653540_7809 |
| CC-fish         | fish_4        |           |           |                                                  | chr8_3990155_1408                            | chrUn:197058105_9697                                            |
| <b>Subtotal</b> | <b>69</b>     | <b>67</b> | <b>71</b> | <b>51</b>                                        | <b>70</b>                                    | <b>68</b>                                                       |

### Subclass A8

|                 |           |                                                                                                                                                         |                                                                                                                                                                                                                               |                                                  |          |          |
|-----------------|-----------|---------------------------------------------------------------------------------------------------------------------------------------------------------|-------------------------------------------------------------------------------------------------------------------------------------------------------------------------------------------------------------------------------|--------------------------------------------------|----------|----------|
| MAS1            | 4142      | NP_036889                                                                                                                                               | NP_032578                                                                                                                                                                                                                     | XP_427992<br>XP_427991<br>XP_426151<br>XP_423677 |          |          |
| MAS1L           | 116511    |                                                                                                                                                         |                                                                                                                                                                                                                               |                                                  |          |          |
| MRGPRD          | 116512    | NP_001001506                                                                                                                                            | NP_987075                                                                                                                                                                                                                     |                                                  |          |          |
| MRGPRE          | 116534    | NP_001002288                                                                                                                                            | NP_780743                                                                                                                                                                                                                     |                                                  |          |          |
| MRGPRF/MRGF     | 116535    | NP_714944                                                                                                                                               | NP_663354                                                                                                                                                                                                                     |                                                  |          |          |
| MRGPRG/MRGG     | 386746    | NP_982296                                                                                                                                               | NP_987077                                                                                                                                                                                                                     |                                                  |          |          |
| MRGPRH          |           | NP_001002281                                                                                                                                            | NP_109651                                                                                                                                                                                                                     |                                                  |          |          |
| MRGX1e/MRGX1    | 259249    |                                                                                                                                                         |                                                                                                                                                                                                                               |                                                  |          |          |
| MRGX2e/MRGX2    | 117194    | NP_665730<br>NP_001002282<br>NP_001002286<br>NP_750845                                                                                                  | NP_694735<br>NP_694741<br>NP_694707<br>NP_705744<br>NP_997417<br>NP_991390<br>NP_997418<br>NP_997419<br>NP_997423<br>AX299180<br>AX299182<br>AX299184<br>AX299186<br>AX299188<br>AX299190<br>AX299192<br>AX299194<br>AX299200 |                                                  |          |          |
| rat_MrgB3       |           | NP_001002280<br>NP_001002285<br>AAQ08313<br>NP_001002287<br>NP_001002284<br>AAQ08316<br>GeneID_404639<br>NP_001002283<br>GeneID_404654<br>GeneID_404657 | NP_780740<br>NP_997420<br>NP_991364<br>NP_997421<br>NP_997422<br>NP_991379<br>AX299214                                                                                                                                        |                                                  |          |          |
| MRGX3e/MRGX3    | 117195    |                                                                                                                                                         |                                                                                                                                                                                                                               |                                                  |          |          |
| MRGX4e/MRGX4    | 117196    |                                                                                                                                                         |                                                                                                                                                                                                                               |                                                  |          |          |
| <b>Subtotal</b> | <b>10</b> | <b>20</b>                                                                                                                                               | <b>31</b>                                                                                                                                                                                                                     | <b>4</b>                                         | <b>0</b> | <b>0</b> |

| Gene Name      | Human Gene ID | Rat          | Mouse        | Chicken                | <i>T. nigroviridis</i>                                   | <i>T. rubripes</i>                                                       |
|----------------|---------------|--------------|--------------|------------------------|----------------------------------------------------------|--------------------------------------------------------------------------|
| <b>Class B</b> |               |              |              |                        |                                                          |                                                                          |
| ADCYAP1R1      | 117           | NP_598195    | NP_031433    | XP_425958<br>XP_418491 | CAF94168<br>CAF95249<br>CAF95250<br>CAG12267<br>CAG12268 | FRUP00000135842<br>FRUP00000161798<br>FRUP00000161801<br>FRUP00000161807 |
| BAI1           | 575           | XP_343261    | NP_778156    | XP_418415              | CAF97520<br>CAG10859                                     | FRUP00000164474                                                          |
| BAI2           | 576           | XP_232778    | NP_775094    | XP_423828              | CAF99436                                                 |                                                                          |
| BAI3           | 577           | XP_217367    | NP_783573    | XP_419892              | CAG09441<br>GSTENT00030703001                            | FRUP00000129349<br>FRUP00000143645<br>FRUP00000143649                    |
| CR             | 799           | NP_446268    | NP_031614    | XP_425985              | CAG11122<br>CAG13459                                     | FRUP00000144138<br>FRUP00000147908                                       |
| CLR            | 10203         | NP_036849    | NP_061252    | XP_421850              | CAF94370<br>CAF98969<br>CAG01331                         | FRUP00000145573<br>FRUP00000148605                                       |
| CD97           | 976           | NP_001012164 | NP_036055    |                        | CAG12162                                                 | FRUP00000150608                                                          |
| CELSR1         | 9620          | XP_235570    | NP_034016    | XP_423746              | CAG01167                                                 |                                                                          |
| CELSR2         | 1952          | XP_342319    | NP_059088    | XP_428195<br>XP_426750 | CAG06842                                                 | FRUP00000162857                                                          |
| CELSR3         | 1951          | NP_112610    | NP_536685    | XP_414354              | CAG03262                                                 | FRUP00000139273                                                          |
| CRHR1          | 1394          | NP_112261    | NP_031788    | NP_989652              | CAG03022                                                 | FRUP00000135485                                                          |
| CRHR2          | 1395          | NP_073205    | NP_034083    | NP_989785              |                                                          | scaffold_515                                                             |
| ELTD1          | 64123         | NP_071630    | NP_573485    | XP_422383              | CAG01189                                                 | FRUP00000131264                                                          |
| EMR1           | 2015          | NP_001007558 | NP_034260    |                        | CAG04105                                                 |                                                                          |
| EMR2           | 30817         |              |              |                        |                                                          |                                                                          |
| EMR3           | 84658         |              |              |                        |                                                          |                                                                          |
| EMR4b/EMR4     | 326342        |              | NP_631877    |                        |                                                          | scaffold_1738                                                            |
| GCGR           | 2642          | NP_742089    | NP_032127    | XP_423402              | CAG01110<br>CAG03726                                     | FRUP00000135578                                                          |
| GHRHR          | 2692          | NP_036982    | NP_001003685 | XP_418490              | CAF95846                                                 | FRUP00000146088<br>FRUP00000146089                                       |
| GIPR           | 2696          | NP_036846    | NP_001074284 |                        |                                                          |                                                                          |
| GLP1R          | 2740          | NP_036860    | NP_067307    | XP_426129              | CAG04358                                                 | FRUP00000146170                                                          |
| GLP2R          | 9340          | NP_068620    | NP_783612    | XP_425358              | CAF96232                                                 | FRUP00000147245                                                          |
| GPR56          | 9289          | NP_689448    | NP_061370    | XP_413999              | CAG00694                                                 |                                                                          |
| GPR64          | 10149         | NP_852031    | NP_848827    | XP_416810              | CAG00549<br>CAG05443                                     | FRUP00000143610<br>FRUP00000159461                                       |
| GPR97          | 222487        | XP_226243    | NP_766624    | XP_413998              |                                                          | FRUP00000158285                                                          |
| GPR110         | 266977        | XP_217359    | NP_598537    |                        |                                                          |                                                                          |
| GPR111         | 222611        | XP_236958    | XP_487485    |                        |                                                          |                                                                          |
| GPR112         | 139378        | XP_229201    | XP_141802    | XP_420232              | CAG09829<br>CAG11729                                     | FRUP00000140064<br>FRUP00000140065<br>FRUP00000159797                    |
| GPR113/PGR23   | 165082        | XP_233935    | XP_355587    |                        |                                                          | FRUP00000150114                                                          |

| Gene Name       | Human Gene ID | Rat          | Mouse        | Chicken                   | <i>T. nigroviridis</i>          | <i>T. rubripes</i>                                                       |
|-----------------|---------------|--------------|--------------|---------------------------|---------------------------------|--------------------------------------------------------------------------|
| GPR114          | 221188        | XP_240979    | XP_356118    | XP_414000                 | CAG00691                        |                                                                          |
| GPR115          | 221393        |              | XP_900079    | XP_420068                 |                                 |                                                                          |
| GPR116          | 221395        | NP_620810    | XP_283438    | XP_420066                 | CAG13000                        | FRUP00000153997                                                          |
| GPR123          | 84435         | XP_219468    | NP_803420    | XP_421695                 | CAG10157                        |                                                                          |
| GPR124          | 25960         | EDM09091     | NP_473385    | ENSGALP00000004917        | CAF90106                        | FRUP00000146680                                                          |
| GPR125          | 166647        | XP_223485    | XP_132089    | XP_420763                 | CAF90021                        | FRUP00000153701                                                          |
| GPR126          | 57211         | XP_218313    | NP_001002268 | XP_419712                 | CAF94956                        | FRUP00000157379                                                          |
| GPR128          | 84873         | XP_221527    | NP_766413    |                           |                                 |                                                                          |
| GPR133          | 283383        | XP_001078502 | NP_001074811 | XP_415094                 |                                 | FRUP00000137738                                                          |
| GPR144          | 347088        | XP_578117    | XP_355327    | XP_415385                 | CAG01306                        | scaffold_1674                                                            |
| LPHN1           | 22859         | NP_599235    | NP_851382    | XP_422382                 | CAG06092<br>chr3_11032320_65518 |                                                                          |
| LPHN2           | 23266         | NP_075251    | NP_001074767 | XP_422209<br>XP_422381    | CAF95119<br>CAF98480            |                                                                          |
| LPHN3           | 23284         | NP_570835    | NP_941991    | XP_420575                 | CAF93446<br>CAG02284            |                                                                          |
| MASS1/VLGR1     | 84059         | XP_342370    | XP_358310    | XP_429120                 | CAG00389                        | FRUP00000164895<br>FRUP00000164896                                       |
| PTHR1           | 5745          | NP_064458    | NP_035329    | XP_425837                 | CAF98426<br>CAG12650            | FRUP00000144315<br>FRUP00000144316<br>FRUP00000162177                    |
| PTHR2           | 5746          | NP_112351    | NP_644676    | XP_418507                 | CAF97204                        | FRUP00000128587<br>FRUP00000128588                                       |
| SCTR            | 6344          | NP_112377    | NP_001012322 | XP_422120                 |                                 |                                                                          |
| VIPR1           | 7433          | NP_036817    | NP_035833    | XP_418492<br>NP_001006328 | CAF97690<br>CAG04243            | FRUP00000137925<br>FRUP00000137926<br>FRUP00000137928<br>FRUP00000140671 |
| VIPR2           | 7434          | NP_058934    | NP_033537    | NP_001014970              | CAF97773<br>CAF98740            | FRUP00000128391<br>FRUP00000158712                                       |
| <b>Subtotal</b> | <b>48</b>     | <b>44</b>    | <b>46</b>    | <b>42</b>                 | <b>53</b>                       | <b>50</b>                                                                |

### Class C

|              |        |              |           |              |                      |                                                       |
|--------------|--------|--------------|-----------|--------------|----------------------|-------------------------------------------------------|
| CASR         | 846    | NP_058692    | NP_038831 | XP_416491    | CAG00571             | BAA26122                                              |
| GABBR1       | 2550   | NP_112290    | NP_062312 |              | CAG02742             | FRUP00000145292                                       |
| GPR51/GABBR2 | 9568   | NP_113990    | XP_143750 | XP_419066    | CAG10041             | FRUP00000128923                                       |
| GPRC5A/RAI3  | 9052   | NP_001073359 | NP_852109 | XP_416200    |                      |                                                       |
| GPRC5B       | 51704  | XP_215095    | NP_071865 | XP_001233984 | CAG06055<br>CAG11409 | FRUP00000134725<br>FRUP00000143419                    |
| GPRC5C       | 55890  | XP_213518    | NP_671750 | XP_425386    | CAG00236<br>CAG03050 | FRUP00000130654<br>FRUP00000137392<br>FRUP00000164268 |
| GPRC5D       | 55507  | XP_575701    | NP_444348 |              |                      |                                                       |
| GPRC6A       | 222545 | XP_228164    | NP_694711 | XP_426177    |                      | FRUP00000133733<br>FRUP00000163538                    |
| GRM1         | 2911   | NP_058707    | NP_058672 | XP_419652    | CAG03586<br>CAG13194 | FRUP00000135014<br>FRUP00000143714                    |

| Gene Name       | Human Gene ID | Rat          | Mouse     | Chicken   | <i>T. nigroviridis</i> | <i>T. rubripes</i>                 |
|-----------------|---------------|--------------|-----------|-----------|------------------------|------------------------------------|
| GRM2            | 2912          | XP_343471    | AAO85115  | XP_425148 | CAG06804<br>CAG06963   | FRUP00000141550<br>FRUP00000149314 |
| GRM3            | 2913          | XP_001069653 | NP_862898 | XP_416842 | CAG13037               | FRUP00000129944                    |
| GRM4            | 2914          | NP_073157    | XP_196179 | XP_418031 | CAG04030               | FRUP00000150481                    |
| GRM5            | 2915          | NP_058708    | XP_149971 | NP_989469 | CAG00460               | FRUP00000140545<br>FRUP00000140546 |
| GRM6            | 2916          | NP_075209    | NP_775548 | XP_428614 | CAF89911               | FRUP00000164837                    |
| GRM7            | 2917          | NP_112302    | NP_796302 | XP_414442 | CAF96886<br>CAG11283   | FRUP00000132600<br>FRUP00000164838 |
| GRM8            | 2918          | NP_071538    | NP_032200 | XP_425426 | CAG01066<br>CAG12082   | FRUP00000147943<br>FRUP00000150688 |
| <b>Subtotal</b> | <b>16</b>     | <b>16</b>    | <b>16</b> | <b>14</b> | <b>19</b>              | <b>23</b>                          |

### Class F

|                 |           |                    |           |           |                      |                                                                     |
|-----------------|-----------|--------------------|-----------|-----------|----------------------|---------------------------------------------------------------------|
| FZD1            | 8321      | NP_067089          | NP_067432 | XP_418648 |                      |                                                                     |
| FZD2            | 2535      | NP_742032          | NP_065256 | NP_989553 | CAG02812             | FRUP00000148265                                                     |
| FZD3            | 7976      | NP_703204          | NP_067433 | XP_420029 | CAG00137<br>CAG11035 | FRUP00000137946<br>FRUP00000150170                                  |
| FZD4            | 8322      | NP_072145          | NP_032081 | NP_989430 | CAF96654             | FRUP00000140126                                                     |
| FZD5            | 7855      | NP_776210          | NP_073558 | XP_426568 | CAF94116             | FRUP00000135762                                                     |
| FZD6            | 8323      | XP_343231          | NP_032082 | XP_418372 | CAF98078             | FRUP00000130766                                                     |
| FZD7            | 8324      | XP_237191          | NP_032083 | NP_989552 | CAF91294<br>CAG01343 | FRUP00000143203                                                     |
| FZD8            | 8325      | XP_344617          | NP_032084 | XP_418566 | CAF97764<br>CAF98771 | FRUP00000148131<br>FRUP00000159741<br>scaffold_122<br>scaffold_1549 |
| FZD9            | 8326      | NP_695217          | XP_284144 | XP_425392 | CAF91428             | FRUP00000142700                                                     |
| FZD10           | 11211     | ENSRNOT00000029702 | NP_780493 | NP_989429 | CAF94498             | FRUP00000142418                                                     |
| SMO             | 6608      | NP_036939          | NP_795970 | XP_414970 | CAF97226             | FRUP00000141346                                                     |
| <b>Subtotal</b> | <b>11</b> | <b>11</b>          | <b>11</b> | <b>11</b> | <b>13</b>            | <b>14</b>                                                           |
