# Supplementary material for: GPCR Genes Are Preferentially Retained after Whole Genome Duplication
Source: PubMed Central journal article supplement (PMC2270905; doi:10.1371/journal.pone.0001903), 2008-04-02
Supplement: pone.0001903.s004.pdf [file pone.0001903.s004.pdf]

**Table S2 A. Inventory of nGPCR genes in the MRCA of tetrapods and teleosts, and the number of derived nGPCR genes in model vertebrates.**

| <b>Class</b>    | <b>MRCA</b> | <b>Human</b> | <b>Rat</b> | <b>Mouse</b> | <b>Chicken</b> | <i><b>T. nigroviridis</b></i> | <i><b>T. rubripes</b></i> |
|-----------------|-------------|--------------|------------|--------------|----------------|-------------------------------|---------------------------|
| <b>A1</b>       | 19          | 19           | 16         | 18           | 21             | 40                            | 41                        |
| <b>A2</b>       | 42          | 52           | 55         | 56           | 52             | 83                            | 79                        |
| <b>A3</b>       | 21          | 26           | 26         | 26           | 18             | 30                            | 30                        |
| <b>A4</b>       | 34          | 46           | 40         | 43           | 39             | 46                            | 46                        |
| <b>A5</b>       | 38          | 46           | 44         | 45           | 46             | 61                            | 69                        |
| <b>A6</b>       | 7           | 8            | 8          | 8            | 8              | 10                            | 10                        |
| <b>A7</b>       | 46          | 62           | 61         | 65           | 46             | 70                            | 68                        |
| <b>Subtotal</b> | <b>207</b>  | <b>259</b>   | <b>250</b> | <b>261</b>   | <b>230</b>     | <b>340</b>                    | <b>343</b>                |
| <b>B</b>        | 38          | 46           | 42         | 44           | 41             | 53                            | 50                        |
| <b>C</b>        | 14          | 16           | 16         | 16           | 14             | 19                            | 23                        |
| <b>F</b>        | 10          | 11           | 11         | 11           | 11             | 13                            | 14                        |
| <b>Total</b>    | <b>269</b>  | <b>332</b>   | <b>319</b> | <b>332</b>   | <b>296</b>     | <b>425</b>                    | <b>430</b>                |

**Table S2 B. List of nGPCR genes wherein a distinct evolutionary path can be traced from the MRCA of tetrapods and teleosts to modern species.**

**Class A**

**Subclass A1**

| MRCA   | Human gene ID;<br>accession number | Rat           | Mouse        | Chicken                             | <i>T. nigroviridis</i>                                               | <i>T. rubripes</i>                                                                                                                                   |
|--------|------------------------------------|---------------|--------------|-------------------------------------|----------------------------------------------------------------------|------------------------------------------------------------------------------------------------------------------------------------------------------|
| GPR26  | 2849; NP 703143                    | NP_620196     | NP_775586    | XP_421809                           | CAG00716<br>CAG03282                                                 | FRUP00000148603<br>FRUP00000160817                                                                                                                   |
| GPR50  | 9248; NP 004215                    | XP_346375     | NP_034470    | NP_990692                           | CAF99125                                                             | FRUP00000153084                                                                                                                                      |
| GPR61  | 83873; NP 114142                   | XP_227581     | NP_780679    | NW_060850                           | CAG06826<br>CAG07504                                                 |                                                                                                                                                      |
| GPR62  | 118442; NP 543141                  | XP_576464     | XP_488192    |                                     | CAG06806<br>CAG06960                                                 | FRUP00000149305                                                                                                                                      |
| GPR78  | 27201; NP 543009                   |               |              | XP_426354                           | GSTENT00035915001<br>CAG05074                                        | FRUP00000132645<br>FRUP00000158903                                                                                                                   |
| GPR84  | 53831; NP 065103                   | GeneID_367000 | NP_109645    |                                     | CAG06758                                                             | FRUP00000162610                                                                                                                                      |
| GPR101 | 83550; NP 473362                   | XP_229186     | XP_141764    |                                     | CAG09823<br>SCAF13862                                                | FRUP00000144472                                                                                                                                      |
| GPR135 | 64582; NP 072093                   | NP_861436     | NP_861417    | XP_426475                           | CAF98168                                                             | FRUP00000151143                                                                                                                                      |
| MTNR1A | 4543; NP 005949                    | XP_341442     | NP_032665    | NP_990693                           | CAF96594<br>CAG04524                                                 | FRUP00000158716<br>FRUP00000160445                                                                                                                   |
| MTNR1B | 4544; NP 005950                    | XP_345900     | NP_663758    | XP_417201                           | SCAF14601                                                            | FRUP00000141583                                                                                                                                      |
| OPN1LW | 5956; NP 064445                    |               | GeneID_20164 | NP 990771<br>NP 990740              | CAF96877                                                             | FRUP00000164823                                                                                                                                      |
| OPN1SW | 611; NP 001699                     | NP_112277     | NP_031564    |                                     | CAF96876                                                             | FRUP00000164822                                                                                                                                      |
| OPN3   | 23596; NP 055137                   |               | NP_034228    | XP 426139<br>XP 425584              | CAF89728<br>CAF97626<br>CAG08854<br>CAG09827                         | FRUP00000131360<br>FRUP00000140941<br>FRUP00000143705<br>FRUP00000155686                                                                             |
| OPN4   | 94233; NP 150598                   | NP_620215     | NP_038915    | XP 421494<br>NP 989956              | CAF90276<br>CAF96662<br>CAF99228<br>CAG08413                         | FRUP00000141781<br>FRUP00000141782<br>FRUP00000145811<br>FRUP00000145812<br>FRUP00000149714<br>FRUP00000163792                                       |
| OPN5   | 221391; NP 859528                  | NP_861437     | NP_861418    | XP 426228<br>XP 420056<br>XP 419178 | CAF91597<br>CAG00077<br>CAG03922<br>CAG09534<br>CAG11258<br>CAG13006 | FRUP00000133622<br>FRUP00000139290<br>FRUP00000145353<br>FRUP00000149081<br>FRUP00000154669<br>FRUP00000162507<br>FRUP00000164504<br>FRUP00000165286 |
| RE2    | 23432; NP 031395                   | XP_222837     | XP_136361    | XP_416594                           | CAG05829<br>CAG09451                                                 | FRUP00000138055<br>FRUP00000148240                                                                                                                   |
| RGR    | 5995; NP 002912                    | XP_224673     | NP_067315    | XP_421504                           | CAF98663<br>CAG13313                                                 | FRUP00000142438<br>FRUP00000148015                                                                                                                   |
| RHO    | 6010; NP 000530                    | NP_254276     | NP_663358    | XP 414454<br>NP 990821              | CAG06941<br>CAG11315<br>CAG11334                                     | FRUP00000136321<br>FRUP00000136323<br>FRUP00000156773<br>scaffold_200                                                                                |
| RRH    | 10692; NP 006574                   | XP_227718     | NP_033128    | XP_420649                           | CAF94915                                                             | FRUP00000130657                                                                                                                                      |

**Subtotal**

|           |           |           |           |           |           |           |
|-----------|-----------|-----------|-----------|-----------|-----------|-----------|
| <b>19</b> | <b>19</b> | <b>16</b> | <b>18</b> | <b>21</b> | <b>40</b> | <b>41</b> |
|-----------|-----------|-----------|-----------|-----------|-----------|-----------|

**Subclass A2**

|               |                                    |                        |                           |                           |                                              |                                                       |
|---------------|------------------------------------|------------------------|---------------------------|---------------------------|----------------------------------------------|-------------------------------------------------------|
| ADORA1/ADORA3 | 134; NP 000665<br>140; NP 000668   | NP 058851<br>NP 037028 | NP 001008533<br>NP 033761 | NP 989647<br>NP 989482    | CAF96797<br>CAG07486<br>CAG11815<br>CAG11816 | FRUP00000128561<br>FRUP00000143490<br>FRUP00000149785 |
| ADORA2A       | 135; NP 000666                     | NP 445746              | NP 033760                 | XP 425280                 | CAF93754<br>CAG02468                         | FRUP00000141222<br>FRUP00000142941<br>FRUP00000144716 |
| ADORA2B       | 136; NP 000667                     | NP 058857              | NP 031439                 | NP 990418                 | CAF98510<br>CAG09178                         | FRUP00000154463                                       |
| ADRA1B/GPR88  | 147; NP 000670<br>54112; NP 071332 | NP 058687<br>NP 113884 | NP 031442<br>NP 071872    | XP 414483<br>XP 001232659 | CAF92745<br>CAF97256                         | FRUP00000152462<br>FRUP00000164690                    |
| ADRA1A        | 148; NP 000671                     | NP 058887              | NP 038489                 | XP 425762                 | CAG11192                                     | FRUP00000141240                                       |

| MRCA        | Human gene ID;<br>accession number   | Rat                    | Mouse                  | Chicken                                          | <i>T. nigroviridis</i>                       | <i>T. rubripes</i>                                                    |
|-------------|--------------------------------------|------------------------|------------------------|--------------------------------------------------|----------------------------------------------|-----------------------------------------------------------------------|
| ADRA2A      | 150: NP 000672                       | NP 036871              | NP 031443              | XP 426537                                        | CAG01293<br>CAG05052<br>CAG05356             | FRUP00000127209<br>FRUP00000145339<br>FRUP00000154128                 |
| ADRA2B      | 151: NP 000673                       | NP 612514              | NP 033763              |                                                  | CAG07800                                     | FRUP00000129228                                                       |
| ADRA2C      | 152: NP 000674                       | NP 612515              | NP 031444              | XP 426355<br>XP 425203                           | CAG00720<br>CAG03287                         | FRUP00000136842<br>FRUP00000158905                                    |
| ADRA1D      | 146: NP 000669                       | NP 077809              | NP 038488              | XP 420871                                        | CAF91280                                     | FRUP00000140656                                                       |
| ADRB1/ADRB3 | 153: NP 000675<br>155: NP 000016     | NP 036833<br>NP 037240 | NP 031445<br>NP 038490 | XP 426540<br>XP 428541                           | CAG08867<br>CAG12607                         | FRUP00000128218<br>FRUP00000147601                                    |
| ADRB2       | 154: NP 000015                       | NP 036624              | NP 031446              | XP 425195                                        | CAG10129                                     | FRUP00000128843<br>FRUP00000157526                                    |
| CHRM1       | 1128: NP 000729                      | NP 542951              | NP 031724              |                                                  | CAG10670                                     | FRUP00000131048                                                       |
| CHRM2       | 1129: NP 000730                      | NP 112278              | NP 987076              | XP 416359                                        | CAG02408<br>CAG03403                         | FRUP00000127975<br>FRUP00000129486                                    |
| CHRM3       | 1131: NP 000731                      | NP 036659              | NP 150372              | NP 990730                                        | CAF92462<br>CAG10073                         | FRUP00000160548<br>scaffold 143                                       |
| CHRM4       | 1132: NP 000732                      | XP 345404              | NP 031725              | XP 421119                                        | CAG05625<br>CAG06610                         | FRUP00000147533<br>FRUP00000155473                                    |
| CHRM5       | 1133: NP 036257                      | NP 059058              | NP 991352              | XP 426437                                        | CAG03529                                     | FRUP00000130167                                                       |
| DRD1        | 1812: NP 000785                      | NP 037269              | NP 031610              | XP 425206                                        | CAF93510<br>CAF95884<br>CAG11724             | FRUP00000154522<br>FRUP00000164051<br>FRUP00000164859                 |
| DRD2        | 1813: NP 000786                      | NP 036679              | NP 034207              | XP 425811                                        | CAF92229<br>CAF97490<br>CAG13001             | FRUP00000129665<br>FRUP00000143523<br>FRUP00000153968                 |
| DRD3        | 1814: NP 387512                      | NP 058836              | NP 031903              | XP 416570                                        | CAG04235                                     | scaffold 146                                                          |
| DRD4        | 1815: NP 000788                      | NP 037076              | NP 031904              | XP 420947                                        | CAF95731<br>CAF98376                         | FRUP00000142755<br>FRUP00000149812                                    |
| DRD5        | 1816: NP 000789                      | NP 036900              | NP 038531              | XP 426518<br>XP 426351                           | CAF90994<br>CAG02007                         | FRUP00000131890<br>FRUP00000138676                                    |
| GPR21       | 2844: NP 005285                      | XP 231251              | NP 796357              | XP 415391                                        | CAF93159<br>CAG09652                         | FRUP00000163990                                                       |
| GPR22       | 2845: NP 005286                      | XP 234041              | NP 780400              | XP 001231969                                     | CAF89181<br>CAF96769<br>CAG02014<br>CAG08711 | FRUP00000133859<br>FRUP00000162183<br>FRUP00000163060<br>scaffold 374 |
| GPR52       | 9293: NP 005675                      | NW 047398              | XP 890263              | NP 001012941                                     | CAG00742                                     | FRUP00000163527                                                       |
| GPR58       | 9287: NP 055441                      | NP 001008512           | NP 001007267           | XP 427716                                        | CAF94065                                     | FRUP00000131967                                                       |
| GPR75       | 10936: NP 006785                     | XP 573685              | NP 780699              | XP 426099                                        | SCAF15006                                    | scaffold 905                                                          |
| GPR119      | 139760: NP 848566                    | NP 861435              | NP 861416              | XP 426720<br>XP 426248                           | CAF97243                                     | FRUP00000143792                                                       |
| HRH1        | 3269: NP 000852                      | NP 058714              | NP 032311              | XP 425153                                        | CAG07054                                     | FRUP00000164084                                                       |
| HRH2        | 3274: NP 071640                      | NP 037097              | NP 001010973           | XP 425208                                        | CAG01551<br>CAG04750                         | FRUP00000131597<br>FRUP00000138905                                    |
| HRH4/HRH3   | 59340: NP 067637<br>11255: NP 009163 | NP 571984<br>NP 445958 | NP 694727<br>NP 598610 | XP 426079<br>XP 414481<br>XP 425705<br>XP 425117 | CAG07613<br>CAG10949                         | FRUP00000146131<br>FRUP00000165198                                    |
| HTR1A       | 3350: NP 000515                      | NP 036717              | NP 032334              | XP 429136                                        | CAF91711<br>CAF93441                         | FRUP00000136865<br>FRUP00000154633                                    |
| HTR1B       | 3351: NP 000854                      | NP 071561              | NP 034612              | XP 419875                                        | CAF89927                                     | FRUP00000161510                                                       |
| HTR1D       | 3352: NP 000855                      | NP 036984              | NP 032335              | XP 001232312                                     | CAG10464                                     | FRUP00000127520                                                       |
| HTR1F/HTR1E | 3354: NP 000856<br>3355: NP 000857   | NP 068629              | NP 032336              | XP 425535<br>XP 001235179                        | CAG09227                                     | FRUP00000155421                                                       |
| HTR2B       | 3357: NP 000858                      | NP 058946              | NP 032337              | AAF20211                                         | CAC85912<br>CAC86247                         | FRUP00000147089                                                       |

| MRCA              | Human gene ID;<br>accession number                      | Rat                                                    | Mouse                                                                        | Chicken                | <i>T. nigroviridis</i>                                                                                                                                   | <i>T. rubripes</i>                                                                                                              |
|-------------------|---------------------------------------------------------|--------------------------------------------------------|------------------------------------------------------------------------------|------------------------|----------------------------------------------------------------------------------------------------------------------------------------------------------|---------------------------------------------------------------------------------------------------------------------------------|
| HTR2C/HTR2A       | 3356: NP 000612<br>3358: NP 000859                      | NP 058950<br>NP 036897                                 | NP 766400<br>NP 032338                                                       | XP 425628<br>XP 426265 | CAG12257                                                                                                                                                 | FRUP00000135888                                                                                                                 |
| HTR4/GPR160       | 26996: NP 055188<br>3360: NP 000861                     | NP 001020318<br>NP 036985                              | XP 130823<br>NP 032339                                                       | XP 422799              | CAF93600<br>CAF95370<br>CAG04907                                                                                                                         | FRUP00000138443<br>FRUP00000140658<br>FRUP00000164424                                                                           |
| HTR5A/HTR5B       | 3361: NP 076917                                         | XP 341112<br>NP 037280                                 | NP 034613<br>NP 032340                                                       | XP 426604<br>XP 425970 | CAG04298                                                                                                                                                 | scaffold 934                                                                                                                    |
| HTR6              | 3362: NP 000862                                         | NP 077341                                              | NP 067333                                                                    | XP 427576              | CAG01704                                                                                                                                                 | FRUP00000139170<br>FRUP00000139171                                                                                              |
| HTR7              | 3363: NP 062873                                         | NP 075227                                              | NP 032341                                                                    | XP 421666<br>XP 420880 | CAG05134<br>CAG09680                                                                                                                                     | FRUP00000139991<br>FRUP00000144402<br>FRUP00000144993                                                                           |
| TRAR1/GPR57a/PNRe | 9288: NC 000006<br>9038: NP 003958<br>134864: NP 612200 | NP 001009532<br>NP 001009650<br>NP 599155<br>NP 783173 | NP 001008429<br>NP 001009574<br>NP 038736<br>NP 444435                       | XP 419740              | CAF91012<br>CAF92549<br>CAF92550<br>CAF92551<br>CAF93538<br>CAF93617<br>CAF93618<br>CAF94841<br>CAF95185<br>CAF95186<br>CAF95187<br>CAF96106<br>CAG13003 | FRUP00000131749<br>FRUP00000138381<br>FRUP00000150777<br>FRUP00000150779<br>FRUP00000154655<br>FRUP00000157293<br>scaffold 2245 |
| TRAR4/TRAR5       | 319100: NP 778237<br>83551: NP 444508                   | NP 783174<br>NP 783189<br>NP 783191<br>NP 783190       | NP 001010828<br>NP 001008499<br>NP 001010830<br>NP 001010840<br>NP_001010837 |                        |                                                                                                                                                          | FRUP00000157578<br>FRUP00000135638                                                                                              |

**Subtotal**

|           |           |           |           |           |           |           |
|-----------|-----------|-----------|-----------|-----------|-----------|-----------|
| <b>42</b> | <b>52</b> | <b>55</b> | <b>56</b> | <b>52</b> | <b>83</b> | <b>79</b> |
|-----------|-----------|-----------|-----------|-----------|-----------|-----------|

**Subclass A3**

|              |                                    |                           |                           |                        |                                              |                                                                          |
|--------------|------------------------------------|---------------------------|---------------------------|------------------------|----------------------------------------------|--------------------------------------------------------------------------|
| CNR1         | 1268: NP 149421                    | NP_036916                 | NP_031752                 | XP_426191              | CAG09211<br>CAG10478                         | FRUP00000157187<br>scaffold 1709                                         |
| CNR2         | 1269: NP 001832                    | NP_065418                 | NP_034054                 | XP_425791              | CAF91752                                     | FRUP00000161224                                                          |
| EDG1         | 1901: NP 001391                    | NP_058997                 | NP_031927                 | XP_422305              | CAF90490                                     | scaffold 6096                                                            |
| EDG2         | 1902: NP 476500                    | NP_446388                 | NP_034466                 | XP_424918              | CAF89669<br>CAF90900<br>CAF92197             | FRUP00000154449<br>scaffold 86                                           |
| EDG3/EDG6    | 1903: NP 005217<br>8698: NP 003766 | XP 225216<br>XP 234930    | NP 034231<br>NP 034232    | XP 428818<br>XP 428050 | CAG07943<br>CAG12442                         | FRUP00000154122<br>scaffold 270<br>scaffold 270<br>scaffold 203          |
| EDG4         | 9170: NP 004711                    | XP_573887                 | NP_064412                 | XP_423763              |                                              | scaffold 799                                                             |
| EDG5         | 9294: NP 004221                    | NP_058888                 | NP_034463                 |                        | SCAF15050<br>chr3_11567980_8876              | scaffold 180                                                             |
| EDG7         | 23566: NP 036284                   | NP_076459                 | NP_075359                 | XP_422368              | CAG08072                                     | FRUP00000148649                                                          |
| EDG8         | 53637: NP 110387                   | NP_068543                 | NP_444420                 |                        | CAF92590                                     | FRUP00000139298                                                          |
| GPR6         | 2830: NP 005275                    | NP_113994                 | NP_951013                 | XP_426182              | CAG03572                                     | FRUP00000134973                                                          |
| GPR12/GPR3   | 2835: NP 005279<br>2827: NP 005272 | NP 110458<br>NP 714949    | NP 001010941<br>NP 032180 | XP_425637              | CAG04221<br>CAG12255<br>CAF88618             | FRUP00000158473<br>FRUP00000160201                                       |
| MC1R         | 4157: NP 002377                    | EDL92809                  | NP_032585                 | XP_425135              | AAQ55176                                     | AAO65548                                                                 |
| MC2R         | 4158: NP 000520                    | XP_574167                 | NP_032586                 | XP_426070              | CAF95601                                     |                                                                          |
| MC4R         | 4160: NP 005903                    | NP_037231                 | NP_058673                 | XP_426042              | AAQ55178                                     | AAO65551                                                                 |
| MC5R/MC3R    | 4161: NP 005904<br>4159: NP 063941 | NP 037314<br>NP 001020441 | NP 038624<br>NP 032587    | NP 001026186           | AAQ55179                                     | AAO65553                                                                 |
| PTGER2/PTGDR | 5729: NP 000944<br>5732: NP 000947 | NP 071577<br>NP 112350    | NP 032988<br>NP 032990    | XP_426485              | CAG00989                                     | scaffold 1339                                                            |
| PTGER3       | 5733: NP 942008                    | NP_036836                 | NP_035326                 | XP_426672              | CAG01184                                     | FRUP00000131256                                                          |
| PTGER4       | 5734: NP 000949                    | NP_114465                 | NP_032991                 | XP_424770              | CAF95032<br>CAF96390<br>CAF97110<br>CAG09586 | FRUP00000155267<br>FRUP00000157769<br>FRUP00000161139<br>FRUP00000162687 |

| MRCA         | Human gene ID;<br>accession number | Rat                    | Mouse                  | Chicken      | <i>T. nigroviridis</i> | <i>T. rubripes</i>                 |
|--------------|------------------------------------|------------------------|------------------------|--------------|------------------------|------------------------------------|
| PTGFR/PTGER1 | 5731: NP 000946<br>5737: NP 000950 | NP_037232<br>NP_037247 | NP_038669<br>NP_032992 | NP_001038122 | CAG03303               | FRUP00000149163<br>FRUP00000151130 |
| PTGIR        | 5739: NP 000951                    | XP_218457              | NP_032993              |              | SCAF14537              | FRUP00000130879                    |
| TBXA2R       | 6915: NP 001051                    | NP_058750              | NP_033351              |              | CAG00626               | FRUP00000152568                    |

**Subtotal**

|           |           |           |           |           |           |           |
|-----------|-----------|-----------|-----------|-----------|-----------|-----------|
| <b>21</b> | <b>26</b> | <b>26</b> | <b>26</b> | <b>18</b> | <b>30</b> | <b>30</b> |
|-----------|-----------|-----------|-----------|-----------|-----------|-----------|

**Subclass A4**

|                         |                                                                           |                                                    |                                                     |                                                  |                                  |                                                                          |
|-------------------------|---------------------------------------------------------------------------|----------------------------------------------------|-----------------------------------------------------|--------------------------------------------------|----------------------------------|--------------------------------------------------------------------------|
| ADMR                    | 11318: NP 009195                                                          | NP_445754                                          | NP_031438                                           |                                                  | CAF90054                         | FRUP00000146637                                                          |
| CYSLTR1/CYSLTR2         | 10800: NP 006630<br>57105: NP 065110                                      | NP_446093<br>NP_596904                             | NP_067451<br>NP_598481                              | XP_426249<br>XP_425629                           | SCAF7335                         | FRUP00000150747                                                          |
| EBI2                    | 1880: NP 004942                                                           |                                                    | NP_898852                                           | XP_428804                                        | CAG07299<br>chr2 7825313-77092   | FRUP00000150142<br>FRUP00000161432                                       |
| F2R                     | 2149: NP 001983                                                           | NP_037082                                          | NP_034299                                           | XP_424799                                        | CAG07882                         | FRUP00000152221                                                          |
| F2RL1                   | 2150: NP 005233                                                           | NP_446349                                          | NP_032000                                           | NP_001012626                                     | CAG05264<br>CAG05265             | FRUP00000130845<br>FRUP00000130847                                       |
| F2RL2                   | 2151: NP 004092                                                           | NP_445765                                          | NP_034300                                           | XP_414523                                        | CAG05266<br>CAG07880             | FRUP00000151261<br>FRUP00000129585<br>FRUP00000130849                    |
| F2RL3                   | 9002: NP 003941                                                           | NP_446260                                          | NP_032001                                           | XP_418256                                        | CAF95426                         | chrUn_311834154-530                                                      |
| GPR4/GPR132             | 29933: NP 037477<br>2828: NP 005273                                       | XP_234574<br>NP_001020851                          | NP_064309<br>NP_783599                              | XP_426469                                        | CAF97465<br>CAG12733             | FRUP00000128368<br>FRUP00000135821                                       |
| GPR17                   | 2840: NP 005282                                                           | NW_047510                                          | AAH70439                                            |                                                  | CAG04290<br>CAG05650             | FRUP00000128875<br>FRUP00000147658                                       |
| GPR18                   | 2841: NP 005283                                                           |                                                    | NP_877958                                           | NW_060236                                        | CAG07300                         | FRUP00000150143                                                          |
| GPR20                   | 2843: NP 005284                                                           | NP_071552                                          | NP_775541                                           | XP_425941                                        | CAF99361<br>CAG11945             | FRUP00000136628<br>FRUP00000165047                                       |
| GPR23/GPR35/GPR55/GPR92 | 2846: NP 005287<br>2859: NP 005292<br>9290: NP 005674<br>57121: NP 065133 | XP_228501<br>NP_001032436<br>AAD22411<br>XP_575667 | NP_780480<br>NP_071715<br>NP_001028462<br>XP_355812 | XP_425741<br>XP_420150<br>XP_422645<br>XP_416504 | CAF90112<br>CAG03809             | FRUP00000150750                                                          |
| GPR34                   | 2857: NP 005291                                                           | NP_001020096                                       | NP_035953                                           | XP_420190                                        | SCAF14978                        | scaffold_1642                                                            |
| GPR41/GPR42a            | 2865: NP 005295<br>2866: NP 005296                                        | XP_344881                                          | XP_145470                                           |                                                  | CAF89689                         | FRUP00000153029                                                          |
| GPR43/GPR40             | 2864: NP 005294<br>2867: NP 005297                                        | NP_695216<br>NP_001005877                          | NP_918946<br>NP_666299                              | XP_428780<br>XP_426943                           | CAF93280<br>CAG03362             | FRUP00000129763<br>FRUP00000161234                                       |
| GPR65                   | 8477: NP 003599                                                           | XP_234367                                          | NP_032178                                           | XP_421305                                        | SCAF15019                        | FRUP00000150188                                                          |
| GPR68                   | 8111: NP 003476                                                           | XP_234483                                          | NP_780702                                           | XP_426459                                        | CAF99011                         | FRUP00000136318                                                          |
| GPR80                   | 27199: NP 543008                                                          | NP_997471                                          | NP_001001490                                        | XP_425595<br>XP_425594                           | CAG04953                         | FRUP00000159316                                                          |
| GPR86                   | 53829: NP 076403                                                          | NP_001002853                                       | NP_083084                                           |                                                  | CAF97388                         | scaffold_239                                                             |
| GPR91                   | 56670: NP 149039                                                          | XP_579061                                          | NP_115776                                           | XP_422836                                        | CAF97381                         | FRUP00000138067                                                          |
| GPR105                  | 9934: NP 005694                                                           | NP_598261                                          | NP_573463                                           | XP_422841                                        | SCAF14677                        |                                                                          |
| GPR109A/GPR31/GPR81     | 338442: NP 808219<br>2853: NP 005290<br>27198: NP 115943                  | NP_852141<br>XP_217867<br>XP_001072594             | NP_109626<br>GeneID 107431<br>NP_780729             |                                                  | CAF90987<br>CAG05298<br>CAG08446 | FRUP00000136429<br>FRUP00000146889<br>FRUP00000148806<br>FRUP00000150723 |
| GPR141                  | 353345: NP 861456                                                         | NP_861432                                          | NP_861419                                           | XP_418832                                        | SCAF14544                        | scaffold_240                                                             |
| GPR174/P2RY10           | 84636: NP 115942<br>27334: NP 938147                                      | XP_228495<br>XP_228500                             | NP_001028423<br>NP_766023                           | NP_001008464<br>XP_420149<br>XP_420148           | CAG14148                         | scaffold_1393                                                            |
| P2RY1                   | 5028: NP 002554                                                           | NP_036932                                          | NP_032798                                           | XP_427676<br>NP_990664                           | CAF97378<br>CAG03842             | FRUP00000138058                                                          |
| P2RY2                   | 5029: NP 788085                                                           | NP_058951                                          | NP_032799                                           | XP_425667                                        | CAG00917<br>CAF97358             | FRUP00000127686<br>FRUP00000141264<br>FRUP00000165330                    |
| P2RY4                   | 5030: NP 002556                                                           | NP_113868                                          | NP_065646                                           | XP_420157                                        | CAG09809                         | FRUP00000163721                                                          |
| P2Y5                    | 10161: NP 005758                                                          | NW_047454                                          | NP_780325                                           | NP_990530                                        | CAG02919<br>CAG12785             | FRUP00000141960                                                          |
| P2RY6                   | 5031: NP 004145                                                           | NP_476465                                          | NP_898991                                           | NP_990526                                        | CAG00913                         | FRUP00000151445                                                          |

| MRCA                | Human gene ID;<br>accession number                       | Rat                    | Mouse                               | Chicken                             | <i>T. nigroviridis</i> | <i>T. rubripes</i> |
|---------------------|----------------------------------------------------------|------------------------|-------------------------------------|-------------------------------------|------------------------|--------------------|
| P2RY8               | 286530; NP 835230                                        |                        |                                     | NP_001008679                        |                        | FRUP00000139369    |
| P2RY11              | 5032; NP 002557                                          |                        |                                     |                                     | CAG12186               | FRUP00000147765    |
| P2RY12/GPR171/GPR87 | 29909; NP 037440<br>53836; NP 076404<br>64805; NP 795345 | XP 227177<br>NP 073637 | NP 775574<br>NP 115775<br>NP 081847 | XP 422842<br>XP 422840<br>XP 422839 | CAF97387               | FRUP00000138083    |
| PTAFR               | 5724; NP 000943                                          | NP_445773              | XP_357441                           | XP_425768                           | CAG10424               | FRUP00000134471    |
| RDC1                | 57007; NP 064707                                         | NP_445804              | NP_031748                           | XP_426554                           | CAG05877               | scaffold_387       |

**Subtotal**

|           |           |           |           |           |           |           |
|-----------|-----------|-----------|-----------|-----------|-----------|-----------|
| <b>34</b> | <b>46</b> | <b>40</b> | <b>43</b> | <b>39</b> | <b>46</b> | <b>46</b> |
|-----------|-----------|-----------|-----------|-----------|-----------|-----------|

**Subclass A5**

|               |                                       |                        |                        |                           |                                                          |                                                                                             |
|---------------|---------------------------------------|------------------------|------------------------|---------------------------|----------------------------------------------------------|---------------------------------------------------------------------------------------------|
| AVPR1A        | 552; NP 000697                        | NP_444178              | NP_058543              | XP_425436                 | CAF96006<br>CAG12390                                     | FRUP00000141525<br>FRUP00000161762                                                          |
| AVPR1B        | 553; NP 000698                        | NP_058901              | NP_036054              | XP 425822<br>XP 425434    | CAF96931                                                 | scaffold_8423                                                                               |
| AVPR2         | 554; NP 000045                        | NP_062009              | NP_062277              |                           | CAG03798<br>CAG07446                                     | FRUP00000161883<br>scaffold_323                                                             |
| CCKAR/CCKBR   | 886; NP 000721<br>887; NP 795344      | NP 036820<br>NP 037297 | NP 033957<br>NP 031653 | XP 420751<br>NP 001001742 | CAG04576                                                 | FRUP00000133099                                                                             |
| EDNRA         | 1909; NP 001948                       | NP_036682              | NP_034462              | NP_989450                 | CAG02202<br>CAG11066                                     | FRUP00000133802<br>FRUP00000133804<br>FRUP00000133807<br>FRUP00000157593<br>FRUP00000157598 |
| EDNRB         | 1910; NP 003982                       | NP_059029              | NP_031930              | XP 417001<br>NP 989451    | CAF90114<br>CAF97649<br>CAG05905                         | FRUP00000141004<br>FRUP00000141006<br>FRUP00000150746<br>FRUP00000163212                    |
| FSHR          | 2492; NP 000136                       | NP_954707              | NP_038551              | NP_990410                 | CAF91019                                                 | scaffold_49                                                                                 |
| GNRHR2        | 114814; NP 476504                     |                        |                        | NP_001012627              | CAF92557<br>CAF93245<br>CAG00826<br>CAG03087<br>CAG13098 | FRUP00000134302<br>FRUP00000138360<br>FRUP00000141711<br>FRUP00000156324<br>FRUP00000160897 |
| GPR           | 11245; NP 009154                      | XP_342494              | NP_958755              | XP_426435                 | CAG03525                                                 | FRUP00000131045                                                                             |
| GPR10         | 2834; NP_004239                       | NP_631932              | NP_963909              | XP_428805                 | CAF97466                                                 | FRUP00000135820                                                                             |
| GPR19         | 2842; NP 006134                       | NP_542146              | NP_032183              | XP_428465                 | CAF90680                                                 | FRUP00000131864                                                                             |
| GPR37         | 2861; NP 005293                       | NP_476549              | NP_034468              | XP_415992                 | CAG01068                                                 | FRUP00000137022<br>FRUP00000140117<br>scaffold_2384<br>scaffold_3299                        |
| GPR37L        | 9283; NP 004758                       | XP_573457              | NP_602320              | XP_419256                 | SCAF7416                                                 | FRUP00000136126<br>FRUP00000142342                                                          |
| GPR45         | 11250; NP 009158                      | XP_237112              | NP_444337              |                           | CAG05802                                                 | FRUP00000163802                                                                             |
| GPR63         | 81491; NP 110411                      | XP_232847              | NP_109658              | XP_426189                 | CAF93484                                                 | FRUP00000149653                                                                             |
| GPR73/GPR73L1 | 10887; NP 620414<br>128674; NP 658986 | NP 620433<br>NP 620434 | NP 067356<br>NP 659193 | XP 419333<br>XP 419334    | CAF98618                                                 | FRUP00000139538<br>FRUP00000154172                                                          |
| GPR74         | 10886; NP 444264                      | NP_076470              | NP_573455              | XP_426315                 | CAF97104<br>CAG07773                                     | FRUP00000155275<br>FRUP00000155634                                                          |
| GPR83         | 10888; NP 057624                      | NP 536336              | NP 034417              | XP 426254<br>XP 426651    | CAG06215                                                 | FRUP00000164362                                                                             |
| GPR85         | 54329; NP 061843                      | NP_071590              | NP_659503              | XP_416019                 | CAG12125                                                 | FRUP00000143116                                                                             |
| GPR103        | 84109; NP 937822                      | NP_937842              | NP_780733              | XP_420626                 | CAG04805<br>SCAF14750                                    | FRUP00000142516                                                                             |
| GPR173/GPR27  | 54328; NP 061842<br>2850; NP 061844   | NP 071591<br>NP 075587 | NP 081819<br>NP 032184 | XP_414427                 | CAF93024<br>CAF96921<br>CAG03946                         | FRUP00000150812<br>FRUP00000153190<br>FRUP00000155856                                       |
| GRPR/BRS3     | 680; NP 001718<br>2925; NP 005305     | NP 690058<br>NP 036838 | NP 033896<br>NP 032203 | NP 989737<br>NP 989738    | CAF99824<br>CAG05835                                     | FRUP00000156510<br>FRUP00000161978                                                          |
| HCRT2/HCRT1   | 3061; NP 001516<br>3062; NP 001517    | NP 037196<br>NP 037206 | NP 945197<br>NP 945200 | NP 001019755              | CAG09420                                                 | FRUP00000163192                                                                             |
| LGR4          | 55366; NP 060960                      | NP_775450              | XP_355385              | XP_426162                 | CAF99699                                                 | scaffold_826                                                                                |
| LGR5          | 8549; NP 003658                       | XP_235149              | NP_034325              | XP_425441                 | CAG14806                                                 | FRUP00000149831                                                                             |

| MRCA              | Human gene ID;<br>accession number                    | Rat                                    | Mouse                               | Chicken                   | <i>T. nigroviridis</i>           | <i>T. rubripes</i>                                    |
|-------------------|-------------------------------------------------------|----------------------------------------|-------------------------------------|---------------------------|----------------------------------|-------------------------------------------------------|
| LGR6              | 59352; NP 067649                                      | XP_573455                              | XP_283647                           | XP_419253                 | CAG07358                         | FRUP00000148236<br>FRUP00000148237                    |
| LGR7              | 59350; NP 067647                                      | NP_958820                              | NP_997617                           | XP_426253                 | CAG04641                         | scaffold_1619                                         |
| LGR8              | 122042; NP 570718                                     | XP_344074                              | NP_569720                           |                           | CAG00416                         | FRUP00000159568                                       |
| LHCGR             | 3973; NP 000224                                       | NP_037110                              | NP_038610                           | NP_990267                 | CAF91017<br>CAG09466             |                                                       |
| NMBR              | 4829; NP 002502                                       | NP_036931                              | NP_032729                           | XP_426167                 | CAF94959<br>CAG14163             | FRUP00000150118<br>GSTENT00011415001 pr               |
| NPF1R1            | 64106; NP 071429                                      | NP_071627                              | XP_137119                           | NP_989693                 | CAG09719                         | FRUP00000157824                                       |
| NPY2R             | 4887; NP 000901                                       | NP_076458                              | NP_032757                           | XP 420373<br>XP 414599    | CAF96589<br>SCAF14573            | FRUP00000138240<br>DAA05226                           |
| NPY5R/NPY1R/NPY6R | 4886; NP 000900<br>4889; NP 006165<br>4888; NC 000005 | NP 001013050<br>NP 037001<br>NP 037003 | NP 035064<br>NP 057917<br>NP 035065 | XP 426285<br>XP 420388    | CAG02528<br>CAG05410             | FRUP00000160782<br>FRUP00000160783                    |
| OXTR              | 5021; NP 000907                                       |                                        | XP_144956                           | XP_426768                 | CAG06809<br>CAG06958             | FRUP00000127611<br>FRUP00000149294                    |
| PPYR1             | 5540; NP 005963                                       | NP_113769                              | NP_032945                           | XP_426511                 | CAG09405                         | FRUP00000164394                                       |
| TACR1             | 6869; NP 056542                                       | NP_036799                              | NP_033339                           | NP_990199                 | CAG05392<br>CAG12579             | FRUP00000138587<br>FRUP00000148382<br>FRUP00000160726 |
| TACR3/TACR2       | 6865; NP 001048<br>6870; NP 001050                    | NP 542946<br>NP 058749                 | NP 033340<br>NP 067357              | XP 426496<br>XP 001232174 | CAG01274<br>CAG05682<br>CAG11520 | FRUP00000132595<br>FRUP00000135143<br>FRUP00000147917 |
| TSHR              | 7253; NP 000360                                       | NP_037020                              | NP_035778                           | XP_426455                 | CAG00111                         | FRUP00000145651                                       |
| <b>Subtotal</b>   |                                                       |                                        |                                     |                           |                                  |                                                       |
| <b>38</b>         | <b>46</b>                                             | <b>44</b>                              | <b>45</b>                           | <b>46</b>                 | <b>61</b>                        | <b>69</b>                                             |

#### Subclass A6

|                 |                                     |                        |                        |                        |                                  |                                                       |
|-----------------|-------------------------------------|------------------------|------------------------|------------------------|----------------------------------|-------------------------------------------------------|
| GHSR            | 2693; NP 004113                     | NP_114464              | NP_796304              | NP_989725              | CAF95899                         | FRUP00000131849                                       |
| GPR38           | 2862; NP 001498                     |                        |                        | XP_425630              | CAG12790                         | FRUP00000138615                                       |
| GPR39           | 2863; NP 001499                     | DAA06056               | AAH85285               | XP_422128              | CAG11238                         | FRUP00000135301                                       |
| NMUR1           | 10316; NP 006047                    | NP_075588              | NP_034471              | XP_426705              | CAF97543<br>CAG03466             | FRUP00000153653<br>FRUP00000156953                    |
| NMUR2           | 56923; NP 064552                    | NP_071611              | NP_694719              | XP_425209              | CAG03508                         | FRUP00000147487                                       |
| NTSR1/NTSR2     | 4923; NP 002522<br>23620; NP 036476 | XP 345485<br>NP 073186 | NP 061236<br>NP 032773 | XP_425707              | CAF89857                         | FRUP00000128303                                       |
| TRHR            | 7201; NP 003292                     | NP 037179<br>NP 852029 | NP 038724<br>NP 573465 | XP 425702<br>NP 990261 | CAF92799<br>CAF96270<br>CAG03888 | FRUP00000134073<br>FRUP00000146669<br>FRUP00000153993 |
| <b>Subtotal</b> |                                     |                        |                        |                        |                                  |                                                       |
| <b>7</b>        | <b>8</b>                            | <b>8</b>               | <b>8</b>               | <b>8</b>               | <b>10</b>                        | <b>10</b>                                             |

#### Subclass A7

|                          |                                                                                             |                                                                            |                                                                            |                                     |                                            |                                                                          |
|--------------------------|---------------------------------------------------------------------------------------------|----------------------------------------------------------------------------|----------------------------------------------------------------------------|-------------------------------------|--------------------------------------------|--------------------------------------------------------------------------|
| AGTR1                    | 185; NP 114438                                                                              | NP_112271                                                                  | NP 796296<br>NP 780295                                                     | NP_990488                           | CAG04270                                   | FRUP00000150672                                                          |
| AGTR2                    | 186; NP 000677                                                                              | NP_036626                                                                  | NP_031455                                                                  | XP_426266                           | CAG08373                                   | scaffold 1395                                                            |
| AGTRL1                   | 187; NP 005152                                                                              | NP_112639                                                                  | NP_035914                                                                  | XP_425289                           | CAF90289<br>CAF99292<br>SCAF12244          | FRUP00000134029<br>FRUP00000134030<br>FRUP00000146396<br>FRUP00000165603 |
| BDKRB1                   | 623; NP_000701                                                                              | NP_110478                                                                  | NP_031565                                                                  | NP_001074189                        | CAG10408                                   | FRUP00000150183<br>FRUP00000150187                                       |
| BLR1                     | 643; NP_116743                                                                              | NP_445755                                                                  | NP_031577                                                                  | NP_001026083                        | CAG09055                                   | FRUP00000156705                                                          |
| CXCR3                    | 2833; NP 001495                                                                             | NP_445867                                                                  | NP_034040                                                                  |                                     | CAF98051<br>CAF98053<br>chr8_854312-855332 | FRUP00000138635<br>FRUP00000138636<br>chrUn:212102004-3119               |
| CX3CR1                   | 1524; NP_001328                                                                             | NP_598218                                                                  | NP_034117                                                                  | XP_418820                           | chr8_3994467_940                           | chrUn_197062813_3289                                                     |
| CCR1/CCR2/CCR3/CCR4/CCR5 | 1230; NP 001286<br>1231; NP 000639<br>1232; NP 847899<br>1233; NP 005499<br>1234; NP 000570 | NP 065417<br>XP 236742<br>NP 068638<br>NP 446410<br>NP 598216<br>NP 446412 | NP 034042<br>NP 034045<br>NP 034044<br>NP 034046<br>NP 034047<br>NP 031744 | XP_426017<br>XP_418796<br>XP_418795 | chr8_3997729_3998596                       | FRUP00000127130                                                          |

| MRCAs                          | Human gene ID;<br>accession number                                                            | Rat                                                                                 | Mouse                                                                                            | Chicken                                          | <i>T. nigroviridis</i>                                   | <i>T. rubripes</i>                                    |
|--------------------------------|-----------------------------------------------------------------------------------------------|-------------------------------------------------------------------------------------|--------------------------------------------------------------------------------------------------|--------------------------------------------------|----------------------------------------------------------|-------------------------------------------------------|
| CCR6                           | 1235: NP_004358                                                                               | NP_001013163                                                                        | NP_033965                                                                                        | XP_419608                                        | CAF92962                                                 | FRUP00000146532                                       |
| CCR7                           | 1236: NP_001829                                                                               | NP_955783                                                                           | NP_031745                                                                                        | XP_425875                                        | CAG06152                                                 | FRUP00000154746                                       |
| CCR9                           | 10803: NP_006632                                                                              | NP_758832                                                                           | NP_034043                                                                                        | XP_426014                                        | CAF90274<br>CAG05508                                     | FRUP00000142615                                       |
| CMKLR1/GPR33                   | 1240: NP_004063<br>2856: NC_000014                                                            | NP_071554<br>NP_001026993                                                           | NP_032179<br>NP_032185                                                                           | XP_425239<br>XP_423260                           | CAF94854<br>CAF94856<br>CAG08499                         | FRUP00000145765<br>FRUP00000149103<br>FRUP00000155117 |
| CCR10                          | 2826: NP_057686                                                                               | XP_343969                                                                           | NP_031747                                                                                        |                                                  | chr2_1817756-1818529                                     | FRUP00000140298                                       |
| CCR11                          | 51554: NP_848540                                                                              | Q9ESK1                                                                              | NP_663746                                                                                        |                                                  | CAF88488                                                 | FRUP00000138457                                       |
| C5R1/C3AR1/GPR77               | 719: NP_004045<br>728: NP_001727<br>27202: NP_060955                                          | NP_114449<br>NP_446071<br>NP_001003710                                              | NP_033909<br>NP_031603<br>NP_795886                                                              | XP_416428<br>XP_428039                           | CAG02859                                                 | FRUP00000134135                                       |
| CXCR4                          | 7852: NP_003458                                                                               | NP_071541                                                                           | NP_034041                                                                                        | NP_989948                                        | CAF97662<br>CAG01848                                     | FRUP00000134232<br>FRUP00000137823                    |
| FPRL1/FPRL1/FPRL2/GPR152/GPR32 | 2357: NP_002020<br>2358: NP_001453<br>2359: NP_002021<br>390212: NP_996880<br>2854: NP_001497 | XP_218012<br>XP_001057995<br>XP_218016<br>XP_218022<br>XP_001073753<br>XP_001068404 | NP_038549<br>NP_032068<br>XP_622087<br>EDL38017<br>AAC34587<br>AAN63620<br>NP_996856<br>AAN63621 |                                                  | CAG11673                                                 | scaffold_3925                                         |
| GALR1                          | 2587: NP_001471                                                                               | NP_037090                                                                           | NP_032108                                                                                        | XP_426066<br>XP_414080                           | CAG00818<br>CAG12842                                     | FRUP00000149875<br>FRUP00000153302                    |
| GALR2/GALR3                    | 8811: NP_003848<br>8484: NP_003605                                                            | NP_062045<br>NP_062046                                                              | NP_034384<br>NP_056553                                                                           | XP_428968                                        | CAG12230                                                 | FRUP00000158738                                       |
| GPR1                           | 2825: NP_005270                                                                               | NP_037093                                                                           | NP_666362                                                                                        | XP_421955                                        |                                                          | FRUP00000131794                                       |
| GPR8/GPR7                      | 2831: NP_005276<br>2832: NP_005277                                                            | NP_001014784                                                                        | XP_136404                                                                                        | XP_419201<br>XP_425710                           | SCAF14682                                                |                                                       |
| GPR14                          | 2837: NP_061822                                                                               | NP_065412                                                                           | NP_663415                                                                                        | XP_425371<br>XP_425370<br>XP_425234<br>XP_416275 | CAF97882<br>CAG02581<br>CAG02582<br>CAG12512             | FRUP00000129229<br>FRUP00000164718<br>scaffold_2802   |
| GPR25/GPR15                    | 2838: NP_005281<br>2848: NP_005289                                                            | XP_221546<br>XP_344147                                                              | XP_156321<br>XP_357126                                                                           | XP_425528                                        | CAG11769                                                 |                                                       |
| GPR30                          | 2852: NP_001496                                                                               | NP_598257                                                                           | NP_084047                                                                                        | XP_414765                                        | CAG12216                                                 | FRUP00000146157                                       |
| GPR44                          | 11251: NP_004769                                                                              | NP_001012070                                                                        | NP_034092                                                                                        |                                                  | CAG03720                                                 | FRUP00000149198                                       |
| GPR54                          | 84634: NP_115940                                                                              | NP_076482                                                                           | NP_444474                                                                                        |                                                  | CAG06231                                                 | FRUP00000131919                                       |
| GPR139                         | 124274: XP_064062                                                                             | NP_001019412                                                                        | XP_146103                                                                                        | XP_428970                                        | CAG11412                                                 | AAP72123                                              |
| GPR142                         | 350383: NP_861455                                                                             | XP_577136                                                                           | NP_861414                                                                                        | XP_428957                                        | CAG03049                                                 | AAP72122                                              |
| GPR145                         | 84539: NP_115892                                                                              |                                                                                     |                                                                                                  |                                                  | CAF99158                                                 | FRUP00000144995                                       |
| GPR146                         | 115330: NP_612454                                                                             | XP_573364                                                                           | NP_084534                                                                                        | XP_414764                                        | CAG12217                                                 | scaffold_710                                          |
| GPR151                         | 134391: NP_919227                                                                             | Q7TSN5                                                                              | NP_853521                                                                                        |                                                  | CAG01252<br>CAG10137                                     | FRUP00000127188<br>scaffold_544                       |
| IL8RA                          | 3577: NP_000625                                                                               | NP_062183                                                                           | NP_839972                                                                                        |                                                  | CAF98991                                                 | FRUP00000127720                                       |
| IL8RB                          | 3579: NP_001548                                                                               | NP_058879                                                                           | NP_034039                                                                                        | XP_428206                                        | CAF98209<br>chr2_16451193_2269                           | FRUP00000131991<br>FRUP00000127485                    |
| LTB4R/LTB4R2                   | 1241: NP_858043<br>56413: NP_062813                                                           | NP_067688<br>NP_446092                                                              | NP_032545<br>NP_065236                                                                           | XP_425304<br>XP_413985                           | CAF97025<br>CAF97026<br>SCAF14685                        | FRUP00000157228<br>FRUP00000159672<br>FRUP00000164123 |
| GPR24                          | 2847: NP_005288                                                                               | NP_113946                                                                           | NP_660114                                                                                        | XP_420129                                        | CAF94024                                                 | FRUP00000130394                                       |
| OPRD1                          | 4985: NP_000902                                                                               | NP_036749                                                                           | NP_038650                                                                                        |                                                  | CAG00040                                                 | FRUP00000153740                                       |
| OPRK1                          | 4986: NP_000903                                                                               | NP_058863                                                                           | NP_035141                                                                                        | XP_426087                                        | CAG10221<br>CAG12280                                     | FRUP00000142489                                       |
| OPRL1                          | 4987: NP_000904                                                                               | NP_113757                                                                           | NP_035142                                                                                        | XP_417424                                        | CAG02324                                                 | FRUP00000132165                                       |
| OPRM1                          | 4988: NP_000905                                                                               | NP_037203                                                                           | NP_001034741                                                                                     | XP_419683                                        | CAG10056                                                 | FRUP00000162543                                       |
| RLN3R1/GPCR135/SALPR           | 51289: NP_057652                                                                              | NP_001008311                                                                        | NP_848832                                                                                        | XP_429217                                        | CAF97176<br>CAG01356<br>CAG07748                         | FRUP00000153586<br>FRUP00000155748                    |
| RLN3R2/GPCR142/ GPR100         | 339403: NP_871001                                                                             |                                                                                     | NP_861538                                                                                        |                                                  | CAF89883<br>CAF99357<br>CAF99875<br>CAF99890<br>CAF91545 | FRUP00000127644<br>FRUP00000129142<br>FRUP00000136065 |



| MRCA            | Human gene ID;<br>accession number | Rat                   | Mouse                  | Chicken                   | <i>T. nigroviridis</i>           | <i>T. rubripes</i>                                              |
|-----------------|------------------------------------|-----------------------|------------------------|---------------------------|----------------------------------|-----------------------------------------------------------------|
| SSTR1/SSTR4     | 6751: NP 001040<br>6754: NP 001043 | EDM03458<br>NP 037168 | NP 033242<br>NP 033245 | XP 426102<br>XP 001234905 |                                  | scaffold 707                                                    |
| SSTR2           | 6752: NP 001041                    | NP 062221             | NP 033243              | XP 425384                 | CAF96985<br>CAF96986             | AAL32173<br>GSCT00010055001 prot<br>scaffold 1772               |
| SSTR3           | 6753: NP 001042                    | NP_598206             | NP_033244              | NP_001019754              | CAF90874<br>CAG12520             | scaffold 958<br>scaffold 927<br>scaffold 958                    |
| SSTR5           | 6755: NP 001044                    | NP_037014             | XP_139909              | XP_425241                 | CAG06053                         |                                                                 |
| XCR1/GPR5       | 2829: NP 005274                    | XP_236740             | NP_035928              | XP_426012                 | CAG11634<br>chrUn 120676885 7499 | FRUP00000159812<br>chrUn:277232531 5721<br>chrUn:164653540 7809 |
| <b>Subtotal</b> |                                    |                       |                        |                           |                                  |                                                                 |
| <b>46</b>       | <b>62</b>                          | <b>61</b>             | <b>65</b>              | <b>46</b>                 | <b>70</b>                        | <b>68</b>                                                       |

### Subclass B

|                                        |                                                                                                         |                                                  |                                                               |                        |                                                          |                                                                          |
|----------------------------------------|---------------------------------------------------------------------------------------------------------|--------------------------------------------------|---------------------------------------------------------------|------------------------|----------------------------------------------------------|--------------------------------------------------------------------------|
| ADCYAP1R1                              | 117: NP 001109                                                                                          | NP_598195                                        | NP_031433                                                     | XP 425958<br>XP 418491 | CAF94168<br>CAF95249<br>CAF95250<br>CAG12267<br>CAG12268 | FRUP00000135842<br>FRUP00000161798<br>FRUP00000161801<br>FRUP00000161807 |
| BAI1                                   | 575: NP 001693                                                                                          | XP_343261                                        | NP_778156                                                     | XP_418415              | CAF97520<br>CAG10859                                     | FRUP00000164474                                                          |
| BAI2                                   | 576: NP 001694                                                                                          | XP_232778                                        | NP_775094                                                     | XP_423828              | CAF99436                                                 |                                                                          |
| BAI3                                   | 577: NP 001695                                                                                          | XP_217367                                        | NP_783573                                                     | XP_419892              | CAG09441<br>GSTENT00030703001                            | FRUP00000129349<br>FRUP00000143645<br>FRUP00000143649                    |
| CR                                     | 799: NP 001733                                                                                          | NP_446268                                        | NP_031614                                                     | XP_425985              | CAG11122<br>CAG13459                                     | FRUP00000144138<br>FRUP00000147908                                       |
| CLR                                    | 10203: NP 005786                                                                                        | NP_036849                                        | NP_061252                                                     | XP_421850              | CAF94370<br>CAF98969<br>CAG01331                         | FRUP00000145573<br>FRUP00000148605                                       |
| CD97                                   | 976: NP 510966                                                                                          | NP_001012164                                     | NP_036055                                                     |                        | CAG12162                                                 | FRUP00000150608                                                          |
| CELSR1                                 | 9620: NP 055061                                                                                         | XP_235570                                        | NP_034016                                                     | XP_423746              | CAG01167                                                 |                                                                          |
| CELSR2                                 | 1952: NP 001399                                                                                         | XP_342319                                        | NP_059088                                                     | XP 428195<br>XP 426750 | CAG06842                                                 | FRUP00000162857                                                          |
| CELSR3                                 | 1951: NP 001398                                                                                         | NP_112610                                        | NP_536685                                                     | XP_414354              | CAG03262                                                 | FRUP00000139273                                                          |
| CRHR1                                  | 1394: NP 004373                                                                                         | NP_112261                                        | NP_031788                                                     | NP_989652              | CAG03022                                                 | FRUP00000135485                                                          |
| CRHR2                                  | 1395: NP 001874                                                                                         | NP_073205                                        | NP_034083                                                     | NP_989785              |                                                          | scaffold_515                                                             |
| ELTD1                                  | 64123: XP 371262                                                                                        | NP_071630                                        | NP_573485                                                     | XP_422383              | CAG01189                                                 | FRUP00000131264                                                          |
| EMR1/EMR2/EMR3/EMR4b                   | 2015: NP 001965<br>30817: NP 690883<br>84658: NP 693634<br>326342: XP 377506                            | NP_001007558                                     | NP 034260<br>NP 631877                                        |                        | CAG04105                                                 | scaffold 1738                                                            |
| GCGR                                   | 2642: NP 000151                                                                                         | NP_742089                                        | NP_032127                                                     | XP_423402              | CAG01110<br>CAG03726                                     | FRUP00000135578                                                          |
| GHRHR                                  | 2692: NP 000814                                                                                         | NP_036982                                        | NP_001003685                                                  | XP_418490              | CAF95846                                                 | FRUP00000146088<br>FRUP00000146089                                       |
| GLP1R                                  | 2740: NP 002053                                                                                         | NP_036860                                        | NP_067307                                                     | XP_426129              | CAG04358                                                 | FRUP00000146170                                                          |
| GLP2R                                  | 9340: NP 004237                                                                                         | NP_068620                                        | NP_783612                                                     | XP_425358              | CAF96232                                                 | FRUP00000147245                                                          |
| GPR56                                  | 9289: NP 958932                                                                                         | NP_689448                                        | NP_061370                                                     | XP_413999              | CAG00694                                                 |                                                                          |
| GPR64                                  | 10149: NP 005747                                                                                        | NP_852031                                        | NP_848827                                                     | XP_416810              | CAG05443<br>CAG00549                                     | FRUP00000159461<br>FRUP00000143610                                       |
| GPR97                                  | 222487: NP 740746                                                                                       | XP_226243                                        | NP_766624                                                     | XP_413998              |                                                          | FRUP00000158285                                                          |
| GPR110/GPR111/GPR113/GPR115/<br>GPR116 | 268977: NP 079324 ;<br>222611: NP 722581<br>165082: NP 722577<br>221393: NP 722580<br>221395: NP 056049 | XP_217359<br>XP 236958<br>XP 233935<br>NP 620810 | NP_598537<br>XP 487485<br>XP 355587<br>XP 900079<br>XP 283438 | XP_420068<br>XP_420066 | CAG13000                                                 | FRUP00000150114<br>FRUP00000153997                                       |
| GPR112                                 | 139378: NP 722576                                                                                       | XP_229201                                        | XP_141802                                                     | XP_420232              | CAG09829<br>CAG11729                                     | FRUP00000140064<br>FRUP00000140065<br>FRUP00000159797                    |

| MRCA          | Human gene ID;<br>accession number   | Rat                    | Mouse                     | Chicken                   | <i>T. nigroviridis</i>          | <i>T. rubripes</i>                                                       |
|---------------|--------------------------------------|------------------------|---------------------------|---------------------------|---------------------------------|--------------------------------------------------------------------------|
| GPR114        | 221188; NP 722579                    | XP_240979              | XP_356118                 | XP_414000                 | CAG00691                        |                                                                          |
| GPR123        | 84435; NP 115798                     | XP_219468              | NP_803420                 | XP_421695                 | CAG10157                        |                                                                          |
| GPR124        | 25960; NP 116166                     | EDM09091               | NP_473385                 | ENSGALP00000004917        | CAF90106                        | FRUP00000146680                                                          |
| GPR125        | 166647; XP 291111                    | XP_223485              | XP_132089                 | XP_420763                 | CAF90021                        | FRUP00000153701                                                          |
| GPR126/GPR128 | 57211; NP 065188<br>84873; NP 116176 | XP 218313<br>XP 221527 | NP 001002268<br>NP 766413 | XP_419712                 | CAF94956                        | FRUP00000157379                                                          |
| GPR133        | 283383; NP_942122                    | XP_001078502           | NP_001074811              | XP_415094                 |                                 | FRUP00000137738                                                          |
| GPR144        | 347088; NP 872417                    | XP_578117              | XP_355327                 | XP_415385                 | CAG01306                        | scaffold_1674                                                            |
| LPHN1         | 22859; NP 055736                     | NP_599235              | NP_851382                 | XP_422382                 | CAG06092<br>chr3 11032320 65518 |                                                                          |
| LPHN2         | 23266; NP 036434                     | NP_075251              | NP_001074767              | XP 422209<br>XP 422381    | CAF95119<br>CAF98480            |                                                                          |
| LPHN3         | 23284; NP 056051                     | NP_570835              | NP_941991                 | XP_420575                 | CAF93446<br>CAG02284            |                                                                          |
| PTHR1         | 5745; NP 000307                      | NP_064458              | NP_035329                 | XP_425837                 | CAF98426<br>CAG12650            | FRUP00000144315<br>FRUP00000144316<br>FRUP00000162177                    |
| PTHR2         | 5746; NP 005039                      | NP_112351              | NP_644676                 | XP_418507                 | CAF97204                        | FRUP00000128587<br>FRUP00000128588                                       |
| VIPR1         | 7433; NP 004615                      | NP_036817              | NP_035833                 | XP 418492<br>NP 001006328 | CAF97690<br>CAG04243            | FRUP00000137925<br>FRUP00000137926<br>FRUP00000137928<br>FRUP00000140671 |
| VIPR2         | 7434; NP 003373                      | NP_058934              | NP_033537                 | NP_001014970              | CAF97773<br>CAF98740            | FRUP00000128391<br>FRUP00000158712                                       |
| VLGR1         | 84059; NP 115495                     | XP_342370              | XP_358310                 | XP_429120                 | CAG00389                        | FRUP00000164895<br>FRUP00000164896                                       |

|                 |           |           |           |           |           |           |
|-----------------|-----------|-----------|-----------|-----------|-----------|-----------|
| <b>Subtotal</b> |           |           |           |           |           |           |
| <b>38</b>       | <b>46</b> | <b>42</b> | <b>44</b> | <b>41</b> | <b>53</b> | <b>50</b> |

### Subclass C

|                      |                                                         |                                        |                                     |                           |                      |                                                       |
|----------------------|---------------------------------------------------------|----------------------------------------|-------------------------------------|---------------------------|----------------------|-------------------------------------------------------|
| CASR                 | 846; NP 000379                                          | NP_058692                              | NP_038831                           | XP_416491                 | CAG00571             | BAA26122                                              |
| GABBR1               | 2550; NP 068703                                         | NP_112290                              | NP_062312                           |                           | CAG02742             | FRUP00000145292                                       |
| GPRC5B/GPRC5A/GPRC5D | 9052; NP 003970<br>51704; NP 057319<br>55507; NP 061124 | NP 001073359<br>XP 215095<br>XP 575701 | NP 852109<br>NP 071865<br>NP 444348 | XP 416200<br>XP 001233984 | CAG06055<br>CAG11409 | FRUP00000134725<br>FRUP00000143419                    |
| GPRC5C               | 55890; NP 061123                                        | XP_213518                              | NP_671750                           | XP_425386                 | CAG00236<br>CAG03050 | FRUP00000130654<br>FRUP00000137392<br>FRUP00000164268 |
| GPRC6A               | 222545; NP 683766                                       | XP_228164                              | NP_694711                           | XP_426177                 |                      | FRUP00000133733<br>FRUP00000163538                    |
| GPR51                | 9568; NP 005449                                         | NP_113990                              | XP_143750                           | XP_419066                 | CAG10041             | FRUP00000128923                                       |
| GRM1                 | 2911; NP 000829                                         | NP_058707                              | NP_058672                           | XP_419652                 | CAG03586<br>CAG13194 | FRUP00000135014<br>FRUP00000143714                    |
| GRM2                 | 2912; NP 000830                                         | XP_343471                              | AAO85115                            | XP_425148                 | CAG06804<br>CAG06963 | FRUP00000141550<br>FRUP00000149314                    |
| GRM3                 | 2913; NP 000831                                         | XP_001069653                           | NP_862898                           | XP_416842                 | CAG13037             | FRUP00000129944                                       |
| GRM4                 | 2914; NP 000832                                         | NP_073157                              | XP_196179                           | XP_418031                 | CAG04030             | FRUP00000150481                                       |
| GRM5                 | 2915; NP 000833                                         | NP_058708                              | XP_149971                           | NP_989469                 | CAG00460             | FRUP00000140545<br>FRUP00000140546                    |
| GRM6                 | 2916; NP 000834                                         | NP_075209                              | NP_775548                           | XP_428614                 | CAF89911             | FRUP00000164837                                       |
| GRM7                 | 2917; NP 870990                                         | NP_112302                              | NP_796302                           | XP_414442                 | CAF96886<br>CAG11283 | FRUP00000132600<br>FRUP00000164838                    |
| GRM8                 | 2918; NP 000836                                         | NP_071538                              | NP_032200                           | XP_425426                 | CAG01066<br>CAG12082 | FRUP00000147943<br>FRUP00000150688                    |

|                 |           |           |           |           |           |           |
|-----------------|-----------|-----------|-----------|-----------|-----------|-----------|
| <b>Subtotal</b> |           |           |           |           |           |           |
| <b>14</b>       | <b>16</b> | <b>16</b> | <b>16</b> | <b>14</b> | <b>19</b> | <b>23</b> |

| MRCA | Human gene ID;<br>accession number | Rat | Mouse | Chicken | <i>T. nigroviridis</i> | <i>T. rubripes</i> |
|------|------------------------------------|-----|-------|---------|------------------------|--------------------|
|------|------------------------------------|-----|-------|---------|------------------------|--------------------|

**Subclass F**

|           |                                    |                        |                        |                        |                      |                                                                     |
|-----------|------------------------------------|------------------------|------------------------|------------------------|----------------------|---------------------------------------------------------------------|
| FZD1/FZD2 | 8321: NP_003496<br>2535: NP_001457 | NP_067089<br>NP_742032 | NP_067432<br>NP_065256 | XP_418648<br>NP_989553 | CAG02812             | FRUP00000148265                                                     |
| FZD3      | 7976: NP_059108                    | NP_703204              | NP_067433              | XP_420029              | CAG00137<br>CAG11035 | FRUP00000137946<br>FRUP00000150170                                  |
| FZD4      | 8322: NP_036325                    | NP_072145              | NP_032081              | NP_989430              | CAF96654             | FRUP00000140126                                                     |
| FZD5      | 7855: NP_003459                    | NP_776210              | NP_073558              | XP_426568              | CAF94116             | FRUP00000135762                                                     |
| FZD6      | 8323: NP_003497                    | XP_343231              | NP_032082              | XP_418372              | CAF98078             | FRUP00000130766                                                     |
| FZD7      | 8324: NP_003498                    | XP_237191              | NP_032083              | NP_989552              | CAF91294<br>CAG01343 | FRUP00000143203                                                     |
| FZD8      | 8325: NP_114072                    | XP_344617              | NP_032084              | XP_418566              | CAF97764<br>CAF98771 | FRUP00000148131<br>FRUP00000159741<br>scaffold 122<br>scaffold 1549 |
| FZD9      | 8326: NP_003499                    | NP_695217              | XP_284144              | XP_425392              | CAF91428             | FRUP00000142700                                                     |
| FZD10     | 11211: NP_009128                   | ENSRNOT00000029702     | NP_780493              | NP_989429              | CAF94498             | FRUP00000142418                                                     |
| SMO       | 6608: NP_005622                    | NP_036939              | NP_795970              | XP_414970              | CAF97226             | FRUP00000141346                                                     |

**Subtotal**

|           |           |           |           |           |           |           |
|-----------|-----------|-----------|-----------|-----------|-----------|-----------|
| <b>10</b> | <b>11</b> | <b>11</b> | <b>11</b> | <b>11</b> | <b>13</b> | <b>14</b> |
|-----------|-----------|-----------|-----------|-----------|-----------|-----------|

**Table S2 C. List of nGPCR genes for which an ancestral form in the MRCA of tetrapods and teleosts can not be defined.**

**Tetrapod-specific genes**

**Class A**

**Subclass A1**

| Gene Name | Human Gene ID | Rat       | Mouse     | Chicken | <i>T. nigroviridis</i> | <i>T. rubripes</i> |
|-----------|---------------|-----------|-----------|---------|------------------------|--------------------|
| OPN1MW    | 2652          | NP_446000 | NP_032132 |         |                        |                    |

**Subclass A2**

|             |        |                                                                                                         |                                                                                              |  |  |  |
|-------------|--------|---------------------------------------------------------------------------------------------------------|----------------------------------------------------------------------------------------------|--|--|--|
| TRAR3f/TAR3 | 134860 | NP_783175<br>NP_783176<br>NP_001009975<br>NP_783181<br>NP_783180<br>NP_783178<br>NP_783177<br>NP_783192 | NP_001010831<br>NP_001010827<br>NP_001010829<br>NP_001010835<br>NP_001010838<br>NP_001010839 |  |  |  |
|-------------|--------|---------------------------------------------------------------------------------------------------------|----------------------------------------------------------------------------------------------|--|--|--|

**Subclass A4**

|              |        |  |           |           |  |  |
|--------------|--------|--|-----------|-----------|--|--|
| GPR109B/HM74 | 8843   |  |           |           |  |  |
| GPR82        | 27197  |  | NP_783600 | NW_060226 |  |  |
| OXER1/TG1019 | 165140 |  |           |           |  |  |

**Subclass A5**

|                     |        |           |           |           |  |  |
|---------------------|--------|-----------|-----------|-----------|--|--|
| GNRHR               | 2798   | NP_112300 | NP_034453 | NP_989984 |  |  |
| GPR150/PGR11        | 285601 | XP_574811 | NP_780704 |           |  |  |
| GPR154/NPS receptor | 387129 | XP_235968 | NP_783609 | XP_426022 |  |  |

**Subclass A7**

|        |        |           |           |           |  |  |
|--------|--------|-----------|-----------|-----------|--|--|
| BDKRB2 | 624    | NP_775123 | NP_033877 | XP_426461 |  |  |
| CCBP2  | 1238   | NP_511176 | NP_067622 | XP_418499 |  |  |
| CCR8   | 1237   | XP_236704 | NP_031746 | XP_418819 |  |  |
| CCRL2  | 9034   | XP_236658 | NP_059494 |           |  |  |
| CXCR6  | 10663  |           | NP_109637 | AAC23950  |  |  |
| FY     | 2532   | NW_047399 | NP_034175 |           |  |  |
| GPR120 | 338557 | XP_215281 | NP_861413 | XP_426520 |  |  |

**Subclass A8**

|             |        |              |           |                                                  |  |  |
|-------------|--------|--------------|-----------|--------------------------------------------------|--|--|
| MAS1        | 4142   | NP_036889    | NP_032578 | XP_427992<br>XP_427991<br>XP_426151<br>XP_423677 |  |  |
| MAS1L       | 116511 |              |           |                                                  |  |  |
| MRGPRD      | 116512 | NP_001001506 | NP_987075 |                                                  |  |  |
| MRGPRE      | 116534 | NP_001002288 | NP_780743 |                                                  |  |  |
| MRGPRF/MRGF | 116535 | NP_714944    | NP_663354 |                                                  |  |  |
| MRGPRG/MRGG | 386746 | NP_982296    | NP_987077 |                                                  |  |  |
| MRGPRH      |        | NP_001002281 | NP_109651 |                                                  |  |  |

|              |        |                                                                                                                                                         |                                                                                                                                                                                                                               |  |  |  |
|--------------|--------|---------------------------------------------------------------------------------------------------------------------------------------------------------|-------------------------------------------------------------------------------------------------------------------------------------------------------------------------------------------------------------------------------|--|--|--|
| MRGX1e/MRGX1 | 259249 |                                                                                                                                                         |                                                                                                                                                                                                                               |  |  |  |
| MRGX2e/MRGX2 | 117194 | NP_665730<br>NP_001002282<br>NP_001002286<br>NP_750845                                                                                                  | NP_694735<br>NP_694741<br>NP_694707<br>NP_705744<br>NP_997417<br>NP_991390<br>NP_997418<br>NP_997419<br>NP_997423<br>AX299180<br>AX299182<br>AX299184<br>AX299186<br>AX299188<br>AX299190<br>AX299192<br>AX299194<br>AX299200 |  |  |  |
| MRGX3e/MRGX3 | 117195 |                                                                                                                                                         |                                                                                                                                                                                                                               |  |  |  |
| MRGX4e/MRGX4 | 117196 |                                                                                                                                                         |                                                                                                                                                                                                                               |  |  |  |
| rat_MrgB3    |        | NP_001002280<br>NP_001002285<br>AAQ08313<br>NP_001002287<br>NP_001002284<br>AAQ08316<br>GeneID_404639<br>NP_001002283<br>GeneID_404654<br>GeneID_404657 | NP_780740<br>NP_997420<br>NP_991364<br>NP_997421<br>NP_997422<br>NP_991379<br>AX299214                                                                                                                                        |  |  |  |

### Class B

|      |      |           |              |           |  |  |
|------|------|-----------|--------------|-----------|--|--|
| GIPR | 2696 | NP_036846 | NP_001074284 |           |  |  |
| SCTR | 6344 | NP_112377 | NP_001012322 | XP_422120 |  |  |

### Teleost-specific genes

#### Class A

##### Subclass A1

|             |  |  |  |  |                                        |                                                       |
|-------------|--|--|--|--|----------------------------------------|-------------------------------------------------------|
| OPN1MW-like |  |  |  |  | CAG06878.1<br>CAG08706.1<br>CAG10163.1 | FRUP00000141947<br>FRUP00000144085<br>FRUP00000151874 |
|-------------|--|--|--|--|----------------------------------------|-------------------------------------------------------|

##### Subclass A2

|             |  |  |  |  |            |                          |
|-------------|--|--|--|--|------------|--------------------------|
| ADRA2D-like |  |  |  |  | CAF91577.1 | CAC87886.1<br>CAC87887.1 |
|-------------|--|--|--|--|------------|--------------------------|

##### Subclass A5

|           |  |  |  |  |                          |                                                       |
|-----------|--|--|--|--|--------------------------|-------------------------------------------------------|
| CCKR-like |  |  |  |  | CAG00996.1<br>CAG05857.1 | FRUP00000135669<br>FRUP00000162216<br>FRUP00000162217 |
|-----------|--|--|--|--|--------------------------|-------------------------------------------------------|

**Table S2 D. Correlation coefficients of nGPCR inventories between pairs of species.**

|                               | <b>Human</b> | <b>Rat</b> | <b>Mouse</b> | <b>Chicken</b> | <b><i>T. nigroviridis</i></b> | <b><i>T. rubripes</i></b> |
|-------------------------------|--------------|------------|--------------|----------------|-------------------------------|---------------------------|
| <b>Human</b>                  | 1            | 0.8754     | 0.9136       | 0.5012         | 0.1239                        | 0.0696                    |
| <b>Rat</b>                    | 0.8754       | 1          | 0.9561       | 0.4943         | 0.2071                        | 0.1150                    |
| <b>Mouse</b>                  | 0.9136       | 0.9561     | 1            | 0.5003         | 0.2159                        | 0.1165                    |
| <b>Chicken</b>                | 0.5012       | 0.4943     | 0.5003       | 1              | 0.1659                        | 0.1871                    |
| <b><i>T. nigroviridis</i></b> | 0.1239       | 0.2071     | 0.2159       | 0.1659         | 1                             | 0.7903                    |
| <b><i>T. rubripes</i></b>     | 0.06960      | 0.1150     | 0.1165       | 0.1871         | 0.7903                        | 1                         |

**Table S2 E. Number of singleton and duplicated nGPCR genes in model vertebrates, and the number of nGPCR families with gene duplicates in each species.**

|                                                                                                 | Human                 | Rat                   | Mouse                 | Chicken               | <i>T. nigroviridis</i> | <i>T. rubripes</i>    |
|-------------------------------------------------------------------------------------------------|-----------------------|-----------------------|-----------------------|-----------------------|------------------------|-----------------------|
| <b>Singletons<br/>(% of total)</b>                                                              | <b>225<br/>(67.8)</b> | <b>216<br/>(67.7)</b> | <b>218<br/>(65.7)</b> | <b>185<br/>(62.5)</b> | <b>149<br/>(35.1)</b>  | <b>148<br/>(34.4)</b> |
| <b>Duplicates<br/>(% of total)</b>                                                              | <b>107<br/>(32.2)</b> | <b>103<br/>(32.3)</b> | <b>114<br/>(34.3)</b> | <b>111<br/>(37.5)</b> | <b>276<br/>(64.9)</b>  | <b>282<br/>(65.6)</b> |
| <b>Total</b>                                                                                    | <b>332</b>            | <b>319</b>            | <b>332</b>            | <b>296</b>            | <b>425</b>             | <b>430</b>            |
| <b>No. of nGPCR<br/>families with<br/>duplicates<br/>(% of total<br/>families<br/>analyzed)</b> | <b>44<br/>(16.4)</b>  | <b>42<br/>(16.3)</b>  | <b>44<br/>(16.8)</b>  | <b>50<br/>(21.3)</b>  | <b>111<br/>(42.7)</b>  | <b>106<br/>(41.7)</b> |
| <b>No. of nGPCR<br/>families<br/>identified</b>                                                 | <b>269</b>            | <b>258</b>            | <b>262</b>            | <b>235</b>            | <b>260</b>             | <b>254</b>            |
