# Supplementary material for: GPCR Genes Are Preferentially Retained after Whole Genome Duplication
Source: PubMed Central journal article supplement (PMC2270905; doi:10.1371/journal.pone.0001903), 2008-04-02
Supplement: pone.0001903.s005.pdf [file pone.0001903.s005.pdf]

**Table S3 A. Tandem duplication-derived nGPCRs of *T. nigroviridis***

|    | Class | MRCA           | <i>T. nigroviridis</i><br>chromosome | <i>T. nigroviridis</i><br>copy 1 | <i>T. nigroviridis</i><br>copy 2 | Human<br>chromosome |
|----|-------|----------------|--------------------------------------|----------------------------------|----------------------------------|---------------------|
| 1  | A1    | GPR62          | chr11                                | CAG06806.1                       | CAG06960.1                       | chr3                |
| 2  | A1    | GPR101         | chr1                                 | CAG09823.1                       | SCAF13862                        | chrX                |
| 3  | A1    | OPN5           | chr9                                 | CAG03922.1                       | CAG11258.1                       | chr6                |
| 4  | A1    | OPN5           | chr14                                | CAG13006.1                       | CAG00077.1                       | chr6                |
| 5  | A1    | RHO            | chr9                                 | CAG11315.1                       | CAG11334.1                       | chr3                |
| 6  | A2    | ADORA1/ADORA3  | chr11                                | CAF96797.1                       | CAG11815.1                       | chr1                |
| 7  | A2    | HTR2B          | chr1                                 | CAC85912.1                       | CAC86247.1                       | chr2                |
| 8  | A3    | EDG5           | chr3                                 | SCAF15050                        | chr3_11567k-11569k               | chr19               |
| 9  | A4    | GPR4/GPR132    | chr16                                | CAF97465.1                       | CAG12733.1                       | chr19               |
| 10 | A4    | EBI2           | chr2                                 | CAG07299.1                       | chr2:7825k-7877k                 | chr13               |
| 11 | A5    | AVPR2          | chr9                                 | CAG03798.1                       | CAG07446.1                       | chrX                |
| 12 | A5    | GPR103         | chr2_random                          | CAG04805.1                       | SCAF14750                        | chr4                |
| 13 | A5    | OXTR           | chr11                                | CAG06809.1                       | CAG06958.1                       | chr3                |
| 14 | A5    | TACR2/TACR3    | chr18                                | CAG01274.1                       | CAG11520.1                       | chr4                |
| 15 | A7    | RLN3R1/GPCR135 | chr5                                 | CAF99875.1                       | CAF99890.1                       | chr5                |
| 16 | B     | BAI3           | chr17                                | CAG09441.1                       | GSTENT0003070300<br>1            | chr6                |
| 17 | C     | GRM2           | chr11                                | CAG06804.1                       | CAG06963.1                       | chr3                |

**Table S3 B. Summary of nGPCRs derived from tandem duplication in tetrapods.**

|    | <b>Subclass</b>                                         | <b>MRCA</b>      | <b>Human</b> | <b>Rat</b> | <b>Mouse</b> | <b>Chicken</b> |
|----|---------------------------------------------------------|------------------|--------------|------------|--------------|----------------|
| 1  | <b>A1</b>                                               | <b>OPN5</b>      |              |            |              | 2              |
| 2  | <b>A2</b>                                               | <b>ADORA1</b>    |              |            |              | 2              |
| 3  |                                                         | <b>TRAR3f</b>    |              | 8          | 6            |                |
| 4  |                                                         | <b>TRAR1</b>     | 3            | 4          | 5            |                |
| 5  |                                                         | <b>TRAR4</b>     | 2            | 4          | 5            |                |
| 6  | <b>A3</b>                                               | <b>PTGER2</b>    | 2            | 2          | 2            |                |
| 7  | <b>A4</b>                                               | <b>P2RY12</b>    | 3            | 2          | 3            | 3              |
| 8  |                                                         | <b>GPR174</b>    | 2            | 2          | 2            | 3              |
| 9  |                                                         | <b>CYSLTR1</b>   |              |            |              | 2              |
| 10 |                                                         | <b>GPR23</b>     | 4            | 3          | 2            |                |
| 11 |                                                         | <b>GPR43</b>     | 2            | 2          | 2            |                |
| 12 |                                                         | <b>GPR109A</b>   | 2            | 2          | 2            |                |
| 13 |                                                         | <b>GPR41</b>     | 2            |            |              |                |
| 14 | <b>A5</b>                                               | <b>NPY5R</b>     | 2            | 2          | 2            | 2              |
| 15 |                                                         | <b>PKR1</b>      | 2            | 2          | 2            | 2              |
| 16 | <b>A7</b>                                               | <b>CCR4</b>      | 5            | 6          | 4            | 3              |
| 17 |                                                         | <b>UTS2R</b>     |              |            |              | 2              |
| 18 |                                                         | <b>LTB4R</b>     | 2            | 2          | 2            |                |
| 19 |                                                         | <b>FPR1</b>      | 4            | 6          | 7            |                |
| 20 | <b>A8</b>                                               | <b>MAS1</b>      | 7            | 17         | 28           | 3              |
| 21 | <b>B</b>                                                | <b>GPR116</b>    | 4            | 3          | 4            | 3              |
| 22 |                                                         | <b>ADCYAP1R1</b> |              |            |              | 2              |
| 23 |                                                         | <b>EMR1</b>      | 4            |            | 2            |                |
| 24 | <b>C</b>                                                | <b>GPRC5B</b>    | 4            | 3          | 4            |                |
|    | <b>Total number of TD-derived genes</b>                 |                  | 56           | 70         | 84           | 29             |
|    | <b>Total number of orthologous nGPCR groups with TD</b> |                  | 18           | 17         | 18           | 12             |

TD, Tandem duplication

**Table S3 C. List of tandem duplication-derived nGPCRs of tetrapods.**

| Origin of duplication         |    | Subclass | MRCAs         | Human Gene Name                                               | Human                                                                                     | Rat                                                                                                                                                                                                                   | Mouse                                                                                                                                                                                                                                                                                                      | Chick                                 |
|-------------------------------|----|----------|---------------|---------------------------------------------------------------|-------------------------------------------------------------------------------------------|-----------------------------------------------------------------------------------------------------------------------------------------------------------------------------------------------------------------------|------------------------------------------------------------------------------------------------------------------------------------------------------------------------------------------------------------------------------------------------------------------------------------------------------------|---------------------------------------|
| Present in all four tetrapods | 1  | A4       | P2RY12        | GPR171, GPR87, P2RY12                                         | NP_037440, NP_076404, NP_795345                                                           | XP_227177, NP_073637                                                                                                                                                                                                  | NP_775574, NP_115775, NP_081847                                                                                                                                                                                                                                                                            | XP_422842, XP_422840, XP_422839       |
|                               | 2  | A4       | GPR174        | GPR174, P2RY10                                                | NP_115942, NP_938147                                                                      | XP_228495, XP_228500                                                                                                                                                                                                  | XP_142040, NP_766023                                                                                                                                                                                                                                                                                       | NP_001008464, XP_420149, XP_420148    |
|                               | 3  | A5       | NPY5R         | NPY1R                                                         | NP_000900, NP_006165                                                                      | NP_001013050, NP_037001                                                                                                                                                                                               | NP_035064, NP_057917                                                                                                                                                                                                                                                                                       | XP_426285, NP_001026301               |
|                               | 4  | A5       | PKR1          | GPR73L1, PKR1                                                 | NP_658986, NP_620414                                                                      | NP_620434, NP_620433                                                                                                                                                                                                  | NP_659193, NP_067356                                                                                                                                                                                                                                                                                       | XP_419334, XP_419333                  |
|                               | 5  | A7       | CCR4          | CCR1, CCR2, CCR3, CCR4, CCR5                                  | NP_001286, NP_000639, NP_847899, NP_005499, NP_000570                                     | NP_065417, XP_236742, NP_068638, NP_446410, NP_598216, NP_446412                                                                                                                                                      | NP_034042, NP_034045, NP_034044, NP_034046                                                                                                                                                                                                                                                                 | XP_426017, NP_001039300, NP_001039299 |
|                               | 6  | A8       | MAS1          | MAS1, MRGPRD, MRGPRDE, MRGPRF, MRGX1e, MRGX2e, MRGX3e, MRGX4e | NP_944605, NP_659452, NP_671732, NP_473371, NP_473372, NP_473373, NP_000530               | NP_036889, NP_001001506, NP_001002288, NP_714944, NP_982296, NP_001002282, NP_001002286, NP_665730, NP_750845, AAQ08313, AAQ08316, NP_001002280, NP_001002283, NP_001002284, NP_001002285, NP_001002287, NP_001002281 | NP_987075, NP_780743, NP_663354, NP_987077, NP_997423, NP_694707, NP_694735, NP_694741, NP_705744, NP_991390, NP_997417, NP_997418, NP_997419, NP_780740, NP_991364, NP_991379, NP_997420, NP_997421, NP_997422, NP_109651, AX299180, AX299182, AX299184, AX299186, AX299188, AX299190, AX299192, AX299194 | XP_427992, XP_427991, XP_423677       |
|                               | 7  | B        | GPR116        | GPR110, GPR111, GPR115, GPR116                                | NP_079324, NP_722581, NP_722580, NP_056049                                                | XP_217359, XP_236958, NP_620810                                                                                                                                                                                       | NP_598537, XP_487485, XP_128679, XP_283438                                                                                                                                                                                                                                                                 | XP_420068, XP_420066                  |
| 8                             | A4 | GPR41    | GPR41, GPR42a | NP_005295, NP_005296                                          |                                                                                           |                                                                                                                                                                                                                       |                                                                                                                                                                                                                                                                                                            |                                       |
| 9                             | A2 | TRAR3f   |               |                                                               | NP_001009975, NP_783175, NP_783176, NP_783177, NP_783178, NP_783180, NP_783181, NP_783192 | NP_001010831, NP_001010827, NP_001010829, NP_001010835, NP_001010838, NP_001010839                                                                                                                                    |                                                                                                                                                                                                                                                                                                            |                                       |

|                                |    |      |                         |                                            |                                            |                                                                           |                                                                         |                         |
|--------------------------------|----|------|-------------------------|--------------------------------------------|--------------------------------------------|---------------------------------------------------------------------------|-------------------------------------------------------------------------|-------------------------|
| <b>Present only in mammals</b> | 10 | A2   | TRAR1                   | GPR57g, PNRe, TRAR1                        | NC_000006, NP_003958, NP_778227            | NP_001009532, NP_001009650, NP_599155, NP_783173                          | NP_001008429, NP_001009574, NP_038736, NP_444435                        |                         |
|                                | 11 | A2   | TRAR4                   | TRAR4, TRAR5                               | NP_778237, NP_444508                       | NP_783174, NP_783189, NP_783190, NP_783191                                | NP_001010828, NP_001008499, NP_001010830, NP_001010840, NP_001010837    |                         |
|                                | 12 | A3   | PTGER2                  | PTGDR, PTGER2                              | NP_000944, NP_000947                       | NP_071577, NP_112350                                                      | NP_032988, NP_032990                                                    |                         |
|                                | 13 | A4   | GPR23                   | GPR23, GPR35, GPR55, GPR92                 | NP_005292, NP_005674                       | NP_001032436, AAD22411, XP_575667                                         | NP_071715, XP_136804                                                    |                         |
|                                | 14 | A4   | GPR43                   | GPR40, GPR43                               | NP_005294, NP_005297                       | NP_695216, NP_001005877                                                   | NP_918946, NP_666299                                                    |                         |
|                                | 15 | A4   | GPR109A                 | GPR109A, GPR31, GPR81                      | NP_808219, NP_115943                       | NP_852141, NP_780729                                                      | NP_109626, NP_780729                                                    |                         |
|                                | 16 | A7   | LTB4R                   | LTB4R, LTB4R2                              | NP_858043, NP_062813                       | NP_067688, NP_446092                                                      | NP_032545, NP_065236                                                    |                         |
|                                | 17 | A7   | FPR1                    | FPR1, FPRL1, FPRL2, GPR152, GPR32          | NP_002020, NP_001453, NP_002021, NP_001497 | XP_218012, XP_218016, XP_218022, XP_001057995, XP_001073753, XP_001068404 | NP_038549, NP_032068, XP_622087, EDL38017, AAC34587, AAN63620, AAN63621 |                         |
|                                | 18 | C    | GPRC5B                  | GPRC5A, GPRC5B, GPRC5D, C5R1, GPR77        | NP_003970, NP_061124, NP_001727, NP_060955 | NP_001073359, XP_575701, NP_001003710                                     | NP_852109, NP_444348, NP_031603, NP_795886                              |                         |
| 19                             | B  | EMR1 | EMR1, EMR2, EMR3, EMR4b | NP_001965, NP_690883, NP_693634, XP_377506 |                                            | NP_034260, NP_631877                                                      |                                                                         |                         |
| <b>Present only in chicken</b> | 20 | A1   | OPN5                    | OPN5                                       |                                            |                                                                           |                                                                         | XP_426228, XP_420056    |
|                                | 21 | A2   | ADORA1                  | ADORA1                                     |                                            |                                                                           |                                                                         | NP_989647, NP_989482    |
|                                | 22 | A4   | CYSLTR1                 | CYSLTR1                                    |                                            |                                                                           |                                                                         | XP_426249, XP_425629    |
|                                | 23 | A7   | UTS2R                   | UTS2R                                      |                                            |                                                                           |                                                                         | XP_425371, XP_425370    |
|                                | 24 | B    | ADCYAP1R1               | ADCYAP1R1                                  |                                            |                                                                           |                                                                         | XP_425958, NP_001092076 |

**Table S3 D. WGD-derived nGPCRs of *T. nigroviridis***

| Class | MRCA          | <i>T. nigroviridis</i> chromosomes | <i>T. nigroviridis</i> copy 1 | <i>T. nigroviridis</i> copy 2 | Human chromosome |
|-------|---------------|------------------------------------|-------------------------------|-------------------------------|------------------|
| A1    | GPR26         | chr 2;17                           | CAG05074.1                    | GSTENT00035915001             | chr10            |
| A1    | GPR61         | chr 9;11                           | CAG06826.1                    | CAG07504.1                    | chr1             |
| A1    | OPN3-like     | chr 1;7                            | CAG08854.1                    | CAG09827.1                    | chrX             |
| A1    | OPN4          | chr 4;12                           | CAF99228.1                    | CAG08413.1                    | chr10            |
| A1    | RE2/GPR161    | chr 2;17                           | CAG05829.1                    | CAG09451.1                    | chr1             |
| A1    | RGR           | chr 2;17                           | CAF98663.1                    | CAG13313.1                    | chr10            |
| A1    | RHO           | chr 9;11                           | CAG06941.1                    | CAG11334.1                    | chr3             |
| A2    | ADORA1/ADORA3 | chr 9;11                           | CAG07486.1                    | CAG11815.1                    | chr1             |
| A2    | ADRA1B/GPR88  | chr 1;7                            | CAF92745.1                    | CAF97256.1                    | chr5             |
| A2    | ADRA2A        | chr 17;18                          | CAG01293.1                    | CAG05052.1                    | chr10            |
| A2    | CHRM2         | chr 13;19                          | CAG02408.1                    | CAG03403.1                    | chr7             |
| A2    | CHRM4         | chr 3;13                           | CAG05625.1                    | CAG06610.1                    | chr11            |
| A2    | DRD1          | chr 1;7                            | CAF95884.1                    | CAG11724.1                    | chr5             |
| A2    | GPR21         | chr 4;12                           | CAF93159.1                    | CAG09652.1                    | chr9             |
| A2    | HRH2          | chr 1;7                            | CAG01551.1                    | CAG04750.1                    | chr5             |
| A2    | HRH4/HRH3     | chr 1;15                           | CAG07613.1                    | CAG10949.1                    | chr18            |
| A3    | CNR1          | chr 10;14                          | CAG09211.1                    | CAG10478.1                    | chr6             |
| A3    | PTGER4        | chr 4;12                           | CAF97110.1                    | CAG09586.1                    | chr5             |
| A4    | GPR20         | chr 8;21                           | CAF99361.1                    | CAG11945.1                    | chr8             |

| Class | MRCA                  | <i>T. nigroviridis</i> chromosomes | <i>T. nigroviridis</i> copy 1 | <i>T. nigroviridis</i> copy 2 | Human chromosome |
|-------|-----------------------|------------------------------------|-------------------------------|-------------------------------|------------------|
| A4    | P2RY2                 | chr 7;10                           | CAG00917.1                    | CAF97358.1                    | chr11            |
| A4    | P2Y5/P2RY5            | chr 7;16                           | CAG02919.1                    | CAG12785                      | chr13            |
| A5    | EDNRB                 | chr 2;15                           | CAF97649.1                    | CAG05905.1                    | chr13            |
| A5    | GPR74/NPFF receptor 2 | chr 4;12                           | CAF97104.1                    | CAG07773.1                    | chr4             |
| A5    | GRPR/BRS3             | chr 2;5                            | CAF99824.1                    | CAG05835.1                    | chrX             |
| A7    | IL8RB                 | chr2;3                             | CAF98209.1                    | chr2:16451193_2269            | chr2             |
| A7    | CXCR4                 | chr 2;15                           | CAF97662.1                    | CAG01848.1                    | chr2             |
| A7    | RLN3R1                | chr 1;15                           | CAG01356.1                    | CAG07748.1                    | chr19            |
| A7    | RLN3R2                | chr 5;13                           | CAF89883.1                    | CAF99875.1                    | chr15            |
| B     | CLR                   | chr 2;3                            | CAF98969.1                    | CAG01331.1                    | chr2             |
| B     | GPR64                 | chr 6;7                            | CAG00549.1                    | CAG05443.1                    | chrX             |
| B     | GPR112                | chr 1;7                            | CAG09829.1                    | CAG11729.1                    | chrX             |
| B     | LPHN1                 | chr 3;18                           | CAG06092                      | chr3_11032320_65518           | chr19            |
| B     | LPHN2                 | chr 1;15                           | CAF95119                      | CAF98480                      | chr1             |
| B     | VIPR1                 | chr 6;15                           | CAF97690.1                    | CAG04243.1                    | chr3             |
| C     | GPRC5B/GPRC5A/GPRC5D  | chr 3;18                           | CAG06055.1                    | CAG11409.1                    | chr16            |
| C     | GPRC5C                | chr 2;3                            | CAG00236.1                    | CAG03050.1                    | chr17            |
| C     | GRM1                  | chr 10;14                          | CAG03586.1                    | CAG13194.1                    | chr6             |
| C     | GRM7                  | chr 9;11                           | CAF96886.1                    | CAG11283.1                    | chr3             |
| F     | FZD7                  | chr 2;3                            | CAF91294.1                    | CAG01343.1                    | chr2             |

**Table S3 E. Schematic representation of the WGD-derived *GPR61* duplicates on *T. nigroviridis* chromosomes 9 and 11.**

| First syntenic region on <i>T. nigroviridis</i> chromosome 11 | Gene                   | Human Chromosome 1             | Second syntenic region on <i>T. nigroviridis</i> chromosome 9 |
|---------------------------------------------------------------|------------------------|--------------------------------|---------------------------------------------------------------|
| 11 : 5919052-5922303                                          | AHCYL1                 | 1 : 110239350-110277038        | -                                                             |
| 11 : 5924983-5929169                                          | NP_149079.2            | 1 : 110289296-110309287        | -                                                             |
| 11 : 5931462-5935646                                          | SLC6A17                | 1 : 110446636-110453108        | -                                                             |
| 11 : 5931462-5935646                                          | SLC6A17                | 1 : 110421594-110429630        | -                                                             |
| 11 : 5940778-5943221                                          | RBM15                  | 1 : 110593170-110601337        | -                                                             |
| -                                                             | EPS8L3                 | 1 : 110004744-110018606        | 9 : 2866270-2869733                                           |
| -                                                             | GSTM3                  | 1 : 109988596-109995702        | 9 : 2869973-2872055                                           |
| -                                                             | GSTM4                  | 1 : 109910745-109920166        | 9 : 2869973-2872055                                           |
| -                                                             | GSTM2                  | 1 : 109922733-109929947        | 9 : 2869973-2872055                                           |
| -                                                             | GSTM5                  | 1 : 109942484-109948409        | 9 : 2869973-2872055                                           |
| -                                                             | GSTM1                  | 1 : 109966907-109972930        | 9 : 2869973-2872055                                           |
| -                                                             | AMPD2                  | 1 : 109874501-109886798        | 9 : 2873619-2877462                                           |
| -                                                             | GNAT2                  | 1 : 109857817-109867747        | 9 : 2901821-2907129                                           |
| 11 : 5947339-5948830                                          | <b><i>Alivin-2</i></b> | <b>1 : 109761489-109764346</b> | <b>9 : 2934618-2936132</b>                                    |
| -                                                             | GNAI3                  | 1 : 109803343-109849017        | 9 : 2907966-2918306                                           |
| 11 : 5954943-5956340                                          | <b><i>GPR61</i></b>    | <b>1 : 109794551-109800497</b> | <b>9 : 2921704-2922744</b>                                    |
| 11 : 5966635-5971303                                          | AMPD2                  | 1 : 109874501-109886798        | -                                                             |
| -                                                             | ATXN7L2                | 1 : 109738603-109747396        | 9 : 2939359-2942203                                           |
| -                                                             | Sypl2                  | 1 : 109721142-109734212        | 9 : 2942523-2945526                                           |
| -                                                             | SORT1                  | 1 : 109568465-109652615        | 9 : 2947941-2955504                                           |
| 11 : 5973422-5977119                                          | EPS8L3                 | 1 : 110004744-110018606        | -                                                             |
| 11 : 5978240-5980600                                          | IRF6                   | 1 : 206349657-206367874        | -                                                             |
