# Supplementary material for: GPCR Genes Are Preferentially Retained after Whole Genome Duplication
Source: PubMed Central journal article supplement (PMC2270905; doi:10.1371/journal.pone.0001903), 2008-04-02
Supplement: pone.0001903.s006.pdf [file pone.0001903.s006.pdf]

**Table S4 A. List of the open reading frame (ORF) lengths of representative human receptors in each of the 269 nGPCR families.**

| Receptor class | Representative human GPCR | Human gene ID | ORF length (amino acids) | Origin of pufferfish homologs |
|----------------|---------------------------|---------------|--------------------------|-------------------------------|
| A1             | GPR26                     | 2849          | 337                      | WGD                           |
| A1             | GPR61                     | 83873         | 451                      | WGD                           |
| A1             | OPN3                      | 23596         | 403                      | WGD                           |
| A1             | OPN4                      | 94233         | 478                      | WGD                           |
| A1             | RE2                       | 23432         | 529                      | WGD                           |
| A1             | RGR                       | 5995          | 295                      | WGD                           |
| A1             | OPN5                      | 221391        | 354                      | TD                            |
| A1             | GPR101                    | 83550         | 508                      | TD                            |
| A1             | GPR78                     | 27201         | 363                      | UD                            |
| A1             | GPR62                     | 118442        | 368                      | TD                            |
| A1             | MTNR1A                    | 4543          | 350                      | UD                            |
| A1             | RHO                       | 6010          | 348                      | WGD/TD                        |
| A1             | GPR135                    | 64582         | 494                      | S                             |
| A1             | GPR50                     | 9248          | 613                      | S                             |
| A1             | GPR84                     | 53831         | 396                      | S                             |
| A1             | MTNR1B                    | 4544          | 362                      | S                             |
| A1             | OPN1LW                    | 5956          | 364                      | S                             |
| A1             | OPN1SW                    | 611           | 348                      | S                             |
| A1             | RRH                       | 10692         | 337                      | S                             |
| A2             | ADRA1B                    | 147           | 520                      | WGD                           |
| A2             | ADRA2A                    | 150           | 450                      | WGD                           |
| A2             | CHRM2                     | 1129          | 466                      | WGD                           |
| A2             | CHRM4                     | 1132          | 478                      | WGD                           |
| A2             | DRD1                      | 1812          | 446                      | WGD                           |
| A2             | GPR21                     | 2844          | 349                      | WGD                           |
| A2             | HRH2                      | 3274          | 359                      | WGD                           |
| A2             | HRH4                      | 59340         | 445                      | WGD                           |
| A2             | HTR2B                     | 3357          | 481                      | TD                            |
| A2             | ADORA2A                   | 135           | 412                      | UD                            |
| A2             | ADORA2B                   | 136           | 332                      | UD                            |
| A2             | ADRA2C                    | 152           | 461                      | UD                            |
| A2             | ADRB1                     | 153           | 477                      | UD                            |
| A2             | CHRM3                     | 1131          | 590                      | UD                            |
| A2             | DRD2                      | 1813          | 443                      | UD                            |
| A2             | DRD4                      | 1815          | 467                      | UD                            |
| A2             | DRD5                      | 1816          | 477                      | UD                            |
| A2             | GPR22                     | 2845          | 433                      | UD                            |
| A2             | HTR1A                     | 3350          | 421                      | UD                            |
| A2             | HTR4                      | 3360          | 338                      | UD                            |
| A2             | HTR7                      | 3363          | 479                      | UD                            |
| A2             | TRAR1                     | 134864        | 339                      | UD                            |
| A2             | ADORA1                    | 134           | 326                      | WGD/TD                        |
| A2             | ADRA1A                    | 148           | 499                      | S                             |
| A2             | ADRA1D                    | 146           | 572                      | S                             |
| A2             | ADRA2B                    | 151           | 450                      | S                             |
| A2             | ADRB2                     | 154           | 413                      | S                             |
| A2             | CHRM1                     | 1128          | 460                      | S                             |
| A2             | CHRM5                     | 1133          | 532                      | S                             |
| A2             | DRD3                      | 1814          | 400                      | S                             |
| A2             | GPR119                    | 139760        | 335                      | S                             |
| A2             | GPR52                     | 9293          | 361                      | S                             |
| A2             | GPR58                     | 9287          | 306                      | S                             |
| A2             | GPR75                     | 10936         | 540                      | S                             |
| A2             | HRH1                      | 3269          | 487                      | S                             |
| A2             | HTR1B                     | 3351          | 390                      | S                             |
| A2             | HTR1D                     | 3352          | 377                      | S                             |
| A2             | HTR1F                     | 3355          | 365                      | S                             |
| A2             | HTR2C                     | 3358          | 471                      | S                             |
| A2             | HTR5B                     | 3361          | 357                      | S                             |

|    |                  |        |     |                              |
|----|------------------|--------|-----|------------------------------|
| A2 | HTR6             | 3362   | 440 | S                            |
| A2 | TRAR4            | 319100 | 345 | ND in <i>T. nigroviridis</i> |
| A3 | CNR1             | 1268   | 472 | WGD                          |
| A3 | EDG3             | 1903   | 378 | S                            |
| A3 | PTGER4           | 5734   | 488 | WGD                          |
| A3 | EDG5             | 9294   | 370 | TD                           |
| A3 | EDG2             | 1902   | 364 | UD                           |
| A3 | GPR12            | 2835   | 334 | UD                           |
| A3 | CNR2             | 1269   | 360 | S                            |
| A3 | EDG1             | 1901   | 381 | S                            |
| A3 | EDG7             | 23566  | 353 | S                            |
| A3 | EDG8             | 53637  | 398 | S                            |
| A3 | GPR6             | 2830   | 362 | S                            |
| A3 | MC1R             | 4157   | 317 | S                            |
| A3 | MC2R             | 4158   | 297 | S                            |
| A3 | MC4R             | 4160   | 332 | S                            |
| A3 | MC5R             | 4161   | 325 | S                            |
| A3 | PTGER2           | 5732   | 359 | S                            |
| A3 | PTGER3           | 5733   | 402 | S                            |
| A3 | PTGFR            | 5737   | 402 | S                            |
| A3 | PTGIR            | 5739   | 386 | S                            |
| A3 | TBXA2R           | 6915   | 343 | S                            |
| A3 | EDG4             | 9170   | 351 | ND in <i>T. nigroviridis</i> |
| A4 | EBI2             | 1880   | 361 | WGD                          |
| A4 | GPR20            | 2843   | 358 | WGD                          |
| A4 | GPR23            | 2846   | 370 | S                            |
| A4 | P2RY2            | 5029   | 377 | WGD                          |
| A4 | P2Y5             | 10161  | 344 | WGD                          |
| A4 | GPR4             | 2828   | 380 | TD                           |
| A4 | F2RL1            | 2150   | 397 | UD                           |
| A4 | F2RL2            | 2151   | 374 | UD                           |
| A4 | GPR109A          | 338442 | 363 | UD                           |
| A4 | GPR17            | 2840   | 367 | UD                           |
| A4 | GPR43            | 2867   | 300 | UD                           |
| A4 | P2RY1            | 5028   | 373 | UD                           |
| A4 | ADMR             | 11318  | 404 | S                            |
| A4 | F2R              | 2149   | 425 | S                            |
| A4 | F2RL3            | 9002   | 385 | S                            |
| A4 | GPR105           | 9934   | 338 | S                            |
| A4 | GPR141           | 353345 | 305 | S                            |
| A4 | GPR174           | 84636  | 333 | S                            |
| A4 | GPR18            | 2841   | 331 | S                            |
| A4 | GPR34            | 2857   | 305 | S                            |
| A4 | GPR41            | 2865   | 346 | S                            |
| A4 | GPR65            | 8477   | 337 | S                            |
| A4 | GPR68            | 8111   | 365 | S                            |
| A4 | GPR80            | 27199  | 337 | S                            |
| A4 | GPR86            | 53829  | 333 | S                            |
| A4 | GPR91            | 56670  | 330 | S                            |
| A4 | P2RY11           | 5032   | 374 | S                            |
| A4 | P2RY12           | 64805  | 319 | S                            |
| A4 | P2RY4            | 5030   | 365 | S                            |
| A4 | P2RY6            | 5031   | 328 | S                            |
| A4 | PTAFR            | 5724   | 342 | S                            |
| A4 | RDC1             | 57007  | 362 | S                            |
| A4 | CYSLTR1          | 10800  | 337 | ND in <i>T. nigroviridis</i> |
| A4 | P2RY8            | 286530 | 359 | ND in <i>T. nigroviridis</i> |
| A5 | EDNRB            | 1910   | 442 | WGD                          |
| A5 | GNRHR2-(partial) | 114814 | 292 | S                            |
| A5 | GPR74            | 10886  | 522 | WGD                          |
| A5 | GRPR             | 2925   | 399 | WGD                          |
| A5 | AVPR2            | 554    | 371 | TD                           |
| A5 | GPR103           | 84109  | 431 | TD                           |
| A5 | OXTR             | 5021   | 389 | TD                           |
| A5 | TACR3            | 6870   | 398 | TD                           |
| A5 | AVPR1A           | 552    | 418 | UD                           |
| A5 | EDNRA            | 1909   | 427 | UD                           |

|    |        |        |     |     |
|----|--------|--------|-----|-----|
| A5 | GPR10  | 2834   | 370 | UD  |
| A5 | GPR173 | 54328  | 373 | UD  |
| A5 | LHCGR  | 3973   | 699 | UD  |
| A5 | NMBR   | 4829   | 390 | UD  |
| A5 | NPY2R  | 4887   | 381 | UD  |
| A5 | NPY5R  | 4889   | 384 | UD  |
| A5 | TACR1  | 6869   | 407 | UD  |
| A5 | AVPR1B | 553    | 424 | S   |
| A5 | CCKAR  | 886    | 428 | S   |
| A5 | FSHR   | 2492   | 695 | S   |
| A5 | GPR    | 11245  | 515 | S   |
| A5 | GPR19  | 2842   | 415 | S   |
| A5 | GPR37  | 2861   | 613 | S   |
| A5 | GPR37L | 9283   | 481 | S   |
| A5 | GPR45  | 11250  | 376 | S   |
| A5 | GPR63  | 81491  | 419 | S   |
| A5 | GPR73  | 10887  | 393 | S   |
| A5 | GPR83  | 10888  | 423 | S   |
| A5 | GPR85  | 54329  | 370 | S   |
| A5 | HCRTR2 | 3062   | 425 | S   |
| A5 | LGR4   | 55366  | 951 | S   |
| A5 | LGR5   | 8549   | 907 | S   |
| A5 | LGR6   | 59352  | 828 | S   |
| A5 | LGR7   | 59350  | 757 | S   |
| A5 | LGR8   | 122042 | 754 | S   |
| A5 | NPFFR1 | 64106  | 430 | S   |
| A5 | PPYR1  | 5540   | 375 | S   |
| A5 | TSHR   | 7253   | 764 | S   |
| A6 | NMUR1  | 10316  | 426 | S   |
| A6 | TRHR   | 7201   | 398 | UD  |
| A6 | GHSR   | 2693   | 366 | S   |
| A6 | GPR38  | 2862   | 412 | S   |
| A6 | GPR39  | 2863   | 453 | S   |
| A6 | NMUR2  | 56923  | 415 | S   |
| A6 | NTSR1  | 4923   | 418 | S   |
| A7 | CXCR4  | 7852   | 352 | WGD |
| A7 | GPR151 | 134391 | 419 | WGD |
| A7 | RLN3R1 | 51289  | 469 | WGD |
| A7 | AGTRL1 | 187    | 380 | UD  |
| A7 | BLR1   | 643    | 372 | UD  |
| A7 | CCR9   | 10803  | 369 | UD  |
| A7 | CMKLR1 | 1240   | 371 | UD  |
| A7 | GALR1  | 2587   | 349 | UD  |
| A7 | GPR14  | 2837   | 389 | UD  |
| A7 | LTB4R  | 1241   | 352 | UD  |
| A7 | OPRK1  | 4986   | 380 | UD  |
| A7 | SSTR2  | 6752   | 369 | UD  |
| A7 | SSTR3  | 6753   | 418 | UD  |
| A7 | AGTR1  | 185    | 359 | S   |
| A7 | AGTR2  | 186    | 363 | S   |
| A7 | BDKRB2 | 624    | 391 | S   |
| A7 | C5R1   | 728    | 482 | S   |
| A7 | CCR5   | 1234   | 384 | S   |
| A7 | CCR6   | 1235   | 374 | S   |
| A7 | CCR7   | 1236   | 374 | S   |
| A7 | CCR10  | 2826   | 362 | S   |
| A7 | CCR11  | 51554  | 350 | S   |
| A7 | CX3CR1 | 1524   | 355 | S   |
| A7 | CXCR3  | 2833   | 368 | S   |
| A7 | FPR1   | 2357   | 350 | S   |
| A7 | GALR2  | 8811   | 387 | S   |
| A7 | GPR139 | 124274 | 661 | S   |
| A7 | GPR142 | 350383 | 469 | S   |
| A7 | GPR145 | 2847   | 422 | S   |
| A7 | GPR146 | 115330 | 333 | S   |
| A7 | GPR24  | 84539  | 340 | S   |
| A7 | GPR25  | 2848   | 360 | S   |

|    |           |        |      |                              |
|----|-----------|--------|------|------------------------------|
| A7 | GPR30     | 2852   | 375  | S                            |
| A7 | GPR44     | 11251  | 395  | S                            |
| A7 | GPR54     | 84634  | 398  | S                            |
| A7 | GPR8      | 2832   | 328  | S                            |
| A7 | IL8RA     | 3577   | 350  | S                            |
| A7 | IL8RB     | 3579   | 360  | S                            |
| A7 | OPRD1     | 4985   | 372  | S                            |
| A7 | OPRL1     | 4987   | 370  | S                            |
| A7 | OPRM1     | 4988   | 400  | S                            |
| A7 | SSTR5     | 6755   | 364  | S                            |
| A7 | GPR1      | 2825   | 355  | ND in <i>T. nigroviridis</i> |
| A7 | SSTR1     | 6751   | 391  | ND in <i>T. nigroviridis</i> |
| A7 | XCR1      | 2829   | 333  | UD                           |
| A7 | RLN3R2    | 339403 | 374  | WGD/TD                       |
| B  | CLR       | 10203  | 461  | WGD                          |
| B  | GPR112    | 139378 | 2799 | WGD                          |
| B  | GPR64     | 10149  | 1014 | WGD                          |
| B  | LPHN2     | 23266  | 1403 | WGD                          |
| B  | VIPR1     | 7433   | 457  | WGD                          |
| B  | BAI3      | 577    | 1522 | TD                           |
| B  | ADCYAP1R1 | 117    | 525  | UD                           |
| B  | BAI1      | 575    | 1584 | UD                           |
| B  | CR        | 799    | 474  | UD                           |
| B  | GCGR      | 2642   | 477  | UD                           |
| B  | LPHN1     | 22859  | 1474 | UD                           |
| B  | LPHN3     | 23284  | 1240 | UD                           |
| B  | PTHR1     | 5745   | 593  | UD                           |
| B  | VIPR2     | 7434   | 438  | UD                           |
| B  | BAI2      | 576    | 1572 | S                            |
| B  | CD97      | 976    | 835  | S                            |
| B  | CELSR1    | 9620   | 3014 | S                            |
| B  | CELSR2    | 1952   | 2923 | S                            |
| B  | CELSR3    | 1951   | 3312 | S                            |
| B  | CRHR1     | 1394   | 415  | S                            |
| B  | ELTD1     | 64123  | 606  | S                            |
| B  | EMR1      | 2015   | 886  | S                            |
| B  | GHRHR     | 2692   | 423  | S                            |
| B  | GLP1R     | 2740   | 463  | S                            |
| B  | GLP2R     | 9340   | 553  | S                            |
| B  | GPR114    | 221188 | 528  | S                            |
| B  | GPR116    | 221395 | 915  | S                            |
| B  | GPR123    | 84435  | 1280 | S                            |
| B  | GPR124    | 25960  | 1331 | S                            |
| B  | GPR125    | 166647 | 1124 | S                            |
| B  | GPR126    | 57211  | 404  | S                            |
| B  | GPR144    | 347088 | 332  | S                            |
| B  | GPR56     | 9289   | 693  | S                            |
| B  | PTHR2     | 5746   | 550  | S                            |
| B  | VLGR1     | 84059  | 6307 | S                            |
| B  | CRHR2     | 1395   | 411  | ND in <i>T. nigroviridis</i> |
| B  | GPR133    | 283383 | 633  | ND in <i>T. nigroviridis</i> |
| B  | GPR97     | 222487 | 549  | ND in <i>T. nigroviridis</i> |
| C  | GPRC5B    | 51704  | 357  | WGD                          |
| C  | GPRC5C    | 55890  | 453  | WGD                          |
| C  | GRM1      | 2911   | 1194 | WGD                          |
| C  | GRM7      | 2917   | 915  | WGD                          |
| C  | GRM2      | 2912   | 872  | TD                           |
| C  | GRM8      | 2918   | 908  | UD                           |
| C  | CASR      | 846    | 1078 | S                            |
| C  | GABBR1    | 2550   | 961  | S                            |
| C  | GPR51     | 9568   | 941  | S                            |
| C  | GRM3      | 2913   | 877  | S                            |
| C  | GRM4      | 2914   | 912  | S                            |
| C  | GRM5      | 2915   | 1180 | S                            |
| C  | GRM6      | 2916   | 877  | S                            |
| C  | GPRC6A    | 222545 | 926  | ND in <i>T. nigroviridis</i> |
| F  | FZD7      | 8324   | 574  | WGD                          |

|   |       |       |     |    |
|---|-------|-------|-----|----|
| F | FZD3  | 7976  | 666 | UD |
| F | FZD8  | 8325  | 694 | UD |
| F | FZD10 | 11211 | 581 | S  |
| F | FZD4  | 8322  | 537 | S  |
| F | FZD5  | 7855  | 585 | S  |
| F | FZD6  | 8323  | 706 | S  |
| F | FZD9  | 8326  | 591 | S  |
| F | SMO   | 6608  | 787 | S  |
| F | FZD1  | 8321  | 648 | S  |

**Table S4 B. List of MWs of cognate ligands for each of the 190 families of nGPCRs with a known ligand(s).**

| Receptor class | Representative human GPCR | Human gene ID | Origin of pufferfish homologs | Chemical properties of ligands | Representative ligand | Ligand size Log <sub>10</sub> (MW) |
|----------------|---------------------------|---------------|-------------------------------|--------------------------------|-----------------------|------------------------------------|
| A1             | MTNR1A                    | 4543          | UD                            | amine                          | Melatonin             | 2.37                               |
| A1             | MTNR1B                    | 4544          | S                             | amine                          | Melatonin             | 2.37                               |
| A1             | OPN1LW                    | 5956          | S                             | photon                         | photon                | 0.00                               |
| A1             | OPN1SW                    | 611           | S                             | photon                         | photon                | 0.00                               |
| A1             | OPN3                      | 23596         | WGD                           | photon                         | photon                | 0.00                               |
| A1             | OPN4                      | 94233         | WGD                           | photon                         | photon                | 0.00                               |
| A1             | OPN5                      | 221391        | TD                            | photon                         | photon                | 0.00                               |
| A1             | RGR                       | 5995          | WGD                           | photon                         | photon                | 0.00                               |
| A1             | RHO                       | 6010          | WGD                           | photon                         | photon                | 0.00                               |
| A1             | RRH                       | 10692         | S                             | photon                         | photon                | 0.00                               |
| A2             | ADORA1                    | 134           | WGD                           | nucleotide                     | Adenosine             | 2.43                               |
| A2             | ADORA2A                   | 135           | UD                            | nucleotide                     | Adenosine             | 2.43                               |
| A2             | ADORA2B                   | 136           | UD                            | nucleotide                     | Adenosine             | 2.43                               |
| A2             | ADRA1A                    | 148           | S                             | amine                          | Noradrenaline         | 2.23                               |
| A2             | ADRA1B                    | 147           | WGD                           | amine                          | Adrenaline            | 2.26                               |
| A2             | ADRA1D                    | 146           | S                             | amine                          | Adrenaline            | 2.26                               |
| A2             | ADRA2A                    | 150           | WGD                           | amine                          | Adrenaline            | 2.26                               |
| A2             | ADRA2B                    | 151           | S                             | amine                          | Adrenaline            | 2.26                               |
| A2             | ADRA2C                    | 152           | UD                            | amine                          | Adrenaline            | 2.26                               |
| A2             | ADRB1                     | 153           | UD                            | amine                          | Noradrenaline         | 2.23                               |
| A2             | ADRB2                     | 154           | S                             | amine                          | Adrenaline            | 2.26                               |
| A2             | CHRM1                     | 1128          | S                             | amine                          | Acetylcholine         | 2.16                               |
| A2             | CHRM2                     | 1129          | WGD                           | amine                          | Acetylcholine         | 2.16                               |
| A2             | CHRM3                     | 1131          | UD                            | amine                          | Acetylcholine         | 2.16                               |
| A2             | CHRM4                     | 1132          | WGD                           | amine                          | Acetylcholine         | 2.16                               |
| A2             | CHRM5                     | 1133          | S                             | amine                          | Acetylcholine         | 2.16                               |
| A2             | DRD1                      | 1812          | WGD                           | amine                          | Dopamine              | 2.19                               |
| A2             | DRD2                      | 1813          | UD                            | amine                          | Dopamine              | 2.19                               |
| A2             | DRD3                      | 1814          | S                             | amine                          | Dopamine              | 2.19                               |

|    |        |        |     |                     |                                |      |
|----|--------|--------|-----|---------------------|--------------------------------|------|
| A2 | DRD4   | 1815   | UD  | amine               | Dopamine                       | 2.19 |
| A2 | DRD5   | 1816   | UD  | amine               | Dopamine                       | 2.19 |
| A2 | HRH1   | 3269   | S   | amine               | Histamine                      | 2.05 |
| A2 | HRH2   | 3274   | WGD | amine               | Histamine                      | 2.05 |
| A2 | HRH4   | 59340  | WGD | amine               | Histamine                      | 2.05 |
| A2 | HTR1A  | 3350   | UD  | amine               | 5-Hydroxytryptamine            | 2.25 |
| A2 | HTR1B  | 3351   | S   | amine               | 5-Hydroxytryptamine            | 2.25 |
| A2 | HTR1D  | 3352   | S   | amine               | 5-Hydroxytryptamine            | 2.25 |
| A2 | HTR1F  | 3355   | S   | amine               | 5-Hydroxytryptamine            | 2.25 |
| A2 | HTR2B  | 3357   | TD  | amine               | 5-Hydroxytryptamine            | 2.25 |
| A2 | HTR2C  | 3358   | S   | amine               | 5-Hydroxytryptamine            | 2.25 |
| A2 | HTR5B  | 3361   | S   | amine               | 5-Hydroxytryptamine            | 2.25 |
| A2 | HTR6   | 3362   | S   | amine               | 5-Hydroxytryptamine            | 2.25 |
| A2 | HTR7   | 3363   | UD  | amine               | 5-Hydroxytryptamine            | 2.25 |
| A2 | TRAR1  | 134864 | UD  | amine               | Phenylethylamine, tyramine     | 2.08 |
| A3 | CNR1   | 1268   | WGD | lipophylic molecule | Cannabinoid                    | 2.50 |
| A3 | CNR2   | 1269   | S   | lipophylic molecule | Cannabinoid                    | 2.50 |
| A3 | EDG1   | 1901   | S   | lipophylic molecule | Sphingosine 1-phosphate        | 2.58 |
| A3 | EDG2   | 1902   | UD  | lipophylic molecule | Lysophosphatidic acid          | 2.64 |
| A3 | EDG3   | 1903   | S   | lipophylic molecule | Sphingosine 1-phosphate        | 2.58 |
| A3 | EDG4   | 9170   | ND  | lipophylic molecule | Lysophosphatidic acid          | 2.64 |
| A3 | EDG5   | 9294   | TD  | lipophylic molecule | Sphingosine 1-phosphate        | 2.58 |
| A3 | EDG7   | 23566  | S   | lipophylic molecule | Lysophosphatidic acid          | 2.64 |
| A3 | EDG8   | 53637  | S   | lipophylic molecule | Sphingosine 1-phosphate        | 2.58 |
| A3 | GPR12  | 2835   | UD  | lipophylic molecule | Sphingosine 1-phosphate        | 2.58 |
| A3 | GPR6   | 2830   | S   | lipophylic molecule | Sphingosine 1-phosphate        | 2.58 |
| A3 | MC1R   | 4157   | S   | peptide             | Melanocyte stimulating hormone | 3.42 |
| A3 | MC2R   | 4158   | S   | peptide             | Adrenocorticotropic hormone    | 3.42 |
| A3 | MC4R   | 4160   | S   | peptide             | Melanocyte stimulating hormone | 3.42 |
| A3 | MC5R   | 4161   | S   | peptide             | Melanocyte stimulating hormone | 3.42 |
| A3 | PTGER2 | 5732   | S   | lipophylic molecule | Prostaglandin D2               | 2.55 |
| A3 | PTGER3 | 5733   | S   | lipophylic molecule | Prostaglandin E2               | 2.55 |
| A3 | PTGER4 | 5734   | WGD | lipophylic molecule | Prostaglandin E2               | 2.55 |
| A3 | PTGFR  | 5737   | S   | lipophylic molecule | Prostaglandin E2               | 2.55 |

|    |         |        |     |                     |                                 |      |
|----|---------|--------|-----|---------------------|---------------------------------|------|
| A3 | PTGIR   | 5739   | S   | lipophylic molecule | Prostacyclin                    | 2.55 |
| A3 | TBXA2R  | 6915   | S   | lipophylic molecule | Thromboxane A2                  | 2.55 |
| A4 | CYSLTR1 | 10800  | ND  | lipophylic molecule | Leukotriene D4                  | 2.70 |
| A4 | F2R     | 2149   | S   | peptide             | Thrombin                        | 3.63 |
| A4 | F2RL1   | 2150   | UD  | peptide             | Serine proteases                | 3.63 |
| A4 | F2RL2   | 2151   | UD  | peptide             | Thrombin                        | 3.63 |
| A4 | F2RL3   | 9002   | S   | peptide             | Serine proteases                | 3.63 |
| A4 | GPR105  | 9934   | S   | nucleotide          | UDP-Glucose                     | 2.75 |
| A4 | GPR109A | 338442 | UD  | amine               | Nicotinic acid (high affinity)  | 2.09 |
| A4 | GPR23   | 2846   | S   | lipophylic molecule | Lysophosphatidic acid           | 2.64 |
| A4 | GPR41   | 2865   | S   | lipophylic molecule | Carboxylic acids                | 2.16 |
| A4 | GPR43   | 2867   | UD  | lipophylic molecule | Long chain carboxylic acids     | 2.58 |
| A4 | GPR80   | 27199  | S   | lipophylic molecule | Ketoglutarate                   | 2.16 |
| A4 | GPR86   | 53829  | S   | nucleotide          | ADP                             | 2.63 |
| A4 | GPR91   | 56670  | S   | lipophylic molecule | Succinate                       | 2.07 |
| A4 | P2RY1   | 5028   | UD  | nucleotide          | ADP                             | 2.63 |
| A4 | P2RY11  | 5032   | S   | nucleotide          | ATP                             | 2.71 |
| A4 | P2RY2   | 5029   | WGD | nucleotide          | UTP, ATP                        | 2.71 |
| A4 | P2RY4   | 5030   | S   | nucleotide          | UTP                             | 2.68 |
| A4 | P2RY6   | 5031   | S   | nucleotide          | UDP                             | 2.61 |
| A4 | PTAFR   | 5724   | S   | lipophylic molecule | Platelet-activating factor      | 2.72 |
| A5 | AVPR1A  | 552    | UD  | peptide             | Vasopressin                     | 3.04 |
| A5 | AVPR1B  | 553    | S   | peptide             | Vasopressin                     | 3.04 |
| A5 | AVPR2   | 554    | TD  | peptide             | Vasopressin                     | 3.04 |
| A5 | CCKAR   | 886    | S   | peptide             | Cholecystokinin                 | 3.19 |
| A5 | EDNRA   | 1909   | UD  | peptide             | Endothelin 1, endothelin 2      | 3.63 |
| A5 | EDNRB   | 1910   | WGD | peptide             | Endothelins 1, 2 and 3          | 3.63 |
| A5 | FSHR    | 2492   | S   | peptide             | Follicle-stimulating hormone    | 4.48 |
| A5 | GNRHR2  | 114814 | S   | peptide             | Gonadotrophin-releasing hormone | 3.04 |
| A5 | GPR10   | 2834   | UD  | peptide             | Prolactin-releasing peptide     | 3.36 |
| A5 | GPR103  | 84109  | TD  | peptide             | RF-Amide P518 gene product      | 3.40 |
| A5 | GPR73   | 10887  | S   | peptide             | Prokineticins 1 and 2           | 3.56 |
| A5 | GPR74   | 10886  | WGD | peptide             | Neuropeptide FF                 | 3.16 |
| A5 | HCRTR2  | 3062   | S   | peptide             | Orexin A, orexin B              | 3.57 |



|    |        |        |     |         |                               |      |
|----|--------|--------|-----|---------|-------------------------------|------|
| A5 | LGR7   | 59350  | S   | peptide | Relaxin                       | 3.78 |
| A5 | LGR8   | 122042 | S   | peptide | Relaxin                       | 3.78 |
| A5 | LHCGR  | 3973   | UD  | peptide | gonadotropin                  | 4.48 |
| A5 | NMBR   | 4829   | UD  | peptide | Neuromedin B                  | 3.56 |
| A5 | NPFFR1 | 64106  | S   | peptide | Neuropeptide FF               | 3.16 |
| A5 | NPY2R  | 4887   | UD  | peptide | Neuropeptide Y                | 3.62 |
| A5 | NPY5R  | 4889   | UD  | peptide | Neuropeptide Y                | 3.62 |
| A5 | OXTR   | 5021   | TD  | peptide | Oxytocin                      | 3.00 |
| A5 | PPYR1  | 5540   | S   | peptide | Pancreatic polypeptide        | 3.48 |
| A5 | TACR1  | 6869   | UD  | peptide | Substance P                   | 3.05 |
| A5 | TACR3  | 6870   | TD  | peptide | Neurokinin A                  | 3.05 |
| A5 | TSHR   | 7253   | S   | peptide | Thyroid-stimulating hormone   | 4.48 |
| A5 | GRPR   | 2925   | WGD | peptide | Gastrin-releasing peptide     | 3.46 |
| A6 | GHSR   | 2693   | S   | peptide | Ghrelin                       | 3.51 |
| A6 | GPR38  | 2862   | S   | peptide | Motilin                       | 3.43 |
| A6 | NMUR1  | 10316  | S   | peptide | NMU, NMS                      | 3.59 |
| A6 | NMUR2  | 56923  | S   | peptide | NMU, NMS                      | 3.59 |
| A6 | NTSR1  | 4923   | S   | peptide | Neurotensin                   | 3.19 |
| A6 | TRHR   | 7201   | UD  | peptide | Thyrotropin-releasing hormone | 2.58 |
| A7 | AGTR1  | 185    | S   | peptide | Angiotensin                   | 3.11 |
| A7 | AGTR2  | 186    | S   | peptide | Angiotensin                   | 3.11 |
| A7 | AGTRL1 | 187    | UD  | peptide | Apelin                        | 3.52 |
| A7 | BDKRB2 | 624    | S   | peptide | Bradykinin                    | 3.03 |
| A7 | BLR1   | 643    | UD  | peptide | CXCL13                        | 4.02 |
| A7 | C5R1   | 728    | S   | peptide | Anaphylatoxin C3a             | 3.90 |
| A7 | CCR10  | 2826   | S   | peptide | CCL27, CCL28                  | 4.02 |
| A7 | CCR5   | 1234   | S   | peptide | CCR3,4,5,8,14                 | 4.02 |
| A7 | CCR6   | 1235   | S   | peptide | CCL20                         | 4.02 |
| A7 | CCR7   | 1236   | S   | peptide | CCL2, CCL7, CCL8, CCL13       | 4.02 |
| A7 | CCR9   | 10803  | UD  | peptide | CCL25                         | 4.02 |
| A7 | CMKLR1 | 1240   | UD  | peptide | RARRES2                       | 4.18 |
| A7 | CX3CR1 | 1524   | S   | peptide | CX3CL1                        | 4.02 |
| A7 | CXCR3  | 2833   | S   | peptide | CXCL9,10,11,12                | 4.02 |
| A7 | CXCR4  | 7852   | WGD | peptide | CXCL12                        | 4.02 |

|    |           |        |     |                     |                                   |      |
|----|-----------|--------|-----|---------------------|-----------------------------------|------|
| A7 | FPR1      | 2357   | S   | peptide             | N-Formyl-L-Met-L-Leu-L-Phe (fMLP) | 2.60 |
| A7 | GALR1     | 2587   | UD  | peptide             | Galanin                           | 3.50 |
| A7 | GALR2     | 8811   | S   | peptide             | Galanin                           | 3.50 |
| A7 | GPR14     | 2837   | UD  | peptide             | Urotensin II                      | 3.14 |
| A7 | GPR145    | 2847   | S   | peptide             | Melanin-concentrating hormone     | 3.38 |
| A7 | GPR24     | 84539  | S   | peptide             | Melanin-concentrating hormone     | 3.38 |
| A7 | GPR30     | 2852   | S   | lipophylic molecule | progesterone                      | 2.50 |
| A7 | GPR44     | 11251  | S   | lipophylic molecule | 11-Dehydrothromboxane B2          | 2.56 |
| A7 | GPR54     | 84634  | S   | peptide             | KiSS-1 gene product               | 3.77 |
| A7 | GPR8      | 2832   | S   | peptide             | Neuropeptide W, neuropeptide B    | 3.49 |
| A7 | IL8RA     | 3577   | S   | peptide             | CXCL8                             | 4.02 |
| A7 | IL8RB     | 3579   | S   | peptide             | CXCL1—3, CXCL5—8                  | 4.02 |
| A7 | LTB4R     | 1241   | UD  | lipophylic molecule | Leukotriene B4                    | 2.53 |
| A7 | OPRD1     | 4985   | S   | peptide             | POMC-BETA-ENDORPHIN               | 3.26 |
| A7 | OPRK1     | 4986   | UD  | peptide             | Dynorphin A                       | 3.33 |
| A7 | OPRL1     | 4987   | S   | peptide             | Nociceptin/orphanin FQ            | 3.26 |
| A7 | OPRM1     | 4988   | S   | peptide             | Endorphin                         | 3.04 |
| A7 | RLN3R1    | 51289  | WGD | peptide             | Relaxin-3                         | 3.78 |
| A7 | SSTR1     | 6751   | ND  | peptide             | Somatostatin                      | 3.21 |
| A7 | SSTR2     | 6752   | UD  | peptide             | Somatostatin                      | 3.21 |
| A7 | SSTR3     | 6753   | UD  | peptide             | Somatostatin                      | 3.21 |
| A7 | SSTR5     | 6755   | S   | peptide             | Somatostatin                      | 3.21 |
| A7 | RLN3R2    | 339403 | WGD | peptide             | RLN3, INSL5                       | 3.78 |
| A7 | XCR1      | 2829   | UD  | peptide             | XCL1, CXCL2                       | 4.02 |
| B  | ADCYAP1R1 | 117    | UD  | peptide             | PACAP                             | 3.50 |
| B  | CR        | 799    | UD  | peptide             | Calcitonin, Amylin                | 3.54 |
| B  | CLR       | 10203  | WGD | peptide             | CGRP, adrenomedullin, intermedin  | 3.78 |
| B  | CRHR1     | 1394   | S   | peptide             | urocortins                        | 3.68 |
| B  | CRHR2     | 1395   | ND  | peptide             | Urocortins                        | 3.68 |
| B  | GCGR      | 2642   | UD  | peptide             | Glucagon                          | 3.58 |
| B  | GHRHR     | 2692   | S   | peptide             | GHRH                              | 3.71 |
| B  | GLP1R     | 2740   | S   | peptide             | Glucagon-like peptide 1           | 3.58 |
| B  | GLP2R     | 9340   | S   | peptide             | Glucagon-like peptide 2           | 3.58 |
| B  | PTH1R     | 5745   | UD  | peptide             | Parathyroid hormone               | 3.50 |

|   |        |        |     |         |                     |      |
|---|--------|--------|-----|---------|---------------------|------|
| B | PTHR2  | 5746   | S   | peptide | TIP-39              | 3.50 |
| B | VIPR1  | 7433   | WGD | peptide | VIP, PACAP          | 3.66 |
| B | VIPR2  | 7434   | UD  | peptide | VIP, PACAP          | 3.66 |
| C | CASR   | 846    | S   | ion     | Calcium             | 1.60 |
| C | GABBR1 | 2550   | S   | amine   | GABAa               | 2.45 |
| C | GPR51  | 9568   | S   | amine   | GABAa               | 2.45 |
| C | GPRC6A | 222545 | ND  | amine   | amino acids         | 2.04 |
| C | GRM1   | 2911   | WGD | amine   | L-glutamate         | 2.16 |
| C | GRM2   | 2912   | TD  | amine   | L-glutamate         | 2.16 |
| C | GRM3   | 2913   | S   | amine   | L-glutamate         | 2.16 |
| C | GRM4   | 2914   | S   | amine   | L-glutamate         | 2.16 |
| C | GRM5   | 2915   | S   | amine   | L-glutamate         | 2.16 |
| C | GRM6   | 2916   | S   | amine   | L-glutamate         | 2.16 |
| C | GRM7   | 2917   | WGD | amine   | L-glutamate         | 2.16 |
| C | GRM8   | 2918   | UD  | amine   | L-glutamate         | 2.16 |
| F | FZD1   | 8321   | S   | peptide | extent Wnt2         | 4.56 |
| F | FZD10  | 11211  | S   | peptide | Wnt                 | 4.56 |
| F | FZD3   | 7976   | UD  | peptide | Wnt                 | 4.56 |
| F | FZD4   | 8322   | S   | peptide | Wnt, Wnt5a, and NDP | 4.56 |
| F | FZD5   | 7855   | S   | peptide | Wnt and Wnt5a       | 4.56 |
| F | FZD6   | 8323   | S   | peptide | Wnt                 | 4.56 |
| F | FZD7   | 8324   | WGD | peptide | Wnt and Wnt5a       | 4.56 |
| F | FZD8   | 8325   | UD  | peptide | Wnt and Wnt1        | 4.56 |
| F | FZD9   | 8326   | S   | peptide | Wnt and Wnt2        | 4.56 |
| F | SMO    | 6608   | S   | peptide | Wnt                 | 4.56 |
