# Supplementary material for: GPCR Genes Are Preferentially Retained after Whole Genome Duplication
Source: PubMed Central journal article supplement (PMC2270905; doi:10.1371/journal.pone.0001903), 2008-04-02
Supplement: pone.0001903.s007.pdf [file pone.0001903.s007.pdf]

**Table S5 A. Inventory of polypeptide ligand genes in the MRCA of tetrapods and teleosts, human, and *T. nigroviridis*.** Based on syntenic mapping, the 118 *T.nigroviridis* ligand genes are sub-divided as WGD-derived (WGD), singleton (S), undetermined (UD), and teleost-specific (T).

| Receptor class | MRCA                                    |                     | Human                     | <i>Tetraodon nigroviridis</i> |     |    |    |    |                                                         |
|----------------|-----------------------------------------|---------------------|---------------------------|-------------------------------|-----|----|----|----|---------------------------------------------------------|
|                | No. of nGPCRs with a polypeptide ligand | No. of ligand genes | No. of human ligand genes | Total No. of ligand genes     | WGD | UD | S  | T  | Ortholog found in <i>D. rerio</i> or <i>T. rubripes</i> |
| A5             | 26                                      | 31                  | 37                        | 41                            | 8   | 8  | 23 | 2  | 0                                                       |
| A6             | 6                                       | 6                   | 6                         | 6                             | 0   | 0  | 6  | 0  | 0                                                       |
| A7             | 36                                      | 24                  | 57                        | 46                            | 4   | 19 | 14 | 8  | 1                                                       |
| B              | 13                                      | 15                  | 18                        | 25                            | 6   | 10 | 9  | 0  | 0                                                       |
| Total          | 81                                      | 76                  | 118                       | 118                           | 18  | 37 | 52 | 10 | 1                                                       |

**Table S5 B. List of polypeptide ligand genes in the MRCA of tetrapods and teleosts, and the derived ligand genes in human and *T. nigroviridis*.** Whole genome duplication (WGD); unknown duplication(UD); singleton(S).

| Ancestral count | Receptor Class | Ancestral ligand                                   | Human ligand gene ID | <i>T.nigroviridis</i>                            |                    |     |    |   |
|-----------------|----------------|----------------------------------------------------|----------------------|--------------------------------------------------|--------------------|-----|----|---|
|                 |                |                                                    |                      | Ligand gene identifier                           | Origin of homologs | WGD | UD | S |
| 1               | A5             | AVP - vasopressin                                  | 551                  | CAG09578                                         | S                  | 0   | 0  | 1 |
| 2               | A5             | OXT - oxytocin-neurophysin                         | 5020                 | CAG09583                                         | S                  | 0   | 0  | 1 |
| 3               | A5             | CCK - cholecystokinin                              | 885                  | CAF99479<br>CAG12884                             | WGD                | 1   | 0  | 0 |
|                 |                |                                                    |                      |                                                  |                    | 1   | 0  | 0 |
| 4               | A5             | CG $\alpha$ - glycoprotein hormones, alpha subunit | 1081                 | CAG10482                                         | S                  | 0   | 0  | 1 |
| 5               | A5             | EDN1 - endothelin 1                                | 1906                 | chrUn_md:105180240-344<br>chrUn_md:125929085-177 | UD                 | 0   | 1  | 0 |
|                 |                |                                                    |                      |                                                  |                    | 0   | 1  | 0 |
| 6               | A5             | EDN2 - endothelin 2                                | 1907                 | CAG06007                                         | S                  | 0   | 0  | 1 |
| 7               | A5             | EDN3 - endothelin 3                                | 1908                 | CAG07564                                         | S                  | 0   | 0  | 1 |
| 8               | A5             | FSH $\beta$ - follicle-stimulating hormone         | 2488                 | CAF99923                                         | S                  | 0   | 0  | 1 |
| 9               | A5             | GAST - gastrin                                     | 2520                 | BAC44896                                         | S                  | 0   | 0  | 1 |
| 10              | A5             | GNRH1 - gonadotrophin-releasing hormone 1          | 2796                 | BAE45689                                         | S                  | 0   | 0  | 1 |
| 11              | A5             | GNRH2 - gonadotrophin-releasing hormone 2          | 2797                 | BAE45691                                         | S                  | 0   | 0  | 1 |
| 12              | A5             | GPB $\beta$ 5 - glycoprotein hormone beta 5        | 122876               | CAG03758<br>CAG05739                             | UD                 | 0   | 1  | 0 |
|                 |                |                                                    |                      |                                                  |                    | 0   | 1  | 0 |
| 13              | A5             | GRP - gastrin-releasing peptide                    | 2922                 | chr4:3430570-1166                                | S                  | 0   | 0  | 1 |
| 14              | A5             | HCRT - orexin A and orexin B                       | 3060                 | CAG02825                                         | S                  | 0   | 0  | 1 |
| 15              | A5             | INSL5 - insulin-like 5                             | 10022                | chr1:15664564-5453<br>chr15:3444219-81           | WGD                | 1   | 0  | 0 |
|                 |                |                                                    |                      |                                                  |                    | 1   | 0  | 0 |
| 16              | A5             | RLN3 - relaxin 3, INSL3                            | 117579/3640          | CAG06046<br>chr3:8563693-833                     | WGD                | 1   | 0  | 0 |
|                 |                |                                                    |                      |                                                  |                    | 1   | 0  | 0 |
| 17              | A5             | RLN/RLN2/INSL4/INSL6                               | 6013/6019/3641/11172 | chr4:1081257-741                                 | S                  | 0   | 0  | 1 |
| 18              | A5             | LH $\beta$ - luteinizing hormone, $\beta$ subunit  | 3972                 | CAG00338                                         | S                  | 0   | 0  | 1 |
| 19              | A5             | NMB - neuromedin B                                 | 4828                 | chr5:2458757-852<br>chr13:2188886-963            | WGD                | 1   | 0  | 0 |
|                 |                |                                                    |                      |                                                  |                    | 1   | 0  | 0 |
| 20              | A5             | NPFF, NPAF                                         | 8620                 | CAG07075                                         | S                  | 0   | 0  | 1 |
| 21              | A5             | NPY - neuropeptide Y                               | 4852                 | CAG11987<br>CAG11107                             | UD                 | 0   | 1  | 0 |
|                 |                |                                                    |                      |                                                  |                    | 0   | 1  | 0 |
| 22              | A5             | PYY, PPY                                           | 5697/5539            | CAG02076<br>chr2:4330403-1166                    | UD                 | 0   | 1  | 0 |
|                 |                |                                                    |                      |                                                  |                    | 0   | 1  | 0 |
| 23              | A5             | P518 - RF-Amide P518                               | 347148               | GSCT00026421001                                  | S                  | 0   | 0  | 1 |
| 24              | A5             | PrRP - prolactin-releasing peptide                 | 51052                | chr6:1313515-86                                  | S                  | 0   | 0  | 1 |

| Ancestral count | Receptor Class | Ancestral ligand                                           | Human ligand gene ID | <i>T.nigroviridis</i>                            |                    |             |             |             |
|-----------------|----------------|------------------------------------------------------------|----------------------|--------------------------------------------------|--------------------|-------------|-------------|-------------|
|                 |                |                                                            |                      | Ligand gene identifier                           | Origin of homologs | WGD         | UD          | S           |
| 25              | A5             | <b>PROK1</b> - prokineticin 1 (EG-VEGF)                    | 84432                | CAG07489                                         | S                  | 0           | 0           | 1           |
| 26              | A5             | <b>PROK2</b> - prokineticin 2                              | 60675                | CAF96920                                         | S                  | 0           | 0           | 1           |
| 27              | A5             | <b>RFRP</b> - RFamide-related peptide                      | 64111                | CAF99426                                         | S                  | 0           | 0           | 1           |
| 28              | A5             | <b>TAC1</b> - substance P/tachykinin1                      | 6863                 | CAG11662                                         | S                  | 0           | 0           | 1           |
| 29              | A5             | <b>TAC3</b> - neurokinin B /tachykinin 3                   | 6866                 | CAG07431                                         | S                  | 0           | 0           | 1           |
| 30              | A5             | <b>TAC4</b> - tachykinin 4                                 | 255061               | CAG04412                                         | S                  | 0           | 0           | 1           |
| 31              | A5             | <b>TSH<math>\beta</math></b> - thyroid-stimulating hormone | 7252                 | CAG11806                                         | S                  | 0           | 0           | 1           |
| <b>Subtotal</b> |                |                                                            | <b>36</b>            |                                                  |                    | <b>8</b>    | <b>8</b>    | <b>23</b>   |
| 1               | A6             | <b>GHRL</b> - ghrelin                                      | 51738                | chr16:8282093-8282194                            | S                  | 0           | 0           | 1           |
| 2               | A6             | <b>MLN</b> - motilin                                       | 4295                 | chr11:774453-775188                              | S                  | 0           | 0           | 1           |
| 3               | A6             | <b>NMS</b> - neuromedin S                                  | 129521               | chr2:17978277-659                                | S                  | 0           | 0           | 1           |
| 4               | A6             | <b>NMU</b> - neuromedin U                                  | 10874                | chr1_rnd:2147854-9206                            | S                  | 0           | 0           | 1           |
| 5               | A6             | <b>NTS</b> - neuromedin N and neurotensin                  | 4922                 | chr13:11758087-185                               | S                  | 0           | 0           | 1           |
| 6               | A6             | <b>TRH</b> - thyrotropin-releasing hormone                 | 7200                 | CAG11330                                         | S                  | 0           | 0           | 1           |
| <b>Subtotal</b> |                |                                                            | <b>6</b>             |                                                  |                    | <b>0</b>    | <b>0</b>    | <b>6</b>    |
| 1               | A7             | <b>AGT</b> - angiotensin                                   | 183                  | CAG10094                                         | S                  | 0           | 0           | 1           |
| 2               | A7             | <b>APLN</b> - apelin                                       | 8862                 | CAG08364                                         | S                  | 0           | 0           | 1           |
| 3               | A7             | <b>CORT</b> - cortistatin                                  | 1325                 | CAG07556                                         | S                  | 0           | 0           | 1           |
| 4               | A7             | <b>GAL</b> - galanin                                       | 51083                | chrUn_rnd:85620427-1348                          | S                  | 0           | 0           | 1           |
| 5               | A7             | <b>KISS1</b>                                               | 3814                 | SCAF14526                                        | S                  | 0           | 0           | 1           |
| 6               | A7             | <b>KNG1</b> - bradykinin                                   | 3827                 | CAF96097                                         | S                  | 0           | 0           | 1           |
| 7               | A7             | <b>NPB</b> - neuropeptide B                                | 256933               | CAG00214<br>CAG06031                             | WGD                | 1<br>1      | 0<br>0      | 0<br>0      |
| 8               | A7             | <b>PDYN</b> - dynorphin A                                  | 5173                 | <i>D.rei</i>                                     | S                  | 0           | 0           | 1           |
| 9               | A7             | <b>PENK</b> - proenkephalin                                | 5179                 | CAG11635                                         | S                  | 0           | 0           | 1           |
| 10              | A7             | <b>POMC</b> - proopiomelanocortin                          | 5443                 | Un_rnd:112416896-112417622<br>14:4949877-4950632 | UD                 | 0<br>0      | 1<br>1      | 0<br>0      |
| 11              | A7             | <b>MCH</b> - melanin-concentrating hormone                 | 5367                 | CAF93560<br>chr19:990239-877                     | UD                 | 0<br>0      | 1<br>1      | 0<br>0      |
| 12              | A7             | <b>NOC</b> - nociceptin/orphanin FQ                        | 5368                 | CAG12991<br>CAG03094<br>chrUn_rnd:79082359-535   | UD                 | 0<br>0<br>0 | 1<br>1<br>1 | 0<br>0<br>0 |
| 13              | A7             | <b>SST</b> - somatostatin                                  | 6750                 | CAG07675<br>CAG02176                             | UD                 | 0<br>0      | 1<br>1      | 0<br>0      |
| 14              | A7             | <b>UTS2</b> - urotensin II                                 | 10911                | CAG04941                                         | S                  | 0           | 0           | 1           |
| 15              | A7             | <b>UTS2D</b> - urotensin related peptide                   | 257313               | chr9:8502656-967                                 | S                  | 0           | 0           | 1           |
| 16              | A7             | <b>CCL20</b>                                               | 6364                 | chr15:4409609-10309                              | S                  | 0           | 0           | 1           |

| Ancestral count                                           | Receptor Class | Ancestral ligand                                          | Human ligand gene ID | <i>T.nigroviridis</i>  |                    |          |           |           |
|-----------------------------------------------------------|----------------|-----------------------------------------------------------|----------------------|------------------------|--------------------|----------|-----------|-----------|
|                                                           |                |                                                           |                      | Ligand gene identifier | Origin of homologs | WGD      | UD        | S         |
| 17                                                        | A7             | CCL22                                                     | 6367                 | SCAF2108               | S                  | 0        | 0         | 1         |
| 18                                                        | A7             | CCL24                                                     | 6369                 | chr18:7004875-6283     | S                  | 0        | 0         | 1         |
| 19                                                        | A7             | CCL21/25                                                  | 6366/6370            | chr15:5048784-9029     | UD                 | 0        | 1         | 0         |
|                                                           |                |                                                           |                      | CAG07167               | WGD                | 1        | 0         | 0         |
|                                                           |                |                                                           |                      | CAG07971               | WGD                | 1        | 0         | 0         |
| 20                                                        | A7             | CCL27/28                                                  | 10850/56477          | chr15:5046891-5047156  | UD                 | 0        | 1         | 0         |
|                                                           |                |                                                           |                      | chr15:4114798-956      | UD                 | 0        | 1         | 0         |
|                                                           |                |                                                           |                      | CAF90799               | UD                 | 0        | 1         | 0         |
|                                                           |                |                                                           |                      | chr2:17691812-907      | UD                 | 0        | 1         | 0         |
|                                                           |                |                                                           |                      | CAG09577               | UD                 | 0        | 1         | 0         |
| 21                                                        | A7             | CXCL8                                                     | 3576                 | CAG11181               | UD                 | 0        | 1         | 0         |
|                                                           |                |                                                           |                      | CAF90539               | UD                 | 0        | 1         | 0         |
| 22                                                        | A7             | CXCL9/10/11                                               | 4283/3627/6373       | GSCT00006672001        | S                  | 0        | 0         | 1         |
| 23                                                        | A7             | CXCL12                                                    | 6387                 | CAG09382               | UD                 | 0        | 1         | 0         |
|                                                           |                |                                                           |                      | chr18:2280936-96670    | UD                 | 0        | 1         | 0         |
| 24                                                        | A7             | CXCL14                                                    | 9547                 | CAF90863               | S                  | 0        | 0         | 1         |
| <b>Subtotal</b>                                           |                |                                                           | <b>28</b>            |                        |                    | <b>4</b> | <b>19</b> | <b>15</b> |
| 1                                                         | B              | ADM - adrenomedullin                                      | 133                  | CAF99639               | WGD                | 1        | 0         | 0         |
|                                                           |                |                                                           |                      | CAG05606               | WGD                | 1        | 0         | 0         |
| 2                                                         | B              | IMD - intermedin                                          | 79924                | chr15:7151047-646      | UD                 | 0        | 1         | 0         |
|                                                           |                |                                                           |                      | chr13:3271568-697      | UD                 | 0        | 1         | 0         |
| 3                                                         | B              | CALCA, CALCB- calcitonin; calcitonin gene-related peptide | 796/797              | CAF99659               | WGD                | 1        | 0         | 0         |
|                                                           |                |                                                           |                      | chr5: 6718835-9962     | WGD                | 1        | 0         | 0         |
| 4                                                         | B              | IAPP - amylin                                             | 3375                 | chrUn_md:66411282-990  | UD                 | 0        | 1         | 0         |
|                                                           |                |                                                           |                      | CAF89835               | S                  | 0        | 0         | 1         |
| 5                                                         | B              | CRH - corticotropin releasing factor                      | 1392                 | chr6:2514921-5169      | S                  | 0        | 0         | 1         |
| 6                                                         | B              | GCG - glucagon, GLP1, GLP2                                | 2641                 | CAG04974               | WGD                | 1        | 0         | 0         |
|                                                           |                |                                                           |                      | CAG09338 (AA740-end)   | WGD                | 1        | 0         | 0         |
| 7                                                         | B              | GHRH - growth hormone-releasing hormone                   | 2691                 | CAF96902               | S                  | 0        | 0         | 1         |
| 8                                                         | B              | ADCYAP1 - adenylate cyclase activating polypeptide 1      | 116                  | CAG12289               | UD                 | 0        | 1         | 0         |
|                                                           |                |                                                           |                      | GSTENT00031777001      | UD                 | 0        | 1         | 0         |
|                                                           |                |                                                           |                      | CAG10213               | UD                 | 0        | 1         | 0         |
| 9                                                         | B              | PTH parathyroid hormone                                   | 5741                 | chrUn_md:153387022-120 | S                  | 0        | 0         | 1         |
| 10                                                        | B              | PTH LH - parathyroid hormone-like hormone                 | 5744                 | CAG08679               | UD                 | 0        | 1         | 0         |
|                                                           |                |                                                           |                      | CAF88940=CAF87848      | UD                 | 0        | 1         | 0         |
|                                                           |                |                                                           |                      | chrUn_md:12100351-452  | UD                 | 0        | 1         | 0         |
| 11                                                        | B              | TIP39                                                     | 113091               | CAG12455               | S                  | 0        | 0         | 1         |
| 12                                                        | B              | UCN - urocortin                                           | 7349                 | chr14:9250391-492      | S                  | 0        | 0         | 1         |
| 13                                                        | B              | UCN2 - urocortin 2                                        | 90226                | chr11:1019834-998      | S                  | 0        | 0         | 1         |
| 14                                                        | B              | UCN3 - urocortin 3                                        | 114131               | CAG07278               | S                  | 0        | 0         | 1         |
| 15                                                        | B              | VIP - vasoactive intestinal polypeptide                   | 7432                 | CAF97050               | S                  | 0        | 0         | 1         |
| <b>Subtotal</b>                                           |                |                                                           | <b>16</b>            |                        |                    | <b>6</b> | <b>10</b> | <b>9</b>  |
| <b>Ligand genes not present in <i>T. nigroviridis</i></b> |                |                                                           |                      |                        |                    |          |           |           |
| 1                                                         | A5             | NPS - neuropeptide S                                      | 594857               |                        |                    |          |           |           |

| Ancestral count | Receptor Class | Ancestral ligand                     | Human ligand gene ID | <i>T.nigroviridis</i>  |                    |     |    |   |
|-----------------|----------------|--------------------------------------|----------------------|------------------------|--------------------|-----|----|---|
|                 |                |                                      |                      | Ligand gene identifier | Origin of homologs | WGD | UD | S |
| 2               | A7             | GALP - galanin-like peptide          | 85569                |                        |                    |     |    |   |
| 3               | A7             | NPW - neuropeptide W                 | 283869               |                        |                    |     |    |   |
| 4               | A7             | CCL1                                 | 6346                 |                        |                    |     |    |   |
| 5               | A7             | CCL2                                 | 6347                 |                        |                    |     |    |   |
| 6               | A7             | CCL3                                 | 6348                 |                        |                    |     |    |   |
| 7               | A7             | CCL4                                 | 6351                 |                        |                    |     |    |   |
| 8               | A7             | CCL5                                 | 6352                 |                        |                    |     |    |   |
| 9               | A7             | CCL7                                 | 6354                 |                        |                    |     |    |   |
| 10              | A7             | CCL8                                 | 6355                 |                        |                    |     |    |   |
| 11              | A7             | CCL11                                | 6356                 |                        |                    |     |    |   |
| 12              | A7             | CCL13                                | 6357                 |                        |                    |     |    |   |
| 13              | A7             | CCL14                                | 6358                 |                        |                    |     |    |   |
| 14              | A7             | CCL15                                | 6359                 |                        |                    |     |    |   |
| 15              | A7             | CCL16                                | 6360                 |                        |                    |     |    |   |
| 16              | A7             | CCL17                                | 6361                 |                        |                    |     |    |   |
| 17              | A7             | CCL18                                | 6362                 |                        |                    |     |    |   |
| 18              | A7             | CCL19                                | 6363                 |                        |                    |     |    |   |
| 19              | A7             | CCL23                                | 6368                 |                        |                    |     |    |   |
| 20              | A7             | CCL26                                | 10344                |                        |                    |     |    |   |
| 21              | A7             | CXCL1                                | 2919                 |                        |                    |     |    |   |
| 22              | A7             | CXCL2                                | 2920                 |                        |                    |     |    |   |
| 23              | A7             | CXCL3                                | 2921                 |                        |                    |     |    |   |
| 24              | A7             | CXCL4=PF4V                           | 5197                 |                        |                    |     |    |   |
| 25              | A7             | CXCL5                                | 6374                 |                        |                    |     |    |   |
| 26              | A7             | CXCL6                                | 6372                 |                        |                    |     |    |   |
| 27              | A7             | CXCL7=PPBP                           | 5473                 |                        |                    |     |    |   |
| 28              | A7             | CXCL13                               | 10563                |                        |                    |     |    |   |
| 29              | A7             | CXCL15                               | 337989               |                        |                    |     |    |   |
| 30              | A7             | CXCL16                               | 58191                |                        |                    |     |    |   |
| 31              | B              | SCT - secretin                       | 6343                 |                        |                    |     |    |   |
| 32              | B              | GIP - gastric inhibitory polypeptide | 2695                 |                        |                    |     |    |   |

**Teleost-specific genes**

|   |    |           |         |                        |  |  |  |  |
|---|----|-----------|---------|------------------------|--|--|--|--|
| 1 | A5 | EDN-like  | 1000001 | chr8:5583520-870       |  |  |  |  |
| 2 | A5 | GNRH-like | 1000002 | BAE45693               |  |  |  |  |
| 1 | A7 | CCL-like  | 1000003 | CAG07793               |  |  |  |  |
| 2 |    |           |         | CAG07792               |  |  |  |  |
| 3 |    |           |         | chr2:17775947-17776174 |  |  |  |  |
| 4 |    |           |         | CAF98923               |  |  |  |  |
| 5 |    |           |         | chr12:3595953-6120     |  |  |  |  |
| 6 |    |           |         | chr12:3597953-8132     |  |  |  |  |
| 7 | A7 | CXCL-like | 1000004 | CAF95728               |  |  |  |  |
| 8 |    |           |         | CAG09635               |  |  |  |  |

**Table S5 C. List of polypeptide ligands with WGD-derived duplicates in *T. nigroviridis* as well as their cognate receptors. Cognate receptors with WGD-derived duplicates in *T. nigroviridis* are shown in bold letters.**

|                                                 | Receptor class | Ligand gene symbol | Ligand description                          | Cognate receptors                            | Human ligand gene ID | <i>T. nigroviridis</i> ligand gene identifier |
|-------------------------------------------------|----------------|--------------------|---------------------------------------------|----------------------------------------------|----------------------|-----------------------------------------------|
| Coevolved with a pair of WGD-derived nGPCRs     | A5             | <b>NMB</b>         | Neuromedin B                                | <b>GRPR</b> , <i>NMBR</i>                    | 4828                 | chr5:2458757-852<br>chr13:2188886-963         |
|                                                 | A5             | <b>INSL5</b>       | Insulin-like 5                              | <b>RLN3R2</b>                                | 10022                | chr1:15664564-5453<br>chr15:3444219-81        |
|                                                 | A7             | <b>RLN3</b>        | Relaxin-3                                   | <b>RLN3R1</b> , <i>LGR7</i>                  | 117579               | CAG06046<br>chr3:8563693-833                  |
|                                                 | B              | <b>ADM</b>         | Adrenomedullin                              | <b>CRLR</b>                                  | 133                  | CAF99639<br>CAG05606                          |
|                                                 | B              | <b>CALCA</b>       | Calcitonin; calcitonin gene-related peptide | <b>CRLR</b> , <i>CR</i>                      | 796                  | CAF99659<br>chr5: 6718835-9962                |
| Not coevolved with a pair of WGD-derived nGPCRs | A5             | <b>CCK</b>         | Cholecystokinin                             | <i>CCKAR</i>                                 | 885                  | CAF99479<br>CAG12884                          |
|                                                 | A7             | <b>NPB</b>         | Neuropeptide B                              | <i>GPR7</i> , <i>GPR8</i>                    | 256933               | CAG00214<br>CAG06031                          |
|                                                 | A7             | <b>CCL25</b>       | CCL25                                       | <i>CCR9</i>                                  | 6370                 | CAG07167<br>CAG07971                          |
|                                                 | B              | <b>GCG</b>         | Glucagon, GLP1, GLP2                        | <b>GCGR</b> , <i>GLP1R</i> ,<br><i>GLP2R</i> | 2641                 | CAG04974<br>CAG09338 (amino acid 740-end)     |
